# Supplementary material for: KDIGO 2018 Clinical Practice Guideline for the Prevention, Diagnosis, Evaluation, and Treatment of Hepatitis C in Chronic Kidney Disease
Source: PubMed Central journal article supplement — Kidney Int Suppl (2011). 2018 Sep 19;8(3):91–165. doi: 10.1016/j.kisu.2018.06.001 (PMC6336217; doi:10.1016/j.kisu.2018.06.001), 2018-09-19
Supplement: mmc1.pdf [file mmc1.pdf]

## APPENDIX A: ONLINE SEARCH STRATEGIES

### Kidney and HCV module

1. exp kidney glomerulus/
2. exp kidney disease/
3. exp kidney function tests/
4. exp renal replacement therapy/
5. exp kidney transplantation/
6. exp kidney, artificial/
9. renal.af. or renal.tw.
10. nephro\$.af. or nephro\$.tw.
11. kidney.af. or kidney.tw.
12. ur?emia.af. or ur?emia.tw.
13. h?emodialysis.af. or h?emodialysis.tw.
- 13a. dialysis.tw
14. (hemofiltr\$ or haemofiltr\$).af. or (hemofiltr\$ or haemofiltr\$).tw.
15. or/1-14
16. exp Hepatitis C/
17. hepatitis c.mp.
18. hep c.tw.
19. HCV.af.
20. or/16-19
21. 15 and 20
22. limit to humans

### Diagnostic tests

1. (enzyme immunoassay\$ or immune, essay\$ or EIA or NAT or nucleic acid amplification test\$ or test\$, nucleic acid or amplification technique\$, nucleic acid or tech\$, nucleic acid amplification)af.
2. limit 1 to yr-"2008-current"
3. (biops\$, liver or liver biops\$ or APRI or ((aspartate aminotransferase or ast) and platelet and (ratio or index)) or fibrotest or fibrosure or fibroscan or transient elastography or elastography, transient or elastography).af
4. 2 or 3
5. 4 not ("addresses"[pt] or "autobiography"[pt] or "bibliography"[pt] or "biography"[pt] or "case reports"[pt] or "comment"[pt] or "congresses"[pt] or "dictionary"[pt] or "directory"[pt] or "editorial"[pt] or "festschrift"[pt] or "government publications"[pt] or "historical article"[pt] or "interview"[pt] or "lectures"[pt] or "legal cases"[pt] or "legislation"[pt] or "letter"[pt] or "news"[pt] or "newspaper article"[pt] or "patient education handout"[pt] or "periodical index"[pt] or "comment on" or review[tw] OR ("Animals"[Mesh] NOT "Humans"[Mesh]) OR rats[tw] or cow[tw] or cows[tw] or chicken\*[tw] or horse[tw] or horses[tw] or mice[tw] or mouse[tw] or bovine[tw] or sheep or ovine or murine)
6. 5 and "kidney and HCV module"

### Predictor studies

1. (incidence or follow-up studies or prognosis).sh or exp models, statistical or (prognos\$ or predict\$ or course or diagnosed).tw or cohort.mp
2. 1 not ("addresses"[pt] or "autobiography"[pt] or "bibliography"[pt] or "biography"[pt] or "case reports"[pt] or "comment"[pt] or "congresses"[pt] or "dictionary"[pt] or "directory"[pt] or "editorial"[pt] or "festschrift"[pt] or "government publications"[pt] or "historical article"[pt] or "interview"[pt] or "lectures"[pt] or "legal cases"[pt] or "legislation"[pt] or "letter"[pt] or "news"[pt] or "newspaper article"[pt] or "patient education handout"[pt] or "periodical index"[pt] or "comment on" or review[tw] OR ("Animals"[Mesh] NOT "Humans"[Mesh]) OR rats[tw] or cow[tw] or cows[tw] or chicken\*[tw] or horse[tw] or horses[tw] or mice[tw] or mouse[tw] or bovine[tw] or sheep or ovine or murine)

3. 2 and “kidney and HCV module”

### **DAA or non-DAA treatment**

1. (telaprevir or boceprevir or danoprevir or RG\$7227 or faldaprevir or BI201335 or vaniprevir or MK\$7009 or sovalprevir or ACH\$1625 or simeprevir or TMC435 or asunaprevir or BMS\$650032 or paritaprevir or ABT\$450 or grazoprevir or MK\$5172 or vedoprevir or GS\$9451 or daclatasvir or BMS\$790052 or ombitasvir or ABT\$267 or ledipasvir or GS\$5885 or samatasvir or IDX\$719 or elbasvir or MK\$8742 or GS\$5816 or ACH\$3102 or sofosbuvir or GS\$7977 or mericitabine or RG\$7128 or valopicitabine or MK\$3682 or setrobuvir or ANA598 or tegobuvir or GS\$9190 or filibuvir or PF\$868554 or dasabuvir or ABT\$333 or deleobuvir or BI\$207127 or beclabuvir or BMS\$791325 or ABT\$072 or GS\$9669 or VX\$222).af

2. ribavirin.af. or (interferon or IFN).af. or (pegylated interferon or pegylated IFN).af.

3. limit 2 to yr-“2011-current”

4. 1 or 3

5. 4 and (((pre-post[tw] or "pre test"[tw] or pretest\*[tw] or posttest\*[tw] or "post test"[tw] or (pre[tw] and post[tw]))) OR ((pre-workshop[tw] or post-workshop[tw] or (before[tw] and workshop[tw]) or (after[tw] and workshop[tw]))) OR (trial[tw] or ((study[tw] and aim\*[tw]) or "our study"[tw]))) OR ((before[tw] and (after[tw] or during[tw]))) OR (("quasi-experiment" or quasiexperiment\* or "quasi random" or quasirandom\* or "quasi control" or quasicontrol\* or ((quasi or experimental) and (method or study or trial or design\*)))) OR (("time series" and interrupt\*)) OR ((time points[tw] and (over[tw] or multiple[tw] or three[tw] or four[tw] or five[tw] or six[tw] or seven[tw] or eight[tw] or nine[tw] or ten[tw] or eleven[tw] or twelve[tw] or month\*[tw] or hour\*[tw] or day[tw] or days[tw] or "more than"[tw]))) OR pilot[tw] OR "Pilot Projects"[Mesh] OR ((clinical trial[pt] or controlled clinical trial[pt] or multicenter study[pt])) OR ((multicentre[tw] or multicenter[tw] or multi-centre[tw] or multi-center[tw])) OR (random\*[tw] or controlled[tw])) OR ((control[tw] and (area[tw] or cohort\*[tw] or compare\*[tw] or condition[tw] or design[tw] or group[tw] or groups[tw] or grouping[tw] or intervention\*[tw] or participant\*[tw] or study[tw])) NOT (((("comment on" or review[tw] or review [pt])) OR (("Animals"[Mesh] NOT "Humans"[Mesh]))) OR ((rat[tw] or rats[tw] or cow[tw] or cows[tw] or chicken\*[tw] or horse[tw] or horses[tw] or mice[tw] or mouse[tw] or bovine[tw] or animal\*[tw]))) OR ("Epidemiologic Studies"[Mesh] OR "Case-Control Studies"[Mesh] OR "Cohort Studies"[Mesh] or "Cross-Sectional Studies"[Mesh] OR "Case control" OR cohort OR (Follow up AND (study or studies)) OR (observational and (study or studies)) OR Longitudinal OR Retrospective OR cross section\* OR cross-section\* OR "Prospective Studies"[Mesh] OR "Longitudinal Studies"[Mesh] "Follow-Up Studies"[Mesh] OR (follow-up or followup)) or (systematic[sb] OR meta-analysis[pt] OR meta-analysis as topic[mh] OR meta-analysis[mh] OR meta analy\* OR metanaly\* OR metaanaly\* OR met analy\* OR (systematic AND (review\* OR overview\*)) OR "Review Literature as Topic"[Mesh] OR cochrane[tiab] OR embase[tiab] OR (psychlit[tiab] or psyclit[tiab]) OR (psychinfo[tiab] or psycinfo[tiab])OR (cinahl[tiab] or cinhal[tiab]) OR science citation index[tiab] OR bids[tiab] OR cancerlit[tiab] OR reference list\*[tiab] OR bibliograph\*[tiab] OR hand-search\*[tiab] OR relevant journals[tiab] OR manual search\*[tiab] OR selection criteria[tiab] OR data extraction[tiab]) or ((pharmacokinetic or pharmacodynamic).tw or exp Clinical Trial, Phase II/ or exp Clinical Trial, Phase III/)

6. 5 and “kidney and HCV module”

### **Isolation**

1. (isolat\$ or transmi\$ or quarantine or sequestra\$ or segregat\$ or separat\$).af

2. 1 not (addresses or bibliography or biography or comment or dictionary or directory or editorial or festschrift or legal cases or legislation or letter or news or newspaper article or patient education handout or periodical index or "review" or review, academic or review, tutorial)

3. 2 and “kidney and HCV module”

## Transplant topics

1. exp kidney transplantation/
2. (kidney or renal).af
3. exp transplantation/
4. exp allograft/
5. 1 or (2 and (3 or 4))
6. exp Hepatitis C/
7. hepatitis c.mp.
8. hep c.tw.
9. HCV.af.
10. or/6-9
11. 5 and 10
12. limit 11 to humans
13. limit 12 to (addresses or bibliography or biography or comment or dictionary or directory or editorial or festschrift or legal cases or legislation or letter or news or newspaper article or patient education handout or periodical index or "review" or review, academic or review, tutorial)
14. 12 not 13

## Glomerulonephritis

1. glomerulonephritis.mp. or exp Glomerulonephritis/
2. glomerulopathy.tw.
3. immunotactoid glomerulopathy.tw
4. exp Nephrotic Syndrome/
5. exp Glomerulonephritis, Membranous/
6. glomerulonephrit\$.tw.
7. exp Glomerulonephritis, Membranoproliferative/
8. membranous nephropathy.tw.
9. (IGA nephropathy or immunoglobulin A nephropathy).mp. or IGAN.tw.
10. exp Glomerulonephritis, IgA/
11. rapidly progressive glomerulonephr\$.tw.
12. RPGN.tw.
13. (focal sclerosing glomerulopathy or FSGS).tw.
14. Sclerosing Glomerulonephrit\$.tw. or sclerosing glomerulonephritis/
15. glomerulosclerosis.tw.
16. Mesangiocapillary Glomerulonephrit\$.tw.
17. (Hypocomplementemia and Glomerulonephritis).tw.
18. Berger's disease.mp. or Bergers.tw.
19. Focal segmental glomerulosclerosis.mp. or focal segmental glomerulo\$.tw.
20. Goodpasture syndrome.mp. or Goodpasture.tw.
21. Nephritis.mp. or Nephritis.tw.
22. exp Purpura, Schoenlein-Henoch/
23. (exp Antibodies, Antineutrophil Cytoplasmic/ and vasculitis/et) or (ANCA adj1 vasculitis).tw.
24. exp Glomerulosclerosis, Focal Segmental/
25. exp Nephrosis, Lipoid/
26. Minimal change nephropathy.mp.
27. minimal change disease.mp.
28. churg-strauss syndrome/ or wegenger granulomatosis/
29. exp Lupus Nephritis/ or Lupus nephritis.mp.
30. renal vasculitis.tw.
31. fibrillary glomerulonephritis.tw
32. amyloidosis.tw
33. or/1-32

34. exp Hepatitis C/
35. hepatitis c.mp.
36. hep c.tw.
37. HCV.af.
38. or/34-37
39. 33 and 38
40. limit 39 to yr="2008-current"
41. limit 40 to humans
42. limit 41 to (addresses or bibliography or biography or comment or dictionary or directory or editorial or festschrift or legal cases or legislation or letter or news or newspaper article or patient education handout or periodical index or "review" or review, academic or review, tutorial)
43. 41 not 42
