# Supplementary material for: KDIGO 2018 Clinical Practice Guideline for the Prevention, Diagnosis, Evaluation, and Treatment of Hepatitis C in Chronic Kidney Disease
Source: PubMed Central journal article supplement — Kidney Int Suppl (2011). 2018 Sep 19;8(3):91–165. doi: 10.1016/j.kisu.2018.06.001 (PMC6336217; doi:10.1016/j.kisu.2018.06.001), 2018-09-19
Supplement: mmc2.pdf [file mmc2.pdf]

## APPENDIX B: CONCURRENCE WITH INSTITUTE OF MEDICINE STANDARDS FOR SYSTEMATIC REVIEWS AND FOR GUIDELINES

| IOM Standards for Systematic Reviews                                                                                                                                                                                        | Part of<br>KDIGO<br>Process?           |
|-----------------------------------------------------------------------------------------------------------------------------------------------------------------------------------------------------------------------------|----------------------------------------|
| 2.1 Establish a team with appropriate expertise and experience to conduct the systematic review                                                                                                                             | Yes                                    |
| 2.1.1 Include expertise in the pertinent clinical content areas                                                                                                                                                             | Yes                                    |
| 2.1.2 Include expertise in systematic review methods                                                                                                                                                                        | Yes                                    |
| 2.1.3 Include expertise in searching for relevant evidence                                                                                                                                                                  | Yes                                    |
| 2.1.4 Include expertise in quantitative methods                                                                                                                                                                             | Yes                                    |
| 2.1.5 Include other expertise as appropriate                                                                                                                                                                                | Yes                                    |
| 2.2 Manage bias and conflict of interest (COI) of the team conducting the systematic review                                                                                                                                 | Yes                                    |
| 2.2.1 Require each team member to disclose potential COI and professional or intellectual bias                                                                                                                              | Yes (not explicitly intellectual bias) |
| 2.2.2 Exclude individuals with a clear financial conflict                                                                                                                                                                   | Yes                                    |
| 2.2.3 Exclude individuals whose professional or intellectual bias would diminish the credibility of the review in the eyes of the intended users                                                                            | Not explicitly                         |
| 2.3 Ensure user and stakeholder input as the review is designed and conducted                                                                                                                                               | Yes                                    |
| 2.3.1 Protect the independence of the review team to make the final decisions about the design, analysis, and reporting of the review                                                                                       | Yes                                    |
| 2.4 Manage bias and COI for individuals providing input into the systematic review                                                                                                                                          | Yes                                    |
| 2.4.1 Require individuals to disclose potential COI and professional or intellectual bias                                                                                                                                   | Yes (not intellectual bias)            |
| 2.4.2 Exclude input from individuals whose COI or bias would diminish the credibility of the review in the eyes of the intended users                                                                                       | No                                     |
| 2.5 Formulate the topic for the systematic review                                                                                                                                                                           | Yes                                    |
| 2.5.1 Confirm the need for a new review                                                                                                                                                                                     | Yes                                    |
| 2.5.2 Develop an analytic framework that clearly lays out the chain of logic that links the health intervention to the outcomes of interest and defines the key clinical questions to be addressed by the systematic review | No                                     |
| 2.5.3 Use a standard format to articulate each clinical question of interest                                                                                                                                                | No                                     |
| 2.5.4 State the rationale for each clinical question                                                                                                                                                                        | No                                     |
| 2.5.5 Refine each question based on user and stakeholder input                                                                                                                                                              | Yes                                    |
| 2.6 Develop a systematic review protocol                                                                                                                                                                                    | Yes                                    |
| 2.6.1 Describe the context and rationale for the review from both a decision-making and research perspective                                                                                                                | No                                     |
| 2.6.2 Describe the study screening and selection criteria (inclusion/exclusion criteria)                                                                                                                                    | Yes                                    |
| 2.6.3 Describe precisely which outcome measures, time points, interventions, and comparison groups will be addressed                                                                                                        | Yes                                    |
| 2.6.4 Describe the search strategy for identifying relevant evidence                                                                                                                                                        | Yes                                    |
| 2.6.5 Describe the procedures for study selection                                                                                                                                                                           | Yes                                    |
| 2.6.6 Describe the data extraction strategy                                                                                                                                                                                 | Yes                                    |
| 2.6.7 Describe the process for identifying and resolving disagreement between researchers in study selection and data extraction decisions                                                                                  | Yes                                    |
| 2.6.8 Describe the approach to critically appraising individual studies                                                                                                                                                     | Yes                                    |
| 2.6.9 Describe the method for evaluating the body of evidence, including the quantitative and qualitative synthesis strategies                                                                                              | Yes                                    |

| IOM Standards for Systematic Reviews |                                                                                                                                                                                                                                                                                                                                                                                                                | Part of KDIGO Process?                             |
|--------------------------------------|----------------------------------------------------------------------------------------------------------------------------------------------------------------------------------------------------------------------------------------------------------------------------------------------------------------------------------------------------------------------------------------------------------------|----------------------------------------------------|
| 2.6.10                               | Describe and justify any planned analyses of differential treatment effects according to patient subgroups, how an intervention is delivered, or how an outcome is measured                                                                                                                                                                                                                                    | Yes                                                |
| 2.6.11                               | Describe the proposed timetable for conducting the review                                                                                                                                                                                                                                                                                                                                                      | Yes                                                |
| 2.7                                  | Submit the protocol for peer review                                                                                                                                                                                                                                                                                                                                                                            | No                                                 |
| 2.7.1                                | Provide a public comment period for the protocol and publicly report on disposition of comments                                                                                                                                                                                                                                                                                                                | No                                                 |
| 2.8                                  | Make the final protocol publicly available, and add any amendments to the protocol in a timely fashion                                                                                                                                                                                                                                                                                                         | No                                                 |
| 3.1                                  | Conduct a comprehensive systematic search for evidence                                                                                                                                                                                                                                                                                                                                                         | Yes                                                |
| 3.1.1                                | Work with a librarian or other information specialist trained in performing systematic reviews to plan the search strategy                                                                                                                                                                                                                                                                                     | Yes                                                |
| 3.1.2                                | Design the search strategy to address each key research question                                                                                                                                                                                                                                                                                                                                               | Yes                                                |
| 3.1.3                                | Use an independent librarian or other information specialist to peer review the search strategy                                                                                                                                                                                                                                                                                                                | No                                                 |
| 3.1.4                                | Search bibliographic databases                                                                                                                                                                                                                                                                                                                                                                                 | Yes                                                |
| 3.1.5                                | Search citation indexes                                                                                                                                                                                                                                                                                                                                                                                        | No                                                 |
| 3.1.6                                | Search literature cited by eligible studies                                                                                                                                                                                                                                                                                                                                                                    | No                                                 |
| 3.1.7                                | Update the search at intervals appropriate to the pace of generation of new information for the research question being addressed                                                                                                                                                                                                                                                                              | Yes                                                |
| 3.1.8                                | Search subject-specific databases if other databases are unlikely to provide all relevant evidence                                                                                                                                                                                                                                                                                                             | N/A                                                |
| 3.1.9                                | Search regional bibliographic databases if other databases are unlikely to provide all relevant evidence                                                                                                                                                                                                                                                                                                       | N/A                                                |
| 3.2                                  | Take action to address potentially biased reporting of research results                                                                                                                                                                                                                                                                                                                                        | No                                                 |
| 3.2.1                                | Search grey-literature databases, clinical trial registries, and other sources of unpublished information about studies                                                                                                                                                                                                                                                                                        | Yes                                                |
| 3.2.2                                | Invite researchers to clarify information about study eligibility, study characteristics, and risk of bias                                                                                                                                                                                                                                                                                                     | No                                                 |
| 3.2.3                                | Invite all study sponsors and researchers to submit unpublished data, including unreported outcomes, for possible inclusion in the systematic review                                                                                                                                                                                                                                                           | No                                                 |
| 3.2.4                                | Handsearch selected journals and conference abstracts                                                                                                                                                                                                                                                                                                                                                          | Yes                                                |
| 3.2.5                                | Conduct a web search                                                                                                                                                                                                                                                                                                                                                                                           | No                                                 |
| 3.2.6                                | Search for studies reported in languages other than English if appropriate                                                                                                                                                                                                                                                                                                                                     | Yes                                                |
| 3.3                                  | Screen and select studies                                                                                                                                                                                                                                                                                                                                                                                      | Yes                                                |
| 3.3.1                                | Include or exclude studies based on the protocol's prespecified criteria                                                                                                                                                                                                                                                                                                                                       | Yes                                                |
| 3.3.2                                | Use observational studies in addition to randomized clinical trials to evaluate harms of interventions                                                                                                                                                                                                                                                                                                         | Yes                                                |
| 3.3.3                                | Use two or more members of the review team, working independently, to screen and select studies                                                                                                                                                                                                                                                                                                                | Yes                                                |
| 3.3.4                                | Train screeners using written documentation; test and retest screeners to improve accuracy and consistency                                                                                                                                                                                                                                                                                                     | Yes                                                |
| 3.3.5                                | Use one of two strategies to select studies: (1) read all fulltext articles identified in the search or (2) screen titles and abstracts of all articles and then read the full texts of articles identified in initial screening                                                                                                                                                                               | Yes (2)                                            |
| 3.3.6                                | Taking account of the risk of bias, consider using observational studies to address gaps in the evidence from randomized clinical trials on the benefits of interventions                                                                                                                                                                                                                                      | Yes                                                |
| 3.4                                  | Document the search                                                                                                                                                                                                                                                                                                                                                                                            | Yes                                                |
| 3.4.1                                | Provide a line-by-line description of the search strategy, including the date of every search for each database, web browser, etc.                                                                                                                                                                                                                                                                             | Yes                                                |
| 3.4.2                                | Document the disposition of each report identified including reasons for their exclusion if appropriate                                                                                                                                                                                                                                                                                                        | No                                                 |
| 3.5                                  | Manage data collection                                                                                                                                                                                                                                                                                                                                                                                         | Yes                                                |
| 3.5.1                                | At a minimum, use two or more researchers, working independently, to extract quantitative and other critical data from each study. For other types of data, one individual could extract the data while the second individual independently checks for accuracy and completeness. Establish a fair procedure for resolving discrepancies—do not simply give final decision-making power to the senior reviewer | One reviewer extracted data and the second checked |

| IOM Standards for Systematic Reviews                                                                                                                                                                                                                                                                                                                                                                                         | Part of KDIGO Process? |
|------------------------------------------------------------------------------------------------------------------------------------------------------------------------------------------------------------------------------------------------------------------------------------------------------------------------------------------------------------------------------------------------------------------------------|------------------------|
| 3.5.2 Link publications from the same study to avoid including data from the same study more than once                                                                                                                                                                                                                                                                                                                       | Yes                    |
| 3.5.3 Use standard data extraction forms developed for the specific SR                                                                                                                                                                                                                                                                                                                                                       | Yes                    |
| 3.5.4 Pilot-test the data extraction forms and process                                                                                                                                                                                                                                                                                                                                                                       | Yes                    |
| 3.6 Critically appraise each study                                                                                                                                                                                                                                                                                                                                                                                           | Yes                    |
| 3.6.1 Systematically assess the risk of bias, using predefined criteria                                                                                                                                                                                                                                                                                                                                                      | Yes                    |
| 3.6.2 Assess the relevance of the study's populations, interventions, and outcome measures                                                                                                                                                                                                                                                                                                                                   | Yes                    |
| 3.6.3 Assess the fidelity of the implementation of interventions                                                                                                                                                                                                                                                                                                                                                             | Yes                    |
| 4.1 Use a prespecified method to evaluate the body of evidence                                                                                                                                                                                                                                                                                                                                                               | Yes                    |
| 4.1.1 For each outcome, systematically assess the following characteristics of the body of evidence: Risk of bias; Consistency; Precision; Directness; Reporting bias                                                                                                                                                                                                                                                        | Yes                    |
| 4.1.2 For bodies of evidence that include observational research, also systematically assess the following characteristics for each outcome: Dose–response association; Plausible confounding that would change the observed effect; Strength of association                                                                                                                                                                 | Yes                    |
| 4.1.3 For each outcome specified in the protocol, use consistent language to characterize the level of confidence in the estimates of the effect of an intervention                                                                                                                                                                                                                                                          | Yes                    |
| 4.2 Conduct a qualitative synthesis                                                                                                                                                                                                                                                                                                                                                                                          | Yes                    |
| 4.2.1 Describe the clinical and methodological characteristics of the included studies, including their size, inclusion or exclusion of important subgroups, timeliness, and other relevant factors                                                                                                                                                                                                                          | Yes                    |
| 4.2.2 Describe the strengths and limitations of individual studies and patterns across studies                                                                                                                                                                                                                                                                                                                               | Yes                    |
| 4.2.3 Describe, in plain terms, how flaws in the design or execution of the study (or groups of studies) could bias the results, explaining the reasoning behind these judgments                                                                                                                                                                                                                                             | No                     |
| 4.2.4 Describe the relationships between the characteristics of the individual studies and their reported findings and patterns across studies                                                                                                                                                                                                                                                                               | No                     |
| 4.2.5 Discuss the relevance of individual studies to the populations, comparisons, cointerventions, settings, and outcomes or measures of interest                                                                                                                                                                                                                                                                           | No                     |
| 4.3 Decide if, in addition to a qualitative analysis, the systematic review will include a quantitative analysis (meta-analysis)                                                                                                                                                                                                                                                                                             | Yes                    |
| 4.3.1 Explain why a pooled estimate might be useful to decision makers                                                                                                                                                                                                                                                                                                                                                       | No                     |
| 4.4 If conducting a meta-analysis, then do the following: <ul style="list-style-type: none"> <li>• Use expert methodologists to develop, execute, and peer review the meta-analyses</li> <li>• Address the heterogeneity among study effects</li> <li>• Accompany all estimates with measures of statistical uncertainty</li> <li>• Assess the sensitivity of conclusions to changes in the protocol, assumptions</li> </ul> | N/A                    |
| 5.1 Prepare final report using a structured format                                                                                                                                                                                                                                                                                                                                                                           | N/A                    |
| 5.1.1 Include a report title                                                                                                                                                                                                                                                                                                                                                                                                 | N/A                    |
| 5.1.2 Include an abstract                                                                                                                                                                                                                                                                                                                                                                                                    | N/A                    |
| 5.1.3 Include an executive summary                                                                                                                                                                                                                                                                                                                                                                                           | N/A                    |
| 5.1.4 Include a summary written for the lay public                                                                                                                                                                                                                                                                                                                                                                           | N/A                    |
| 5.1.5 Include an introduction (rationale and objectives)                                                                                                                                                                                                                                                                                                                                                                     | N/A                    |
| 5.1.6 Include a methods section. Describe the following:                                                                                                                                                                                                                                                                                                                                                                     | Yes                    |
| • Research protocol                                                                                                                                                                                                                                                                                                                                                                                                          | Yes                    |
| • Eligibility criteria (criteria for including and excluding studies in the systematic review)                                                                                                                                                                                                                                                                                                                               | Yes                    |
| • Analytic framework and key questions                                                                                                                                                                                                                                                                                                                                                                                       | No                     |
| • Databases and other information sources used to identify relevant studies                                                                                                                                                                                                                                                                                                                                                  | Yes                    |
| • Search strategy                                                                                                                                                                                                                                                                                                                                                                                                            | Yes                    |
| • Study selection process                                                                                                                                                                                                                                                                                                                                                                                                    | Yes                    |
| • Data extraction process                                                                                                                                                                                                                                                                                                                                                                                                    | Yes                    |
| • Methods for handling missing information                                                                                                                                                                                                                                                                                                                                                                                   | No                     |

| IOM Standards for Systematic Reviews |                                                                                                                                              | Part of KDIGO Process?    |
|--------------------------------------|----------------------------------------------------------------------------------------------------------------------------------------------|---------------------------|
|                                      | • Information to be extracted from included studies                                                                                          | Yes                       |
|                                      | • Methods to appraise the quality of individual studies                                                                                      | Yes                       |
|                                      | • Summary measures of effect size (e.g., risk ratio, difference in means)                                                                    | No                        |
|                                      | • Rationale for pooling (or not pooling) results of included studies                                                                         | No                        |
|                                      | • Methods of synthesizing the evidence (qualitative and meta-analysis)                                                                       | Yes                       |
|                                      | • Additional analyses, if done, indicating which were prespecified                                                                           | N/A                       |
| 5.1.7                                | Include a results section; organize the presentation of results around key questions; describe the following (repeat for each key question): | N/A                       |
| 5.1.8                                | Include a discussion section. Include the following:                                                                                         | N/A <sup>1</sup>          |
|                                      | • Summary of the evidence                                                                                                                    | Mostly                    |
|                                      | • Strengths and limitations of the systematic review                                                                                         | Yes (in Methods Appendix) |
|                                      | • Conclusions for each key question                                                                                                          | No                        |
|                                      | • Gaps in evidence                                                                                                                           | Yes                       |
| 5.1.9                                | Include a section describing funding sources and COI                                                                                         | Yes                       |
| 5.2                                  | Peer review the draft report                                                                                                                 | N/A                       |
| 5.2.1                                | Use a third party to manage the peer review process                                                                                          | N/A                       |
| 5.2.2                                | Provide a public comment period for the report and publicly report on disposition of comments                                                | N/A <sup>2</sup>          |
| 5.3                                  | Publish the final report in a manner that ensures free public access                                                                         | N/A <sup>3</sup>          |

<sup>1</sup> The systematic review is not written up as a separate report. There is no stand-alone discussion section. The evidence is summarized in individual rationale sections of the guideline as needed to support the recommendations. There are no key questions, per se, for which to write conclusions, beyond what is summarized as needed in the rationale for the recommendations. Gaps in the evidence are discussed as needed to support the recommendations.

<sup>2</sup> There is a public comment period for the guideline as a whole, not for the systematic review, per se.

<sup>3</sup> The guideline is published in a manner that ensures free public access; however, there is no stand-alone systematic review published.

| IOM Standards for Developing Trustworthy Clinical Practice Guidelines           |                                                                                                                                                                                                                                                                                                                                 | Part of KDIGO Process?  |
|---------------------------------------------------------------------------------|---------------------------------------------------------------------------------------------------------------------------------------------------------------------------------------------------------------------------------------------------------------------------------------------------------------------------------|-------------------------|
| 1. Establishing Transparency                                                    |                                                                                                                                                                                                                                                                                                                                 |                         |
| 1.1                                                                             | The processes by which a CPG is developed and funded should be detailed explicitly and publicly accessible.                                                                                                                                                                                                                     | Yes                     |
| 2. Management of Conflict of Interest (COI)                                     |                                                                                                                                                                                                                                                                                                                                 | Yes                     |
| 2.1                                                                             | Prior to selection of the guideline development group (GDG), individuals being considered for membership should declare all interests and activities potentially resulting in COI with development group activity, by written disclosure to those convening the GDG:                                                            | Yes                     |
|                                                                                 | <ul style="list-style-type: none"> <li>Disclosure should reflect all current and planned commercial (including services from which a clinician derives a substantial proportion of income), non-commercial, intellectual, institutional, and patient- public activities pertinent to the potential scope of the CPG.</li> </ul> | Yes (not intellectual)  |
| 2.2 Disclosure of COIs within GDG:                                              |                                                                                                                                                                                                                                                                                                                                 |                         |
|                                                                                 | <ul style="list-style-type: none"> <li>All COI of each GDG member should be reported and discussed by the prospective development group prior to the onset of his or her work.</li> </ul>                                                                                                                                       | Reported, not discussed |
|                                                                                 | <ul style="list-style-type: none"> <li>Each panel member should explain how his or her COI could influence the CPG development process or specific recommendations.</li> </ul>                                                                                                                                                  | No                      |
| 2.3 Divestment                                                                  |                                                                                                                                                                                                                                                                                                                                 |                         |
|                                                                                 | <ul style="list-style-type: none"> <li>Members of the GDG should divest themselves of financial investments they or their family members have in, and not participate in marketing activities or advisory boards of, entities whose interests could be affected by CPG recommendations.</li> </ul>                              | Not explicitly          |
| 2.4 Exclusions                                                                  |                                                                                                                                                                                                                                                                                                                                 |                         |
|                                                                                 | <ul style="list-style-type: none"> <li>Whenever possible GDG members should not have COI.</li> </ul>                                                                                                                                                                                                                            | No                      |
|                                                                                 | <ul style="list-style-type: none"> <li>In some circumstances, a GDG may not be able to perform its work without members who have COIs, such as relevant clinical specialists who receive a substantial portion of their incomes from services pertinent to the CPG.</li> </ul>                                                  | True for KDIGO          |
|                                                                                 | <ul style="list-style-type: none"> <li>Members with COIs should represent not more than a minority of the GDG.</li> </ul>                                                                                                                                                                                                       | No                      |
|                                                                                 | <ul style="list-style-type: none"> <li>The chair or cochair should not be a person(s) with COI.</li> </ul>                                                                                                                                                                                                                      | No                      |
|                                                                                 | <ul style="list-style-type: none"> <li>Funders should have no role in CPG development.</li> </ul>                                                                                                                                                                                                                               | Yes                     |
| 3. Guideline Development Group Composition                                      |                                                                                                                                                                                                                                                                                                                                 |                         |
| 3.1                                                                             | The GDG should be multidisciplinary and balanced, comprising a variety of methodological experts and clinicians, and populations expected to be affected by the CPG.                                                                                                                                                            | Yes                     |
| 3.2                                                                             | Patient and public involvement should be facilitated by including (at least at the time of clinical question formulation and draft CPG review) a current or former patient, and a patient advocate or patient/consumer organization representative in the GDG.                                                                  | No                      |
| 3.3                                                                             | Strategies to increase effective participation of patient and consumer representatives, including training in appraisal of evidence, should be adopted by GDGs.                                                                                                                                                                 | No                      |
| 4. Clinical Practice Guideline–Systematic Review Intersection                   |                                                                                                                                                                                                                                                                                                                                 |                         |
| 4.1                                                                             | Clinical practice guideline developers should use systematic reviews that meet standards set by the Institute of Medicine's Committee on Standards for Systematic Reviews of Comparative Effectiveness Research.                                                                                                                | Yes                     |
| 4.2                                                                             | When systematic reviews are conducted specifically to inform particular guidelines, the GDG and systematic review team should interact regarding the scope, approach, and output of both processes.                                                                                                                             | Yes                     |
| 5. Establishing Evidence Foundations for and Rating Strength of Recommendations |                                                                                                                                                                                                                                                                                                                                 |                         |
| 5.1                                                                             | For each recommendation, the following should be provided:                                                                                                                                                                                                                                                                      |                         |
|                                                                                 | <ul style="list-style-type: none"> <li>An explanation of the reasoning underlying the recommendation, including <ul style="list-style-type: none"> <li>a clear description of potential benefits and harms;</li> </ul> </li> </ul>                                                                                              | Yes                     |
|                                                                                 |                                                                                                                                                                                                                                                                                                                                 | Yes                     |

| IOM Standards for Developing Trustworthy Clinical Practice Guidelines                                                                                                                                                                                                                                                                                                                                                                                         | Part of KDIGO Process?                                                                                                                                           |
|---------------------------------------------------------------------------------------------------------------------------------------------------------------------------------------------------------------------------------------------------------------------------------------------------------------------------------------------------------------------------------------------------------------------------------------------------------------|------------------------------------------------------------------------------------------------------------------------------------------------------------------|
| <ul style="list-style-type: none"> <li>a summary of relevant available evidence (and evidentiary gaps), description of the quality (including applicability), quantity (including completeness), and consistency of the aggregate available evidence;</li> </ul>                                                                                                                                                                                              | Yes                                                                                                                                                              |
| <ul style="list-style-type: none"> <li>an explanation of the part played by values, opinion, theory, and clinical experience in deriving the recommendation.</li> </ul>                                                                                                                                                                                                                                                                                       | Yes                                                                                                                                                              |
| <ul style="list-style-type: none"> <li>A rating of the level of confidence in (certainty regarding) the evidence underpinning the recommendation</li> </ul>                                                                                                                                                                                                                                                                                                   | Yes                                                                                                                                                              |
| <ul style="list-style-type: none"> <li>A rating of the strength of the recommendation in light of the preceding bullets</li> </ul>                                                                                                                                                                                                                                                                                                                            | Yes                                                                                                                                                              |
| <ul style="list-style-type: none"> <li>A description and explanation of any differences of opinion regarding the recommendation</li> </ul>                                                                                                                                                                                                                                                                                                                    | Yes                                                                                                                                                              |
| 6. Articulation of Recommendations                                                                                                                                                                                                                                                                                                                                                                                                                            |                                                                                                                                                                  |
| 6.1 Recommendations should be articulated in a standardized form detailing precisely what the recommended action is, and under what circumstances it should be performed.                                                                                                                                                                                                                                                                                     | Yes                                                                                                                                                              |
| 6.2 Strong recommendations should be worded so that compliance with the recommendation(s) can be evaluated.                                                                                                                                                                                                                                                                                                                                                   | Yes                                                                                                                                                              |
| 7. External Review                                                                                                                                                                                                                                                                                                                                                                                                                                            |                                                                                                                                                                  |
| 7.1 External reviewers should comprise a full spectrum of relevant stakeholders, including scientific and clinical experts, organizations (e.g., health care, specialty societies), agencies (e.g., federal government), patients, and representatives of the public.                                                                                                                                                                                         | Yes                                                                                                                                                              |
| 7.2 The authorship of external reviews submitted by individuals and/or organizations should be kept confidential unless that protection has been waived by the reviewer(s).                                                                                                                                                                                                                                                                                   | Yes                                                                                                                                                              |
| 7.3 The GDG should consider all external reviewer comments...<br>...and keep a written record of the rationale for modifying or not modifying a CPG in response to reviewers' comments.                                                                                                                                                                                                                                                                       | Yes<br>Yes                                                                                                                                                       |
| 7.4 A draft of the CPG at the external review stage or immediately following it (i.e., prior to the final draft) should be made available to the general public for comment. Reasonable notice of impending publication should be provided to interested public stakeholders.                                                                                                                                                                                 | Yes                                                                                                                                                              |
| 8. Updating                                                                                                                                                                                                                                                                                                                                                                                                                                                   |                                                                                                                                                                  |
| 8.1 The CPG publication date, date of pertinent systematic evidence review, and proposed date for future CPG review should be documented in the CPG.                                                                                                                                                                                                                                                                                                          | Yes; The requirement for an update will be assessed periodically from the publication date or earlier if important new evidence becomes available in the interim |
| 8.2 Literature should be monitored regularly following CPG publication to identify the emergence of new, potentially relevant evidence and to evaluate the continued validity of the CPG.                                                                                                                                                                                                                                                                     | Planned after publication                                                                                                                                        |
| 8.3 CPGs should be updated when new evidence suggests the need for modification of clinically important recommendations. For example, a CPG should be updated if new evidence shows that a recommended intervention causes previously unknown substantial harm; that a new intervention is significantly superior to a previously recommended intervention from an efficacy or harms perspective; or that a recommendation can be applied to new populations. | Planned after publication                                                                                                                                        |
