# Supplementary material for: KDIGO 2018 Clinical Practice Guideline for the Prevention, Diagnosis, Evaluation, and Treatment of Hepatitis C in Chronic Kidney Disease
Source: PubMed Central journal article supplement — Kidney Int Suppl (2011). 2018 Sep 19;8(3):91–165. doi: 10.1016/j.kisu.2018.06.001 (PMC6336217; doi:10.1016/j.kisu.2018.06.001), 2018-09-19
Supplement: mmc3.pdf [file mmc3.pdf]

**Table S1: Summary Table**  
**Diagnostic testing for liver fibrosis (by biopsy)**  
**Categorical outcomes**

| PMID     | Author                                                                                                                      | Year | Type of article           | Study design              | Population | Sample size | Description of Diagnostic Test |                                            | Timpoint             |              |
|----------|-----------------------------------------------------------------------------------------------------------------------------|------|---------------------------|---------------------------|------------|-------------|--------------------------------|--------------------------------------------|----------------------|--------------|
|          |                                                                                                                             |      |                           |                           |            |             | Diagnostic test                | Reference standard (Sensitivity threshold) |                      |              |
| 20357753 | Liu CH., Liang CC., Liu CJ., Hsu SJ., Lin JW., Chen SI., Hung PH., Tsai HB., Lai MY., Chen PJ., Chen JH., Chen DS., Kao JH. | 2010 | Peer-reviewed publication | Cohort study, prospective | HD         | 279         | APRI (≥0.30)                   | Liver biopsy (F2-F4)                       | 0 months             |              |
|          |                                                                                                                             |      |                           |                           |            |             |                                |                                            | 12-18 months         |              |
|          |                                                                                                                             |      |                           |                           |            | HD          | 279                            | APRI (≥0.40)                               | Liver biopsy (F2-F4) | 0 months     |
|          |                                                                                                                             |      |                           |                           |            |             |                                |                                            |                      | 12-18 months |
|          |                                                                                                                             |      |                           |                           |            | HD          | 279                            | APRI (≥0.60)                               | Liver biopsy (F2-F4) | 0 months     |
|          |                                                                                                                             |      |                           |                           |            |             |                                |                                            |                      | 12-18 months |
|          |                                                                                                                             |      |                           |                           |            | HD          | 279                            | APRI (≥0.80)                               | Liver biopsy (F2-F4) | 0 months     |
|          |                                                                                                                             |      |                           |                           |            |             |                                |                                            |                      | 12-18 months |
|          |                                                                                                                             |      |                           |                           |            | HD          | 279                            | APRI (≥0.95)                               | Liver biopsy (F2-F4) | 0 months     |
|          |                                                                                                                             |      |                           |                           |            |             |                                |                                            |                      | 12-18 months |
| 17634962 | Schiavon LL., Schiavon JL., Filho RJ., Sampaio JP., Lanzoni VP., Silva AE., Ferraz ML.                                      | 2007 | Peer-reviewed publication | Cross-sectional study     | HD         | 203         | APRI (≥0.4)                    | Liver biopsy (F2-F4)                       | nd                   |              |
|          |                                                                                                                             |      |                           |                           |            |             | APRI (≥0.95)                   | Liver biopsy (F2-F4)                       |                      |              |

| PMID             | Author                                                                                                                        | Year | Type of article           | Study design          | Population                  | Sample size | Description of Diagnostic Test |                                               |          |
|------------------|-------------------------------------------------------------------------------------------------------------------------------|------|---------------------------|-----------------------|-----------------------------|-------------|--------------------------------|-----------------------------------------------|----------|
|                  |                                                                                                                               |      |                           |                       |                             |             | Diagnostic test                | Reference standard<br>(Sensitivity threshold) | Timpoint |
|                  |                                                                                                                               |      |                           |                       |                             |             | APRI<br>(>0.55)                | Liver biopsy<br>(F3-F4)                       |          |
|                  |                                                                                                                               |      |                           |                       |                             |             | APRI<br>(≥1.00)                | Liver biopsy<br>(F3-F4)                       |          |
| 19758273         | Schiavon LL., Carvalho-Filho RJ., Narciso-Schiavon JL., Pinheiro SR., Barbosa DV., Lanzoni VP., Ferraz ML., Silva AE.         | 2010 | Peer-reviewed publication | Cross-sectional study | Transplant                  | 102         | APRI<br>(>0.50)                | Liver biopsy<br>(F2-F4)                       | nd       |
|                  |                                                                                                                               |      |                           |                       |                             |             | APRI<br>(>1.50)                | Liver biopsy<br>(F2-F4)                       |          |
| ATC-abstract 596 | A. Brar, M. Salifu, M. Rampal, N. Sumrani, D. John, F. Tedla.                                                                 | 2012 | Abstract                  | Cross-sectional study | HD                          | 26          | APRI                           | Liver biopsy<br>(F2-F4)                       | nd       |
| 24353319         | Jiang Y., Huang E., Mehrnia A., Kamgar M., Pham PT., Ogunorunyinka O., Brown I., Danovitch GM., Bunnapradist S.               | 2014 | Peer-reviewed publication | Cross-sectional study | HD? (Transplant candidates) | 210         | APRI<br>(≥0.4)                 | Liver biopsy<br>(F3-F4)                       | nd       |
|                  |                                                                                                                               |      |                           |                       |                             |             | APRI<br>(>0.95)                | Liver biopsy<br>(F3-F4)                       |          |
| 21393486         | Liu CH., Liang CC., Huang KW., Liu CJ., Chen SI., Lin JW., Hung PH., Tsai HB., Lai MY., Chen PJ., Chen JH., Chen DS., Kao JH. | 2011 | Peer-reviewed publication | Cross-sectional study | HD                          | 304         | APRI<br>(1.5)                  | Liver biopsy<br>(≥F2)                         | nd       |
|                  |                                                                                                                               |      |                           |                       |                             |             | APRI<br>(0.55)                 | Liver biopsy<br>(≥F2)                         | nd       |
|                  |                                                                                                                               |      |                           |                       |                             |             | APRI<br>(0.5)                  | Liver biopsy<br>(≥F2)                         | nd       |
|                  |                                                                                                                               |      |                           |                       |                             |             | APRI<br>(1.75)                 | Liver biopsy<br>(F3)                          | nd       |
|                  |                                                                                                                               |      |                           |                       |                             |             | APRI<br>(0.75)                 | Liver biopsy<br>(F3)                          | nd       |

| PMID     | Author                                                                                                              | Year | Type of article           | Study design          | Population       | Sample size          | Description of Diagnostic Test |                                            | Timpoint |                      |                      |
|----------|---------------------------------------------------------------------------------------------------------------------|------|---------------------------|-----------------------|------------------|----------------------|--------------------------------|--------------------------------------------|----------|----------------------|----------------------|
|          |                                                                                                                     |      |                           |                       |                  |                      | Diagnostic test                | Reference standard (Sensitivity threshold) |          |                      |                      |
| 16371924 | Varaut A., Fontaine H., Serpaggi J., Verkarre V., Vallet-Pichard A., Nalpas B., Imbertbismuth F., Lebray P., Pol S. | 2005 | Peer-reviewed publication | Cross-sectional study | HD & Transplant  | 110                  | Fibrotest (>0.6)               | Liver biopsy (F2-F4)                       | nd       |                      |                      |
|          |                                                                                                                     |      |                           |                       |                  |                      | Fibrotest (≥0.2)               | Liver biopsy (F2-F4)                       |          |                      |                      |
|          |                                                                                                                     |      |                           |                       |                  |                      | Fibrotest (>0.6)               | Liver biopsy (F3-F4)                       |          |                      |                      |
|          |                                                                                                                     |      |                           |                       |                  |                      | Fibrotest (≥0.2)               | Liver biopsy (F3-F4)                       |          |                      |                      |
|          |                                                                                                                     |      |                           |                       |                  |                      | HD                             | 50                                         |          | Fibrotest (>0.6)     | Liver biopsy (F2-F4) |
|          |                                                                                                                     |      |                           |                       |                  |                      | Fibrotest (≥0.2)               |                                            |          | Liver biopsy (F2-F4) |                      |
|          |                                                                                                                     |      |                           |                       | Fibrotest (>0.6) | Liver biopsy (F3-F4) |                                |                                            |          |                      |                      |
|          |                                                                                                                     |      |                           |                       | Fibrotest (≥0.2) | Liver biopsy (F3-F4) |                                |                                            |          |                      |                      |
|          |                                                                                                                     |      |                           |                       | Transplant       | 60                   | Fibrotest (>0.6)               | Liver biopsy (F2-F4)                       |          |                      |                      |
|          |                                                                                                                     |      |                           |                       | Fibrotest (≥0.2) |                      | Liver biopsy (F2-F4)           |                                            |          |                      |                      |
|          |                                                                                                                     |      |                           |                       | Fibrotest (>0.6) |                      | Liver biopsy (F3-F4)           |                                            |          |                      |                      |
|          |                                                                                                                     |      |                           |                       | Fibrotest (≥0.2) |                      | Liver biopsy (F3-F4)           |                                            |          |                      |                      |

| PMID             | Author                                                                                                                                 | Year | Type of article           | Study design          | Population | Sample size | Description of Diagnostic Test |                                               |          |
|------------------|----------------------------------------------------------------------------------------------------------------------------------------|------|---------------------------|-----------------------|------------|-------------|--------------------------------|-----------------------------------------------|----------|
|                  |                                                                                                                                        |      |                           |                       |            |             | Diagnostic test                | Reference standard<br>(Sensitivity threshold) | Timpoint |
| 20847572         | Canbakan M., Senturk H.,<br>Canbakan B., Toptas T., Tabak O.,<br>Ozaras R., Tabak F., Balci H., Sut<br>N., Ozbay G.                    | 2011 | Peer-reviewed publication | Cross-sectional study | HD         | 33          | Fibrotest<br>(>0.19)           | Liver biopsy<br>(F2-F4)                       | nd       |
|                  |                                                                                                                                        |      |                           |                       |            |             | Fibrotest<br>(>0.6)            | Liver biopsy<br>(F2-F4)                       |          |
| 21393486         | Liu CH., Liang CC., Huang KW., Liu<br>CJ., Chen SI., Lin JW., Hung PH.,<br>Tsai HB., Lai MY., Chen PJ., Chen<br>JH., Chen DS., Kao JH. | 2011 | Peer-reviewed publication | Cross-sectional study | HD         | 304         | Fibroscan<br>(8.8)             | Liver biopsy<br>(F2-F4)                       | nd       |
|                  |                                                                                                                                        |      |                           |                       |            |             | Fibroscan<br>(7.1)             | Liver biopsy<br>(F2-F4)                       | nd       |
|                  |                                                                                                                                        |      |                           |                       |            |             | Fibroscan<br>(5.3)             | Liver biopsy<br>(F2-F4)                       | nd       |
|                  |                                                                                                                                        |      |                           |                       |            |             | Fibroscan<br>(9.5)             | Liver biopsy<br>(F3-4)                        | nd       |
|                  |                                                                                                                                        |      |                           |                       |            |             | Fibroscan<br>(9.6)             | Liver biopsy<br>(F3-4)                        | nd       |
|                  |                                                                                                                                        |      |                           |                       |            |             | Fibroscan<br>(8.3)             | Liver biopsy<br>(F3-4)                        | nd       |
| ATC-abstract 596 | A. Brar, M. Salifu, M. Rampal, N.<br>Sumrani, D. John, F. Tedla.                                                                       | 2012 | Abstract                  | Cross-sectional study | HD         | 26          | FIB-4                          | Liver biopsy<br>(F2-F4)                       |          |
| 20847572         | Canbakan M., Senturk H.,<br>Canbakan B., Toptas T., Tabak O.,<br>Ozaras R., Tabak F., Balci H., Sut<br>N., Ozbay G.                    | 2011 | Peer-reviewed publication | Cross-sectional study | HD         | 33          | ActiTest<br>(>0.11)            | Liver biopsy<br>(≥A2)                         |          |

**Table S1: Summary Table**  
**Diagnostic testing for liver fibrosis (by biopsy)**  
**Categorical outcomes**

| PMID     | Author                                                                                                                      | Year | Outcome  | Sensitivity (%) | Specificity (%) | ROC-AUC | Quality |
|----------|-----------------------------------------------------------------------------------------------------------------------------|------|----------|-----------------|-----------------|---------|---------|
| 20357753 | Liu CH., Liang CC., Liu CJ., Hsu SJ., Lin JW., Chen SI., Hung PH., Tsai HB., Lai MY., Chen PJ., Chen JH., Chen DS., Kao JH. | 2010 | Fibrosis | 97              | 23              | 0.83    | Good    |
|          |                                                                                                                             |      |          | 76              | 55              | 0.71    |         |
|          |                                                                                                                             |      |          | 84              | 51              |         |         |
|          |                                                                                                                             |      |          | 50              | 73              |         |         |
|          |                                                                                                                             |      |          | 61              | 90              |         |         |
|          |                                                                                                                             |      |          | 45              | 89              |         |         |
|          |                                                                                                                             |      |          | 45              | 95              |         |         |
|          |                                                                                                                             |      |          | 33              | 95              |         |         |
|          |                                                                                                                             |      |          | 32              | 96              |         |         |
|          |                                                                                                                             |      |          | 14              | 98              |         |         |
| 17634962 | Schiavon LL., Schiavon JL., Filho RJ., Sampaio JP., Lanzoni VP., Silva AE., Ferraz ML.                                      | 2007 | Fibrosis | 88              | 54              | 0.80    | Good    |
|          |                                                                                                                             |      |          | 44              | 93              |         |         |

| PMID             | Author                                                                                                                        | Year | Outcome  | Sensitivity (%) | Specificity (%) | ROC-AUC           | Quality |
|------------------|-------------------------------------------------------------------------------------------------------------------------------|------|----------|-----------------|-----------------|-------------------|---------|
|                  |                                                                                                                               |      |          | 95              | 69              | 0.84              |         |
|                  |                                                                                                                               |      |          | 42              | 89              |                   |         |
| 19758273         | Schiavon LL., Carvalho-Filho RJ., Narciso-Schiavon JL., Pinheiro SR., Barbosa DV., Lanzoni VP., Ferraz ML., Silva AE.         | 2010 | Fibrosis | 85              | 51              | 0.73              | Good    |
|                  |                                                                                                                               |      |          | 25              | 89              |                   |         |
| ATC-abstract 596 | A. Brar, M. Salifu, M. Rampal, N. Sumrani, D. John, F. Tedla.                                                                 | 2012 | Fibrosis | nd              | nd              | 0.81              | Fair    |
| 24353319         | Jiang Y., Huang E., Mehrnia A., Kamgar M., Pham PT., Ogunorunyinka O., Brown I., Danovitch GM., Bunnapradist S.               | 2014 | Fibrosis | 67              | 56              | nd                | Good    |
|                  |                                                                                                                               |      |          | 27              | 92              |                   |         |
| 21393486         | Liu CH., Liang CC., Huang KW., Liu CJ., Chen SI., Lin JW., Hung PH., Tsai HB., Lai MY., Chen PJ., Chen JH., Chen DS., Kao JH. | 2011 | Fibrosis | 3               | 100             | nd                | Good    |
|                  |                                                                                                                               |      | Fibrosis | 74              | 82              | 0.84 (0.79, 0.88) |         |
|                  |                                                                                                                               |      | Fibrosis | 79              | 70              | nd                |         |
|                  |                                                                                                                               |      | Fibrosis | 2               | 99              | nd                |         |
|                  |                                                                                                                               |      | Fibrosis | 93              | 90              | 0.93 (0.90, 0.97) |         |

| PMID     | Author                                                                                                              | Year | Outcome  | Sensitivity (%) | Specificity (%) | ROC-AUC | Quality |
|----------|---------------------------------------------------------------------------------------------------------------------|------|----------|-----------------|-----------------|---------|---------|
| 16371924 | Varaut A., Fontaine H., Serpaggi J., Verkarre V., Vallet-Pichard A., Nalpas B., Imbertbismuth F., Lebray P., Pol S. | 2005 | Fibrosis | 24              | 92              | 0.66    | Fair    |
|          |                                                                                                                     |      |          | 84              | 45              |         |         |
|          |                                                                                                                     |      |          | nd              | nd              | 0.70    |         |
|          |                                                                                                                     |      |          | nd              | nd              |         |         |
|          |                                                                                                                     |      |          | 14              | 97              | 0.47    |         |
|          |                                                                                                                     |      |          | 71              | 52              |         |         |
|          |                                                                                                                     |      |          | 30              | 98              | 0.66    |         |
|          |                                                                                                                     |      |          | 80              | 48              |         |         |
|          |                                                                                                                     |      |          | 69              | 88              | 0.71    |         |
|          |                                                                                                                     |      |          | 93              | 39              |         |         |
|          |                                                                                                                     |      |          | nd              | nd              | 0.72    |         |
|          |                                                                                                                     |      |          | 100             | 29              |         |         |

| PMID             | Author                                                                                                                                 | Year | Outcome                      | Sensitivity (%) | Specificity (%) | ROC-AUC           | Quality |
|------------------|----------------------------------------------------------------------------------------------------------------------------------------|------|------------------------------|-----------------|-----------------|-------------------|---------|
| 20847572         | Canbakan M., Senturk H.,<br>Canbakan B., Toptas T., Tabak O.,<br>Ozaras R., Tabak F., Balci H., Sut<br>N., Ozbay G.                    | 2011 | Fibrosis                     | 64              | 32              | 0.46 (0.25, 0.67) | Poor    |
|                  |                                                                                                                                        |      |                              | 13              | 84              |                   |         |
| 21393486         | Liu CH., Liang CC., Huang KW., Liu<br>CJ., Chen SI., Lin JW., Hung PH.,<br>Tsai HB., Lai MY., Chen PJ., Chen<br>JH., Chen DS., Kao JH. | 2011 | Fibrosis                     | 30              | 100             | nd                | Good    |
|                  |                                                                                                                                        |      | Fibrosis                     | 55              | 96              | nd                |         |
|                  |                                                                                                                                        |      | Fibrosis                     | 93              | 88              | 0.96 (0.94, 0.98) |         |
|                  |                                                                                                                                        |      | Fibrosis                     | 45              | 99              | nd                |         |
|                  |                                                                                                                                        |      | Fibrosis                     | 45              | 99              | nd                |         |
|                  |                                                                                                                                        |      | Fibrosis                     | 95              | 99              | 0.98 (0.97, 1.00) |         |
| ATC-abstract 596 | A. Brar, M. Salifu, M. Rampal, N.<br>Sumrani, D. John, F. Tedla.                                                                       | 2012 | Fibrosis                     | nd              | nd              | 0.54              | Fair    |
| 20847572         | Canbakan M., Senturk H.,<br>Canbakan B., Toptas T., Tabak O.,<br>Ozaras R., Tabak F., Balci H., Sut<br>N., Ozbay G.                    | 2011 | Activity (Necroinflammation) | 36              | 40              | 0.36 (0.15, 0.57) | Poor    |



**Table S2: Evidence profile: Diagnostic testing for liver fibrosis (by biopsy)**

| Diagnostic Test     | # of Studies | Total N of Patients | Methodological Quality of Studies | Consistency Across Studies          | Directness of the Evidence, including Applicability | Other Considerations | Summary of Findings             |                                                                                                                                                                                                                                                                                                |                       |
|---------------------|--------------|---------------------|-----------------------------------|-------------------------------------|-----------------------------------------------------|----------------------|---------------------------------|------------------------------------------------------------------------------------------------------------------------------------------------------------------------------------------------------------------------------------------------------------------------------------------------|-----------------------|
|                     |              |                     |                                   |                                     |                                                     |                      | Quality of Evidence for Outcome | Description of Findings                                                                                                                                                                                                                                                                        | Importance of Outcome |
| <b>APRI*</b>        | 5 studies    | 995                 | No limitations<br>(0)             | No important inconsistencies<br>(0) | Direct<br>(0)                                       | None<br>(0)          | High                            | F2-F4: AUC 0.73-0.83 (4 studies, transplant/HD)<br>APRI >0.4 Sn 84-88%, Sp 51-54% (2 studies, HD)<br>APRI >0.95 Sn 32-44%, Sp 93-96% (2 studies, HD) †<br>F3-F4: AUC 0.84 (1 study, HD)<br>APRI >0.4 Sn 67%, Sp 56% (1 of 2 studies, HD) ‡<br>APRI >0.95 Sn 27%, Sp 92% (1 of 2 studies, HD) § | High                  |
| <b>Fibroscan   </b> | 1 study      | 304                 | No limitations<br>(0)             | NA                                  | Direct<br>(0)                                       | Sparse data<br>(-1)  | Moderate                        | F2-F4: AUC 0.96 (1 study, HD)<br>F3-F4: AUC 0.98 (1 study, HD)                                                                                                                                                                                                                                 | High                  |
| <b>Fibrotest ¶</b>  | 2 studies    | 143                 | Some limitations<br>(-1)          | No important inconsistencies<br>(0) | Direct<br>(0)                                       | None<br>(0)          | Moderate                        | F2-F4: AUC 0.46-0.47 (2 studies, HD)<br>Fibrotest >0.2 Sn 64-71%, Sp 32-52% (2 studies)**<br>Fibrotest >0.6 Sn 13-14%, Sp 84-97% (2 studies) ††<br>F3-F4: AUC 0.66 (1 study, HD), AUC 0.72 (1 study, Txp)                                                                                      | High                  |
| <b>FIB-4 ‡‡</b>     | 1 study      | 26                  | Some limitations<br>(-1)          | NA                                  | Direct<br>(0)                                       | Sparse data<br>(-1)  | Low                             | AUC 0.54 (1 study, HD)                                                                                                                                                                                                                                                                         | High                  |
| <b>ActiTest §§</b>  | 1 study      | 33                  | Serious limitations<br>(-2)       | NA                                  | Indirect<br>(-1)                                    | Sparse data<br>(-1)  | Very Low                        | Predicting "Activity" (necroinflammation):<br>ActiTest >0.11 Sn 36%, Sp 40%, AUC 0.36                                                                                                                                                                                                          | High                  |

**Overall summary (and Quality of Overall Evidence):**

High quality evidence that APRI accurately diagnoses METAVIR F2-F4, sparse evidence that APRI accurately diagnoses F3-F4.

Sparse, moderate quality evidence that Fibroscan very accurately diagnoses F2-F4 and F3-F4.

Very Low to Moderate evidence that other tests (Fibrotest, FIB-4, ActiTest) do not accurately diagnose liver fibrosis (or necroinflammation).

**Studies included in EP:** 16371924, 20847572, 21393486, ATC-abstract 596, 20847572

**Abbreviations:** ALT = alanine aminotransferase, APRI = AST to platelet ratio index, AST = aspartate aminotransferase, AUC = area under the (receiver operating characteristics) curve, F2/F3/F4 = METAVIR scores, FIB4 = Fibrosis-4 test, GGT =  $\gamma$ -glutamyltranspeptidase, HD = hemodialysis, NA = not applicable (single study), Sn = sensitivity, Sp = specificity.

**Annotations:**

\* APRI = (AST level [U/L]/upper limit of normal)/platelet counts ( $10^9$ /liter) x 100

† Transplant population (1 study): APRI >0.50 Sn 85%, Sp 51%; APRI >1.5 Sn 25%, Sp 89%.

‡ 2nd HD study: APRI >0.55 Sn 95%, Sp 69%.

§ 2nd HD study: APRI >1.0 Sn 42%, Sp 89%.

|| Also known as transient elastography or liver stiffness measurement, based on proprietary ultrasonography.

¶ Proprietary test based on  $\alpha$ 2-macroglobulin, haptoglobin, apolipoprotein A1, GGT, total bilirubin, age and sex.

\*\* In transplant population (1 study): Fibrotest >0.2 Sn 93%, Sp 39%.

†† In transplant population (1 study): Fibrotest >0.6 Sn 69%, Sp 88%; AUC 0.71.

‡‡ FIB4 = age (years) x AST [U/L]/platelet count [ $10^9$ /L] x (ALT [U/L])<sup>1/2</sup>

§§ Proprietary test based on  $\alpha$ 2-macroglobulin, haptoglobin, apolipoprotein A1, GGT, total bilirubin, ALT, age and sex.

Table S3: Summary Table  
HCV infection as independent  
predictor of CKD progression

| PMID     | Author  | Year | Type of article           | Country | Study design               | Registry Name                                    | Population                                                                 | Sample Size, Total | CKD stage, baseline | Kidney function, baseline                                                  | HCV genotypes | Follow-up Time           | Predictor HCV+                                   | Predictor Definition                                                                                             | Predictor units                        | # w/Predictor or mean (95%)                 |                                                                    |
|----------|---------|------|---------------------------|---------|----------------------------|--------------------------------------------------|----------------------------------------------------------------------------|--------------------|---------------------|----------------------------------------------------------------------------|---------------|--------------------------|--------------------------------------------------|------------------------------------------------------------------------------------------------------------------|----------------------------------------|---------------------------------------------|--------------------------------------------------------------------|
| 25529816 | Molnar  | 2015 | Peer-reviewed publication | US      | Retrospective cohort study | nd                                               | US veterans with baseline GFR $\geq 60$ mL.min.1.73m2 with and without HCV | 1,021,049          | CKD 1-2             | HCV+: 93 $\pm$ 16<br>HCV-: 87 $\pm$ 16                                     | nd            | 7.8 years (IQR 6.8, 8.4) | HCV-<br>HCV+                                     | nd                                                                                                               | nd                                     | 920,531<br>100,518                          |                                                                    |
|          |         |      |                           |         |                            |                                                  |                                                                            |                    |                     |                                                                            |               | 8.0 years (IQR 7.1, 8.5) | HCV-<br>HCV+                                     | nd                                                                                                               | nd                                     | 920,531<br>100,518                          |                                                                    |
|          |         |      |                           |         |                            |                                                  |                                                                            |                    |                     |                                                                            |               |                          |                                                  | detectable RNA                                                                                                   |                                        |                                             |                                                                    |
| 23904290 | Lucas   | 2013 | Peer-reviewed publication | US      | Retrospective cohort study | NA-ACCORD                                        | HIV+ adults                                                                | 63,023             | CKD 0-5             | GFR >90 70%<br>GFR 60-89 26%<br>GFR 30-59 3.4%<br>GFR 15-29 0.4%           | nd            | nd                       | HCV viremic<br>HCV aviremic<br>HCV-              | seropositive, undetectable RNA                                                                                   |                                        | 57,854 pt-yr<br>4769 pt-yr<br>269,805 pt-yr |                                                                    |
|          |         |      |                           |         |                            |                                                  |                                                                            |                    |                     | GFR <15 0.7%                                                               |               |                          |                                                  | detectable RNA                                                                                                   |                                        | 61 833 pt-yr<br>5139 pt-yr<br>287,386 pt-yr |                                                                    |
|          |         |      |                           |         |                            |                                                  |                                                                            |                    |                     |                                                                            |               |                          |                                                  | detectable RNA                                                                                                   |                                        | 59 892 pt-yr<br>4952 pt-yr<br>279 096 pt-yr |                                                                    |
| 20400217 | Lee     | 2010 | Peer-reviewed publication | Taiwan  | Cross-sectional study      | Taiwanese National Health Insurance Program      | Adults                                                                     | 54,966             | CKD 1-5             | GFR $\geq 90$ : 27.7%<br>GFR 60-89: 57.9%<br>GFR 30-59: 13.7%<br>GFR <0.8% | nd            | nd                       | HCV alone<br>HCV alone<br>HCV alone<br>HCV alone | seropositive<br>seropositive<br>seropositive<br>seropositive                                                     | nd<br>nd<br>nd<br>nd                   | 5,189<br>5,189<br>5,189<br>5,189            |                                                                    |
| 21386707 | Hofmann | 2011 | Peer-reviewed publication | Sweden  | Retrospective cohort study | Swedish Institute for Infectious Disease Control | HCV and matched controls                                                   | 43,000             | nd                  | nd                                                                         | nd            | nd                       | nd                                               | MALES<br>HCV-infected<br>HCV-infected<br>HCV-infected<br>HCV-infected<br>FEMALES<br>HCV-infected<br>HCV-infected | nd<br>nd<br>nd<br>nd<br>nd<br>nd<br>nd | nd<br>nd<br>nd<br>nd<br>nd<br>nd<br>nd      | 25,412<br>25,412<br>25,412<br>25,412<br>25,412<br>25,412<br>25,412 |

| PMID     | Author   | Year | Type of article           | Country | Study design               | Registry Name                                                                         | Population                                | Sample Size, Total                     | CKD stage, baseline                                     | Kidney function, baseline                            | HCV genotypes | Follow-up Time                                                            | Predictor                                            | Predictor Definition                                         | Predictor units      | # w/Predictor or mean (95%)                                         |
|----------|----------|------|---------------------------|---------|----------------------------|---------------------------------------------------------------------------------------|-------------------------------------------|----------------------------------------|---------------------------------------------------------|------------------------------------------------------|---------------|---------------------------------------------------------------------------|------------------------------------------------------|--------------------------------------------------------------|----------------------|---------------------------------------------------------------------|
|          |          |      |                           |         |                            |                                                                                       |                                           |                                        |                                                         |                                                      |               |                                                                           | HCV-infected                                         | nd                                                           | nd                   | 25,412                                                              |
|          |          |      |                           |         |                            |                                                                                       |                                           |                                        |                                                         |                                                      |               |                                                                           | HCV-infected                                         | nd                                                           | nd                   | 25,412                                                              |
| 18371161 | Ishizaka | 2008 | Peer-reviewed publication | Japan   | Cross-sectional study      | General Health Screen at Mitsui Memorial Hospital                                     | Working adults                            | 12,535                                 | nd                                                      | Hep B - and Hep C -: 70 ± 10                         | nd            | nd                                                                        | HCV +                                                | HCV Ag +                                                     | nd                   | 72                                                                  |
|          |          |      |                           |         |                            |                                                                                       |                                           |                                        |                                                         | Hep B +: 70 ± 9<br>Hep C +: 67 ± 13                  |               |                                                                           | HCV - and HBV -                                      | HCV Ag - and HBV Ag -                                        | nd                   | 12,333                                                              |
|          |          |      |                           |         |                            |                                                                                       |                                           |                                        |                                                         |                                                      |               |                                                                           | HCV +                                                | HCV Ag +                                                     | nd                   | 72                                                                  |
|          |          |      |                           |         |                            |                                                                                       |                                           |                                        |                                                         |                                                      |               |                                                                           | HCV - and HBV -                                      | HCV Ag - and HBV Ag -                                        | nd                   | 12,333                                                              |
|          |          |      |                           |         |                            |                                                                                       |                                           |                                        |                                                         |                                                      |               |                                                                           | HCV +                                                | HCV Ag +                                                     | nd                   | 72                                                                  |
|          |          |      |                           |         |                            |                                                                                       |                                           |                                        |                                                         |                                                      |               |                                                                           | HCV - and HBV -                                      | HCV Ag - and HBV Ag -                                        | nd                   | 12,333                                                              |
| 23311442 | Cao      | 2013 | Peer-reviewed publication | China   | Cross-sectional Study      | nd                                                                                    | HIV infected antiretroviral therapy-naive | 538                                    | nd                                                      | Non-CKD: 113.54 ± 24.06                              | nd            | nd                                                                        | HCV +                                                | HCV Ab +                                                     | nd                   | 80                                                                  |
|          |          |      |                           |         |                            |                                                                                       |                                           |                                        | nd                                                      | CKD: 98.98 ± 34.48                                   |               |                                                                           | HCV -                                                | HCV Ab -                                                     | nd                   | 444                                                                 |
|          |          |      |                           |         |                            |                                                                                       |                                           |                                        |                                                         |                                                      |               |                                                                           |                                                      | seropositive                                                 | nd                   | 178,447 pt-yr                                                       |
| 17592100 | Tsui     | 2007 | Peer-reviewed             | US      | Retrospective Cohort Study | Medicare, the Department of Veterans Affairs, and the United States Renal Data System | US Veterans                               | 474,369                                | HCV+: 9.4% with any stage<br>HCV-: 16.6% with any stage | HCV+<br>GFR>=60: 83%<br>GFR 30-59: 15%<br>GFR<30: 2% | nd            | 3.4y (median 3.6y)                                                        | HCV+<br>HCV-<br>HCV+, eGFR >= 60<br>HCV-, eGFR >= 61 | seronegative<br>seropositive<br>seronegative<br>seropositive | nd<br>nd<br>nd<br>nd | 1,442,826 pt-yr<br>163,846 pt-yr<br>1,219,523 pt-yr<br>13,295 pt-yr |
|          |          |      |                           |         |                            |                                                                                       |                                           |                                        |                                                         | HCV-<br>GFR>=60: 91%                                 |               |                                                                           | HCV+, eGFR 30-59<br>HCV-, eGFR 30-59                 | seronegative<br>seropositive                                 | nd<br>nd             | 207,484 pt-yr<br>1,307 pt-yr                                        |
|          |          |      |                           |         |                            |                                                                                       |                                           |                                        |                                                         | GFR 30-59: 8%                                        |               |                                                                           | HCV+, eGFR <30                                       | seronegative                                                 | nd                   | 15,819 pt-yr                                                        |
|          |          |      |                           |         |                            |                                                                                       |                                           |                                        |                                                         | GFR<30: 2%                                           |               |                                                                           | HCV-, eGFR <30                                       |                                                              |                      |                                                                     |
| 26526451 | Rogal    | 2016 | Peer-reviewed             | US      | Retrospective Cohort Study | HCV Infected Veterans (ERCHIVES)                                                      | US Veterans                               | 71,528                                 |                                                         |                                                      |               | 1: 33.14%, 2: 4.75%, 3: 5.25%, 4: 0.35%,<br>Mixed: 0.08%, Missing: 56.43% | HCV+: 5.99 (SD 2.84)y<br>HCV-: 4.91 (SD 2.16)y       | HCV+<br>HCV-<br>HCV+                                         | nd<br>nd<br>nd       | nd<br>nd<br>nd                                                      |
| 22554802 | Su       | 2012 | Peer-reviewed             | Taiwan  | Retrospective Case Control | Taiwan National Health Insurance Research Database                                    | Taiwanese adults                          | 37,746                                 |                                                         |                                                      |               | nd                                                                        | 5.58 (SD 2.04)                                       | HCV+<br>HCV-                                                 |                      | 32,648 pt-yr<br>176,921 pt-yr                                       |
| 26817874 | Hwang    | 2016 | Peer-reviewed             | Taiwan  | Retrospective Case Control | Longitudinal Cohort of Diabetes Patients                                              | DM                                        | 19,574                                 |                                                         |                                                      |               | nd                                                                        | 12 y                                                 | HCV+<br>HCV-                                                 |                      | nd                                                                  |
| 16524948 | Tsui     | 2006 | Peer-reviewed publication | US      | Cross-sectional            | NHANES III                                                                            | US general population                     | 15029 (366 HCV+)                       | nd                                                      | HCV+: 110 (106-114)<br>HCV-: 100 (99-101)            | nd            | nd                                                                        | HCV+<br>HCV-<br>HCV+<br>HCV-                         | nd<br>nd<br>nd<br>nd                                         | nd<br>nd<br>nd<br>nd | 366<br>14,663<br>366<br>14,663<br>100,518<br>920,531                |
| 19747988 | Asrani   | 2010 | Peer-reviewed publication | US      | Retrospective cohort study | Conglomerate of health insurance carriers database, NOS                               | US adults                                 | 167,569                                | CKD 0-5                                                 | GFR >60 95%<br>GFR 30-59 5.0%                        | nd            | nd                                                                        | HCV+<br>HCV -                                        | EIA, NAT, genotype test                                      |                      | 13,384<br>154,185                                                   |
|          |          |      |                           |         |                            |                                                                                       |                                           |                                        |                                                         | GFR 15-29 0.2%<br>GFR <15 0.1%                       |               |                                                                           | HCV+<br>HCV -                                        | EIA, NAT, genotype test                                      |                      | 8,063<br>80,759                                                     |
| 24257691 | Chen     | 2014 | Peer-reviewed publication | Taiwan  | Retrospective cohort study | Taiwan National Health Insurance Research Database                                    | Taiwanese adults (no renal Txp)           | 9430 HCV+ and 3772 Non-CKD (per ICD-9) |                                                         | nd                                                   | nd            | ~7 years                                                                  | HCV +                                                | ICD-9 codes                                                  |                      | 9,430                                                               |

| PMID     | Author | Year | Type of article           | Country   | Study design               | Registry Name | Population                                     | Sample Size, Total | CKD stage, baseline   | Kidney function, baseline | HCV genotypes | Follow-up Time       | Predictor | Predictor Definition       | Predictor units | # w/Predictor or mean (95%) |
|----------|--------|------|---------------------------|-----------|----------------------------|---------------|------------------------------------------------|--------------------|-----------------------|---------------------------|---------------|----------------------|-----------|----------------------------|-----------------|-----------------------------|
|          |        |      |                           |           |                            |               |                                                |                    |                       |                           |               |                      | HCV-      |                            |                 | 37,720 (matched)            |
| 25826420 | Mcroft | 2015 | Peer-reviewed publication | Europe, U | Prospective cohort study   | nd            | HIV+                                           | 17,594             | Healthy (not CKD)     | median: 104               | nd            | 103,185 person-years | HCV +     | nd                         |                 | 2,262                       |
|          |        |      |                           |           |                            |               |                                                |                    |                       |                           |               |                      | HCV -     | nd                         |                 | 11,386                      |
| 21185632 | Butt   | 2011 | Peer-reviewed publication | US        | Retrospective cohort study | ERCHIVES      | HCV infected patients, HCV-uninfected controls | 43,139             | Healthy (not CKD 3-5) | HCV+: 99 (22.6)           | nd            | HCV+: 3.15 (1.4) y   | HCV +     | anti-HCV Ab + or HCV RNA + |                 | 18,002                      |
|          |        |      |                           |           |                            |               |                                                |                    |                       | HCV-: 92 (22.2)           |               | HCV-: 3.00 (1.3) y   | HCV -     | anti-HCV Ab - or HCV RNA - |                 | 25,137                      |
| 22994610 | Bickel | 2015 | Peer-reviewed publication | Germany   | Prospective cohort study   | nd            | HIV+                                           | 9198               | Not ESRD              | nd                        | nd            | 5 years max          | HCV +     |                            |                 | 1008                        |
|          |        |      |                           |           |                            |               |                                                |                    |                       |                           |               |                      | HCV -     |                            |                 | 4330 (+3860 unknown)        |

Table S3: Summary Table  
HCV infection as independent  
predictor of CKD progression

| PMID                                   | Author                                                                                                                                                                         | Year              | Outcome                                                                                     | Outcome Definition                                                                                                                                                                                                                                                                                                                       | Cases (# w/Outcome) | Rate                                                         | Adjustments (reject if none)                                                                                                                                                                                                                                                                                                             | Metric (HR, OR, RR, beta, change) | Estimate (95% CI)                      | Comparison           | P_value  | Risk of bias |
|----------------------------------------|--------------------------------------------------------------------------------------------------------------------------------------------------------------------------------|-------------------|---------------------------------------------------------------------------------------------|------------------------------------------------------------------------------------------------------------------------------------------------------------------------------------------------------------------------------------------------------------------------------------------------------------------------------------------|---------------------|--------------------------------------------------------------|------------------------------------------------------------------------------------------------------------------------------------------------------------------------------------------------------------------------------------------------------------------------------------------------------------------------------------------|-----------------------------------|----------------------------------------|----------------------|----------|--------------|
| 25529816                               | Molnar                                                                                                                                                                         | 2015              | GFR<60 incidence                                                                            | the presence of two consecutive eGFR values of <60 mL/min/1.73 m <sup>2</sup> at least 90 days apart with the added stipulation that the decrease in eGFR should be at least 25% from the baseline eGFR                                                                                                                                  | 11,271<br>95,837    | 16.7 (16.4,17.0)/1000 pt-yr<br>14.9 (14.8,15.0)/1000 pt-yr   | age, gender, race/ethnicity, baseline GFR, comorbidities, SBP, DBP, BMI, socio-demographic parameters                                                                                                                                                                                                                                    | HR                                | 1.15 (1.12, 1.17)                      | vs. HCV-             | nd       | LOW          |
|                                        |                                                                                                                                                                                |                   | GFR loss >5 mL/min/1.73m <sup>2</sup> /year                                                 | Rapid deterioration was defined as slopes of < -5 mL/min/1.73 m <sup>2</sup> /year (i.e., loss of eGFR of >5 mL/min/1.73 m <sup>2</sup> /year).                                                                                                                                                                                          | nd<br>nd            | nd<br>nd                                                     | age, gender, race/ethnicity, baseline GFR, comorbidities, SBP, DBP, BMI, socio-demographic parameters                                                                                                                                                                                                                                    | OR                                | 1.22 (1.19, 1.26)                      | vs. HCV-             | nd       |              |
|                                        |                                                                                                                                                                                |                   | ESRD                                                                                        | initiation of renal replacement therapy or preemptive transplant                                                                                                                                                                                                                                                                         | 904<br>2479         | 1.2 (1.1, 1.3)/1000 pt-yr<br>0.36 (0.34, 0.37)/1000 pt-yr    | age, gender, race/ethnicity, baseline GFR, comorbidities, SBP, DBP, BMI, socio-demographic parameters                                                                                                                                                                                                                                    | HR                                | 1.98 (1.81, 2.16)                      | vs. HCV-             | nd       |              |
| 23904290                               | Lucas                                                                                                                                                                          | 2013              | CKD 3                                                                                       | GFR<60 for >=90 d                                                                                                                                                                                                                                                                                                                        | 1666                | 28.8 (27.5, 30.2)/1000 pt-yr                                 | Age, sex, race, history of injection drug use, hepatitis B surface antigen positivity, baseline glomerular filtration rate, and time-updated covariates including calendar year, CD4 cell count, HIV RNA, antiretroviral therapy use, tenofovir use, indinavir use, lopinavir/ritonavir use, atazanavir use, hypertension, and diabetes. | HR                                | 1.36 (1.26, 1.46)<br>1.19 (0.98, 1.45) | vs. HCV-<br>vs. HCV- | nd<br>nd | LOW          |
|                                        |                                                                                                                                                                                |                   |                                                                                             |                                                                                                                                                                                                                                                                                                                                          | 122<br>5090         | 25.6 (21.4, 30.6)/1000 pt-yr<br>18.9 (18.4, 19.4)/1000 pt-yr |                                                                                                                                                                                                                                                                                                                                          |                                   |                                        |                      |          |              |
|                                        |                                                                                                                                                                                |                   | CKD 5                                                                                       | GFR<15 for >=90 d                                                                                                                                                                                                                                                                                                                        | 376                 | 6.1 (5.5, 6.7)/1000 pt-yr                                    | Age, sex, race, history of injection drug use, hepatitis B surface antigen positivity, baseline glomerular filtration rate, and time-updated covariates including calendar year, CD4 cell count, HIV RNA, antiretroviral therapy use, tenofovir use, indinavir use, lopinavir/ritonavir use, atazanavir use, hypertension, and diabetes. | HR                                | 1.95 (1.64, 2.31)<br>1.69 (1.07, 2.65) | vs. HCV-<br>vs. HCV- | nd<br>nd |              |
|                                        |                                                                                                                                                                                |                   |                                                                                             |                                                                                                                                                                                                                                                                                                                                          | 23<br>699           | 4.4 (2.9, 6.7)/1000 pt-yr<br>2.4 (2.3, 2.6)/1000 pt-yr       |                                                                                                                                                                                                                                                                                                                                          |                                   |                                        |                      |          |              |
| CKD decline                            | ≥25% GFR decline from baseline to a GFR < 60 mL/min/1.73 m <sup>2</sup> that persisted for at least 90 days among subjects with baseline GFR ≥ 30 mL/min/1.73 m <sup>2</sup> . | 984<br>76<br>2885 | 16.4 (15.4, 17.5)/1000 pt-yr<br>15.4 (12.3, 19.2)/1000 pt-yr<br>10.3 (9.9, 10.7)/1000 pt-yr | Age, sex, race, history of injection drug use, hepatitis B surface antigen positivity, baseline glomerular filtration rate, and time-updated covariates including calendar year, CD4 cell count, HIV RNA, antiretroviral therapy use, tenofovir use, indinavir use, lopinavir/ritonavir use, atazanavir use, hypertension, and diabetes. | HR                  | 1.31 (1.19, 1.44)<br>1.31 (1.02, 1.68)                       | vs. HCV-<br>vs. HCV-                                                                                                                                                                                                                                                                                                                     | nd<br>nd                          |                                        |                      |          |              |
| 20400217                               | Lee                                                                                                                                                                            | 2010              | CKD                                                                                         | determined by eGFR and proteinuria based on the K/DOQI definition                                                                                                                                                                                                                                                                        | nd                  | nd                                                           | age, sex, educational status, BMA, albumin, Hb, cholesterol, uric acid, HTN, and DM                                                                                                                                                                                                                                                      | OR                                | 1.26 (1.17, 1.38)                      | vs. HBV or HBV/HCV   | <0.001   | HIGH         |
|                                        |                                                                                                                                                                                |                   | CKD                                                                                         | defined using GFR estimated using the 6-variable MDRD Study equation                                                                                                                                                                                                                                                                     | nd                  | nd                                                           | age, sex, educational status, BMA, albumin, Hb, cholesterol, uric acid, HTN, and DM                                                                                                                                                                                                                                                      | OR                                | 1.23 (1.14, 1.34)                      | vs. HBV or HBV/HCV   | <0.001   |              |
|                                        |                                                                                                                                                                                |                   | proteinuria                                                                                 | presence of urine protein of at least grade 1+ in repeated measures                                                                                                                                                                                                                                                                      | nd                  | nd                                                           | age, sex, educational status, BMA, albumin, Hb, cholesterol, uric acid, HTN, and DM                                                                                                                                                                                                                                                      | OR                                | 1.14 (1.003, 1.300)                    | vs. HBV or HBV/HCV   | 0.04     |              |
|                                        |                                                                                                                                                                                |                   | low GFR                                                                                     | eGFR <60 mL/min/1.73 m <sup>2</sup>                                                                                                                                                                                                                                                                                                      | nd                  | nd                                                           | age, sex, educational status, BMA, albumin, Hb, cholesterol, uric acid, HTN, and DM                                                                                                                                                                                                                                                      | OR                                | 1.30 (1.20, 1.42)                      | vs. HBV or HBV/HCV   | <0.001   |              |
| 21386707                               | Hofmann                                                                                                                                                                        | 2011              | glomerular diseases                                                                         | risk of hospitalization for glomerular disease; ICD-9 codes: 580–583, ICD-10 codes: N00–N08                                                                                                                                                                                                                                              | 104                 | nd                                                           | age, sex, and interaction between HCV status and sex                                                                                                                                                                                                                                                                                     | HR                                | 2.9 (2.0, 4.3)                         | vs. no HCV infection | nd       | HIGH         |
| renal failure                          | risk of hospitalization for renal failure; ICD-9 codes: 584–586, ICD-10 codes: N17–N19                                                                                         | 245               | nd                                                                                          | age, sex, and interaction between HCV status and sex                                                                                                                                                                                                                                                                                     | HR                  | 4.6 (3.7, 5.8)                                               | vs. no HCV infection                                                                                                                                                                                                                                                                                                                     | nd                                |                                        |                      |          |              |
| other kidney diseases                  | risk of hospitalization for other kidney diseases; ICD-9 codes: 587–589 and 593, ICD-10 codes: N25–N28                                                                         | 30                | nd                                                                                          | age, sex, and interaction between HCV status and sex                                                                                                                                                                                                                                                                                     | HR                  | 2.9 (1.4, 6.0)                                               | vs. no HCV infection                                                                                                                                                                                                                                                                                                                     | nd                                |                                        |                      |          |              |
| all noncancer kidney diseases combined | risk of hospitalization for combination of above                                                                                                                               | 349               | nd                                                                                          | age, sex, and interaction between HCV status and sex                                                                                                                                                                                                                                                                                     | HR                  | 3.9 (3.2, 4.8)                                               | vs. no HCV infection                                                                                                                                                                                                                                                                                                                     | nd                                |                                        |                      |          |              |
| glomerular diseases                    | risk of hospitalization for glomerular disease; ICD-9 codes: 580–583, ICD-10 codes: N00–N08                                                                                    | 34                | nd                                                                                          | age, sex, and interaction between HCV status and sex                                                                                                                                                                                                                                                                                     | HR                  | 5.1 (3.0, 8.8)                                               | vs. no HCV infection                                                                                                                                                                                                                                                                                                                     | nd                                |                                        |                      |          |              |
| renal failure                          | risk of hospitalization for renal failure; ICD-9 codes: 584–586, ICD-10 codes: N17–N19                                                                                         | 59                | nd                                                                                          | age, sex, and interaction between HCV status and sex                                                                                                                                                                                                                                                                                     | HR                  | 7.2 (4.9, 10.6)                                              | vs. no HCV infection                                                                                                                                                                                                                                                                                                                     | nd                                |                                        |                      |          |              |

| PMID     | Author   | Year | Outcome                                | Outcome Definition                                                                                     | Cases (# w/Outcome) | Rate                              | Adjustments (reject if none)                                                                                                                                                                                                                                                                                 | Metric (HR, OR, RR, beta, change) | Estimate (95% CI)    | Comparison           | P_value | Risk of bias |
|----------|----------|------|----------------------------------------|--------------------------------------------------------------------------------------------------------|---------------------|-----------------------------------|--------------------------------------------------------------------------------------------------------------------------------------------------------------------------------------------------------------------------------------------------------------------------------------------------------------|-----------------------------------|----------------------|----------------------|---------|--------------|
|          |          |      | other kidney diseases                  | risk of hospitalization for other kidney diseases; ICD-9 codes: 587-589 and 593, ICD-10 codes: N25-N28 | 4                   | nd                                | age, sex, and interaction between HCV status and sex                                                                                                                                                                                                                                                         | HR                                | 10.0 (2.7, 37.2)     | vs. no HCV infection | nd      |              |
|          |          |      | all noncancer kidney diseases combined | risk of hospitalization for combination of above                                                       | 94                  | nd                                | age, sex, and interaction between HCV status and sex                                                                                                                                                                                                                                                         | HR                                | 5.8 (4.2, 7.9)       | vs. no HCV infection | nd      |              |
| 18371161 | Ishizaka | 2008 | Low eGFR                               | eGFR<60 mL/min/1.73 m2                                                                                 | 22                  | 31%                               | age, sex, SBP, and FPG                                                                                                                                                                                                                                                                                       | OR                                | 1.63 (0.95, 2.80)    | vs. HCV - and HBV -  | 0.077   | HIGH         |
|          |          |      | Albuminuria                            | UAER of 330 mg/g                                                                                       | 14                  | 19%                               | age, sex, SBP, and FPG                                                                                                                                                                                                                                                                                       | OR                                | 2.00 (1.06, 3.76)    | vs. HCV - and HBV -  | 0.034   |              |
|          |          |      | CKD                                    | eGFR<60 mL/min/1.73 m2, or UAER of 330 mg/g                                                            | 1157                | 9%                                | age, sex, SBP, and FPG                                                                                                                                                                                                                                                                                       | OR                                | 1.83 (1.10, 3.05)    | vs. HCV - and HBV -  | 0.02    |              |
|          |          |      |                                        |                                                                                                        | nd                  | nd                                |                                                                                                                                                                                                                                                                                                              |                                   |                      |                      |         |              |
| 23311442 | Cao      | 2013 | CKD                                    | GFR < 60 mL/min per 1.73 m2 and/or isolated proteinuria (>= 1+ on urine dipstick) for 3 months         | 20                  | 25%                               | age, HIV viral load                                                                                                                                                                                                                                                                                          | OR                                | 2.074 (1.036, 4.149) | vs. HCV -            | 0.011   | HIGH         |
|          |          |      |                                        |                                                                                                        | 64                  | 14%                               |                                                                                                                                                                                                                                                                                                              |                                   |                      |                      |         |              |
| 17592100 | Tsui     | 2007 | ESRD                                   | onset of chronic dialysis or renal transplantation                                                     | 760                 | 4.26 (3.97-4.57)/1000 pt-yr       | age, sex, race/ethnicity, diabetes mellitus, hypertension, human immunodeficiency virus infection, congestive heart failure, coronary heart disease, peripheral vascular disease, chronic obstructive pulmonary disease, cerebrovascular disease, substance abuse, and baseline eGFR, also stratified by age | HR                                | 1.68 (1.54-1.82)     | vs. HCV-             | nd      | LOW          |
|          |          |      |                                        |                                                                                                        | 4393                | 3.05 (2.96-3.14)/1000 pt-yr       |                                                                                                                                                                                                                                                                                                              | HR                                | 2.74 (2.13-3.51)     | vs. HCV-             | nd      |              |
|          |          |      |                                        |                                                                                                        | 106                 | 0.65 (0.54-0.78)/1000 pt-yr       |                                                                                                                                                                                                                                                                                                              | HR                                | 2.57 (2.20-3.01)     | vs. HCV-             | nd      |              |
|          |          |      |                                        |                                                                                                        | 308                 | 0.25 (0.23-0.28)/1000/ pt-yr      |                                                                                                                                                                                                                                                                                                              | HR                                | 1.28 (1.15-1.44)     | vs. HCV-             | nd      |              |
|          |          |      |                                        |                                                                                                        | 228                 | 17.15 (15.06-19.53)/1000 pt-yr    |                                                                                                                                                                                                                                                                                                              | HR                                |                      |                      |         |              |
|          |          |      |                                        |                                                                                                        | 1039                | 5.01 (4.71-5.32)/1000 pt-yr       |                                                                                                                                                                                                                                                                                                              | HR                                |                      |                      |         |              |
|          |          |      |                                        |                                                                                                        | 426                 | 326.03 (296.49-358.50)/1000 pt-yr |                                                                                                                                                                                                                                                                                                              | HR                                |                      |                      |         |              |
|          |          |      |                                        |                                                                                                        | 3046                | 192.55 (185.83-199.51)/1000 pt-yr |                                                                                                                                                                                                                                                                                                              |                                   |                      |                      |         |              |
| 26526451 | Rogal    | 2016 | CKD 3-5                                |                                                                                                        | nd                  | nd                                | baseline GFR with FIB-4 included as a time-varying covariate                                                                                                                                                                                                                                                 | HR                                | 0.86 (0.79, 0.92)    | HCV+ vs. HCV-        | <0.0001 | LOW          |
|          |          |      | Progressive CKD                        | decline in eGFR of >= 30 from baseline                                                                 | nd                  | nd                                | baseline GFR with FIB-4 included as a time-varying covariate                                                                                                                                                                                                                                                 | HR                                | 0.93 (0.86, 1.00)    | HCV+ vs. HCV-        | 0.06    |              |
| 22554802 | Su       | 2012 | ESRD                                   |                                                                                                        | 77                  |                                   | age, sex, occupation, urbanization, and Charlson Comorbidity Index score                                                                                                                                                                                                                                     | HR                                | 1.53 (1.17, 2.01)    | vs. HCV-             | 0.002   | LOW          |
|          |          |      |                                        |                                                                                                        | 196                 |                                   | results also stratified by age, sex, and followup interval                                                                                                                                                                                                                                                   |                                   |                      |                      |         |              |
| 26817874 | Hwang    | 2016 | ESRD                                   |                                                                                                        | nd                  | nd                                | sex, age at index date and various comorbidities including hypertension, CAD, hyperlipidemia, HBV infection, gout and liver cirrhosis                                                                                                                                                                        | HR                                | 1.47 (1.11-1.93)     | vs. HCV-             | <0.05   | LOW          |
| 16524948 | Tsui     | 2006 | GFR<60 prevalence                      | eGFR <60                                                                                               | 366                 | 2.0 (1.1,3.6) %                   | age, gender, race/ethnicity, educational status, smoking status, DM,and HTN                                                                                                                                                                                                                                  | OR                                | 0.89 (0.49, 1.62)    | vs. HCV-             | 0.7     | LOW          |
|          |          |      | Albuminuria prevalence                 | Albuminuria                                                                                            | 14,663              | 4.3 (3.7,4.9) %                   | age, gender, race/ethnicity, educational status, smoking status, DM,and HTN                                                                                                                                                                                                                                  | OR                                | 1.22 (1.19, 1.26)    | vs. HCV-             | nd      |              |
| 19747988 | Asrani   | 2010 | CKD prevalence (baseline)              | GFR<60 (single measurement)                                                                            | 13,384              | 5.3%                              | Age, sex, cirrhosis, DM, HTN, CHF, PVD, CAD, COPD, HIV, drug/alcohol abuse, depression                                                                                                                                                                                                                       | OR                                | 0.90 (0.36, 2.27)    | vs. HCV-             | 0.7     | LOW          |
|          |          |      | Progression to CKD                     | GFR <60 without baseline CKD                                                                           | 154,185             | 5.1%                              | Age, sex, cirrhosis, DM, HTN, CHF, PVD, CAD, COPD, HIV, drug/alcohol abuse, depression                                                                                                                                                                                                                       | OR                                | 0.92 (0.79, 1.08)    | vs. HCV-             |         |              |
| 24257691 | Chen     | 2014 | CKD, incident                          | ICD-9 code                                                                                             | 367                 | 3.9% (5.46/1000 person-yr)        | age per year, sex, comorbidities, geographic region, urbanization level, enrollee category, and number of medical visits in 1 year before study entry                                                                                                                                                        | HR                                | 1.28 (1.12, 1.46)    | vs HCV-              | <0.001  | LOW          |

| PMID     | Author  | Year | Outcome | Outcome Definition                         | Cases (# w/Outcome) | Rate                       | Adjustments (reject if none)                                                                                                                   | Metric (HR, OR, RR, beta, change) | Estimate (95% CI) | Comparison | P_value             | Risk of bias |
|----------|---------|------|---------|--------------------------------------------|---------------------|----------------------------|------------------------------------------------------------------------------------------------------------------------------------------------|-----------------------------------|-------------------|------------|---------------------|--------------|
|          |         |      |         |                                            | 960                 | 2.5% (3.43/1000 person-yr) |                                                                                                                                                |                                   |                   |            |                     |              |
| 25826420 | Mocroft | 2015 | CKD     | eGFR <= 60 mL/min per 1.73 m2 (>3mo)       | 89                  | 13.9%                      | age, sex, HIV risk, eGFR, nadir CD4 <200, HTN, prior CVD, diabetes                                                                             | OR [exp(beta)]                    | 1.40 (nd)         | vs. HCV -  | nd (at least <0.10) | HIGH         |
|          |         |      |         |                                            | 391                 | 61.0%                      |                                                                                                                                                |                                   |                   |            |                     |              |
| 21185632 | Butt    | 2011 | CKD 3-5 | eGFR < 60 mL/min per 1.73 m2 for >=2 times | 3,140               | 17.4%                      | age, sex, race, eGFR, HTN, smoking, COPD, diabetes, dyslipidemia, anemia, alcohol abuse, drug abuse, decompensated liver disease, ACEi/ARB use | HR                                | 1.30 (1.23, 1.37) | vs. HCV -  | < 0.0001            | LOW          |
|          |         |      |         |                                            | 3,738               | 14.9%                      |                                                                                                                                                |                                   |                   |            |                     |              |
| 22994610 | Bickel  | 2015 | ESRD    | Initiation of RRT                          | ~13                 | nd                         | race (black), intravenous drug use (sex, AIDS, HBV coinfection were NS)                                                                        |                                   | 0.84 (0.24, 2.86) | vs. HCV -  | 0.79                | UNCLEAR      |
|          |         |      |         |                                            | ~22                 | nd                         |                                                                                                                                                |                                   |                   |            |                     |              |

**Table S4: Evidence profile: HCV infection as independent predictor of CKD progression**

| Outcome                           | # of Studies and Study Design*          | Total N of Participants   | Methodological Quality of Studies | Consistency Across Studies        | Directness of the Evidence, including Applicability | Other Considerations | Summary of Findings                 |                                                                                                                                                                                                                                                                                                                                                                    |                       |
|-----------------------------------|-----------------------------------------|---------------------------|-----------------------------------|-----------------------------------|-----------------------------------------------------|----------------------|-------------------------------------|--------------------------------------------------------------------------------------------------------------------------------------------------------------------------------------------------------------------------------------------------------------------------------------------------------------------------------------------------------------------|-----------------------|
|                                   |                                         |                           |                                   |                                   |                                                     |                      | Quality of Evidence for Outcome     | Description of Findings                                                                                                                                                                                                                                                                                                                                            | Importance of Outcome |
| <b>ESRD</b>                       | 6 retrospective, 1 prospective cohorts  | Cohorts: 9198-1,021,049   | No limitations (0)                | No important inconsistencies (0)† | Direct (0)                                          | None                 | High (Moderate for HIV coinfection) | No HIV coinfection: All studies (6 of 6 analyses in 5 studies) found significantly higher rates of ESRD in HCV+ (vs. HCV-). ES range 1.47-7.2 (women)/4.6 (men).<br>HIV coinfection: Inconsistent: One study found no significant association between HCV coinfection and RRT (ES 0.84) One found significant association with CKD 5 (ES 1.95)                     | Critical              |
| <b>CKD</b>                        | 10 retrospective, 1 prospective cohorts | Cohorts: 538-1,021,049    | No limitations (0)                | Some inconsistencies (-1)         | Direct (0)                                          | None                 | Moderate                            | No HIV coinfection: Most studies(5 of 7) found significantly higher CKD incidence in HCV+ (vs. HCV-). ES range 0.86-1.83. One study found significantly <i>lower</i> risk of CKD in patients with <i>newly acquired</i> HCV.<br>HIV coinfection: All studies (3 of 3) found significantly higher CKD incidence in HCV+ coinfection (vs. HCV-). ES range 1.36-2.07. | High                  |
| <b>Decline in Kidney Function</b> | 3 retrospective cohorts                 | Cohorts: 63,023-1,021,049 | No limitations (0)                | Some inconsistencies (-1)         | Direct (0)                                          | None                 | Moderate                            | No HIV coinfection: 2 studies had conflicting findings with significant association between HCV+ and GFR loss >5 mL/min (OR 1.22) in 1 study, and no association with GFR loss ≥30 mL/min (HR 0.93) in 1 study.<br>HIV coinfection: 1 study significant association between HCV+ and GFR decline ≥25% to <60 mL/min (HR 1.31).                                     | High                  |
| <b>Total N</b>                    | 15 retrospective, 1 prospective cohorts | Cohorts: 538-1,021,049    |                                   |                                   |                                                     |                      |                                     |                                                                                                                                                                                                                                                                                                                                                                    |                       |

**Association of HCV+ status and CKD:**

People with HCV infection are at increased risk of CKD and ESRD compared to people without HCV infection. Among people with HIV, coinfection with HCV increases the risk for CKD, but it remains unclear whether it also increases the risk for ESRD.

**Quality of Overall Evidence:**

Moderate

**Studies included in EP:** 25529816, 23904290, 20400217, 21386707, 18371161, 23311442, 17592100, 26526451, 22554802, 26817874, 16524948, 19747988, 24257691, 25826420, 21185632, 22994610

**Abbreviations:** CKD: chronic kidney disease; DAA: direct-acting antivirals; GFR: glomerular filtration rate; RCT: randomized controlled trial; SVR: sustained virological response

**Annotations:**

\* Limited to largest studies with the addition of smaller studies of HIV population and from otherwise unrepresented countries.

† For general population. Two studies of HIV population were inconsistent with each other.



Table S5: Summary table

Treatment with direct-acting antiviral regimens in chronic HCV-infected CKD patients  
Categorical outcomes

| PMID            | Author                                                                                                                                                                                                                                                                                                   | Year | Type of article           | Study design                       | Sample size | CKD stage                                                                    | Kidney function   | Viral HCV RNA                                  | HCV genotype                                    | Outcome                                    | Definition                                                                   |
|-----------------|----------------------------------------------------------------------------------------------------------------------------------------------------------------------------------------------------------------------------------------------------------------------------------------------------------|------|---------------------------|------------------------------------|-------------|------------------------------------------------------------------------------|-------------------|------------------------------------------------|-------------------------------------------------|--------------------------------------------|------------------------------------------------------------------------------|
| 26456905        | Roth D., Nelson DR., Bruchfeld A., Liapakis A., Silva M., Monsour H., Martin P., Pol S., Londoño MC., Hassanein T., Zamor PJ., Zuckerman E., Wan S., Jackson B., Nguyen BY., Robertson M., Barr E., Wahl J., Greaves W.<br><a href="#">See Bruchfeld 2017 below for 2ndary analysis in placebo group</a> | 2015 | Peer-reviewed publication | RCT                                | 226         | CKD 4: 18.7%; CKD 5: 81.3% (CKD 5 nonD: 23.8%; CKD 5 D: 76.2%)               | nd                | ≤800,000 IU/mL: 42.6%<br>>800,000 IU/mL: 57.4% | 1a: 51.9%; 1b: 47.7%; 1: 0.4%                   | Serious AEs                                | any                                                                          |
|                 |                                                                                                                                                                                                                                                                                                          |      |                           |                                    |             |                                                                              |                   |                                                |                                                 | SVR12                                      | nd                                                                           |
|                 |                                                                                                                                                                                                                                                                                                          |      |                           |                                    |             |                                                                              |                   |                                                |                                                 | SVR4                                       | nd                                                                           |
|                 |                                                                                                                                                                                                                                                                                                          |      |                           |                                    |             |                                                                              |                   |                                                |                                                 | Relapse (viral)                            | nd                                                                           |
|                 |                                                                                                                                                                                                                                                                                                          |      |                           |                                    |             |                                                                              |                   |                                                |                                                 | Acute kidney injury                        | SCr >2.5x baseline value                                                     |
|                 |                                                                                                                                                                                                                                                                                                          |      |                           |                                    |             |                                                                              |                   |                                                |                                                 | Discontinuation due to AEs                 | nd                                                                           |
|                 |                                                                                                                                                                                                                                                                                                          |      |                           |                                    |             |                                                                              |                   |                                                |                                                 | Discontinuation                            | nd                                                                           |
|                 |                                                                                                                                                                                                                                                                                                          |      |                           |                                    |             |                                                                              |                   |                                                |                                                 | Death                                      | nd                                                                           |
| 26583882        | Nazario HE., Ndungu M., Modi AA.                                                                                                                                                                                                                                                                         | 2015 | Peer-reviewed publication | Single arm (cohort), prospective   | 17          | CKD Stage 5 nonD: 12%; GFR <30 mL/min with no dialysis: 12%<br>CKD 5 HD: 88% | HD: 88%           | >800,000 IU/mL: 76%                            | 1a: 76%                                         | SVR0                                       | undetectable hepatitis C viral load at the completion of 12 weeks of therapy |
|                 |                                                                                                                                                                                                                                                                                                          |      |                           |                                    |             |                                                                              |                   |                                                |                                                 | SVR12                                      | nd                                                                           |
| AASLD 2015 109  | Almarzooqi S; Klair JS; Karkada JG; Maan R; Cerocchi O; Kowgier M; Harrell SM; Rhodes K; Janssen HL; Feld JJ; Duarte-Rojo A                                                                                                                                                                              | 2015 | Abstract                  | nRCS, retrospective                | 456         | CKD 1-2                                                                      | CrCl: 0.83 (0.16) | nd                                             | 1: 78%; 2: 13%; 3; 7%                           | Liver cirrhosis                            | nd                                                                           |
|                 |                                                                                                                                                                                                                                                                                                          |      |                           |                                    |             |                                                                              |                   |                                                |                                                 | Acute kidney injury                        | SCr ↑≥50%                                                                    |
| AASLD 2015 115  | Dumortier J, Bailly F, Pageaux GP, Vallet-Pichard A, Radenne S, Habersetzer F, Gagnieu MC, Grange JD, Minello A, Kamar N, Alric L, Leroy V                                                                                                                                                               | 2015 | Abstract                  | Single arm (cohort), retrospective | 50          | CKD 3-5; CKD 5 HD: 70%; KTR: 34%; Transplant candidate: 54%                  | nd                | nd                                             | 1a: 14%; 1b: 42%; 2: 12%; 3: 10%; 4: 18%; 5: 4% | Serious AEs                                | Severe anemia                                                                |
|                 |                                                                                                                                                                                                                                                                                                          |      |                           |                                    |             |                                                                              |                   |                                                |                                                 | Discontinuation due to AEs                 | nd                                                                           |
|                 |                                                                                                                                                                                                                                                                                                          |      |                           |                                    |             |                                                                              |                   |                                                |                                                 | SVR12                                      | nd                                                                           |
|                 |                                                                                                                                                                                                                                                                                                          |      |                           |                                    |             |                                                                              |                   |                                                |                                                 | Relapse (viral)                            | nd                                                                           |
|                 |                                                                                                                                                                                                                                                                                                          |      |                           |                                    |             |                                                                              |                   |                                                |                                                 | Discontinuation                            | nd                                                                           |
| 26923436; ILC 2 | Saxena V; Korashy FM; Sise M; Lim JK; Chung RT; Liapakis A; Nelson DR; Schmidt M; Fried MW; Terrault N                                                                                                                                                                                                   | 2015 | Abstract                  | Single arm (cohort), retrospective | 1890        | CKD 3: 12.2%; CKD Stage 5: 86.8%                                             | nd                | nd                                             | 1: 71%; 2: 17%; 3: 9%                           | SVR12 in eGFR >60                          | nd                                                                           |
|                 |                                                                                                                                                                                                                                                                                                          |      |                           |                                    |             |                                                                              |                   |                                                |                                                 | SVR12 in eGFR ≤30                          | nd                                                                           |
|                 |                                                                                                                                                                                                                                                                                                          |      |                           |                                    |             |                                                                              |                   |                                                |                                                 | SVR12 in eGFR 31-45                        | nd                                                                           |
|                 |                                                                                                                                                                                                                                                                                                          |      |                           |                                    |             |                                                                              |                   |                                                |                                                 | SVR12 in eGFR 46-60                        | nd                                                                           |
|                 |                                                                                                                                                                                                                                                                                                          |      |                           |                                    |             |                                                                              |                   |                                                |                                                 | Death in eGFR >60                          | nd                                                                           |
|                 |                                                                                                                                                                                                                                                                                                          |      |                           |                                    |             |                                                                              |                   |                                                |                                                 | Death in eGFR ≤30                          | nd                                                                           |
|                 |                                                                                                                                                                                                                                                                                                          |      |                           |                                    |             |                                                                              |                   |                                                |                                                 | Death in eGFR 31-45                        | nd                                                                           |
|                 |                                                                                                                                                                                                                                                                                                          |      |                           |                                    |             |                                                                              |                   |                                                |                                                 | Death in eGFR 46-60                        | nd                                                                           |
|                 |                                                                                                                                                                                                                                                                                                          |      |                           |                                    |             |                                                                              |                   |                                                |                                                 | Discontinuation due to AEs in eGFR >60     | nd                                                                           |
|                 |                                                                                                                                                                                                                                                                                                          |      |                           |                                    |             |                                                                              |                   |                                                |                                                 | Discontinuation due to AEs in eGFR ≤30     | nd                                                                           |
|                 |                                                                                                                                                                                                                                                                                                          |      |                           |                                    |             |                                                                              |                   |                                                |                                                 | Discontinuation due to AEs in eGFR 31-45   | nd                                                                           |
|                 |                                                                                                                                                                                                                                                                                                          |      |                           |                                    |             |                                                                              |                   |                                                |                                                 | Discontinuation due to AEs in eGFR 46-60   | nd                                                                           |
|                 |                                                                                                                                                                                                                                                                                                          |      |                           |                                    |             |                                                                              |                   |                                                |                                                 | Discontinuation in eGFR >60                | nd                                                                           |
|                 |                                                                                                                                                                                                                                                                                                          |      |                           |                                    |             |                                                                              |                   |                                                |                                                 | Discontinuation in eGFR ≤30                | nd                                                                           |
|                 |                                                                                                                                                                                                                                                                                                          |      |                           |                                    |             |                                                                              |                   |                                                |                                                 | Discontinuation in eGFR 31-45              | nd                                                                           |
|                 |                                                                                                                                                                                                                                                                                                          |      |                           |                                    |             |                                                                              |                   |                                                |                                                 | Discontinuation in eGFR 46-60              | nd                                                                           |
|                 |                                                                                                                                                                                                                                                                                                          |      |                           |                                    |             |                                                                              |                   |                                                |                                                 | Kidney Function, categorical in eGFR >60   | Acute kidney injury                                                          |
|                 |                                                                                                                                                                                                                                                                                                          |      |                           |                                    |             |                                                                              |                   |                                                |                                                 | Kidney Function, categorical in eGFR ≤30   | nd                                                                           |
|                 |                                                                                                                                                                                                                                                                                                          |      |                           |                                    |             |                                                                              |                   |                                                |                                                 | Kidney Function, categorical in eGFR 31-45 | nd                                                                           |

| PMID           | Author                                                                                                                                                                                                                                                                                   | Year | Type of article           | Study design                        | Sample size        | CKD stage                                               | Kidney function                                                                                                                       | Viral HCV RNA                           | HCV genotype                   | Outcome                                                                                                                                                                                                                         | Definition                                            |
|----------------|------------------------------------------------------------------------------------------------------------------------------------------------------------------------------------------------------------------------------------------------------------------------------------------|------|---------------------------|-------------------------------------|--------------------|---------------------------------------------------------|---------------------------------------------------------------------------------------------------------------------------------------|-----------------------------------------|--------------------------------|---------------------------------------------------------------------------------------------------------------------------------------------------------------------------------------------------------------------------------|-------------------------------------------------------|
|                |                                                                                                                                                                                                                                                                                          |      |                           |                                     |                    |                                                         |                                                                                                                                       |                                         |                                | Kidney Function, categorical in eGFR 46-50<br>Kidney Function, categorical in eGFR >60<br>Kidney Function, categorical in eGFR <=30<br>Kidney Function, categorical in eGFR 31-45<br>Kidney Function, categorical in eGFR 46-60 | Renal or Urinary System                               |
| ILC 2015 P0802 | Nazario HE, Ndungu M, Modi A                                                                                                                                                                                                                                                             | 2015 | Abstract                  | Single arm (cohort), unclear        | 12                 | CKD 3-5: 8.3%; CKD 5 HD: 91.7%                          | nd                                                                                                                                    | nd                                      | 1a: 83%; 1b: 17%               | Discontinuation                                                                                                                                                                                                                 | nd                                                    |
|                |                                                                                                                                                                                                                                                                                          |      |                           |                                     |                    |                                                         |                                                                                                                                       |                                         |                                | Serious AEs<br>SVR12                                                                                                                                                                                                            | Anemia requiring blood<br>nd<br>nd                    |
| ILC 2015 P0878 | Czul F; Schiff E; Peyton A; Levy C; Hernandez M; Jeffers L; O'Brien C; Martin P; Bhamidimarri KR                                                                                                                                                                                         | 2015 | Abstract                  | Single arm (cohort), prospective    | 28                 | CKD 4-5 HD                                              | nd                                                                                                                                    | nd                                      | 1a: 56%; 1b: 36%; 2: 4%; 3: 4% | Serious AEs<br>SVR12                                                                                                                                                                                                            | Hepatic encephalopathy<br>Uncontrolled diarrhea<br>nd |
| 26976799       | Pockros PJ, Reddy KR, Mantry PS, Cohen E, Bennett M, Sulkowski MS, Bernstein DE, Cohen DE, Shulman NS, Wang D, Khatri A, Abunimeh M, Podsadecki T, Lawitz E.                                                                                                                             | 2016 | Peer-reviewed publication | Single arm (cohort), unclear        | 20                 | CKD 5 (all): 70%; CKD 4: 30%                            | GFR: median 10.9 mL/min/1.73m2 (range 5.4, 29.9); CrCl: median 18.1 mL/min (range 8.9, 63.1); SCr: median 6.2 mg/dL (range 2.2, 10.8) | median 6.6 (range 5.5, 7.6) log10 IU/mL | 1a: 65%; 1b: 35%               | Serious AEs<br>SVR12                                                                                                                                                                                                            | nd                                                    |
|                |                                                                                                                                                                                                                                                                                          |      |                           |                                     |                    |                                                         |                                                                                                                                       |                                         |                                | SVR4<br>Death<br>Discontinuation due to AEs<br>Relapse (viral)<br>Serious AEs                                                                                                                                                   | nd<br>nd<br>nd<br>nd<br>treatment-emergent AEs        |
| 26872889       | Toyoda H., Kumada T., Tada T., Takaguchi K., Ishikawa T., Tsuji K., Zeniya M., Iio E., Tanaka Y.                                                                                                                                                                                         | 2016 | Peer-reviewed publication | Single arm (cohort), prospective    | 28                 | CKD HD                                                  | GFR: 6.9 (2.4) mL/min/1.73m2; SCr: 7.16 (1.90) mg/dL                                                                                  | 5.89 (0.91) log10 IU/mL                 | 1b: 100%                       | Serious AEs<br>SVR 12                                                                                                                                                                                                           | nd                                                    |
|                |                                                                                                                                                                                                                                                                                          |      |                           |                                     |                    |                                                         |                                                                                                                                       |                                         |                                | SVR                                                                                                                                                                                                                             | nd                                                    |
|                |                                                                                                                                                                                                                                                                                          |      |                           |                                     |                    |                                                         |                                                                                                                                       |                                         |                                | Discontinuation due to AEs<br>Relapse (viral)                                                                                                                                                                                   | nd<br>nd                                              |
| 27098678       | Miyazaki R., Miyagi K.                                                                                                                                                                                                                                                                   | 2016 | Peer-reviewed publication | Case series/report                  | 10                 | CKD HD                                                  | nd                                                                                                                                    | 4.5 (0.97) log10 IU/mL                  | nd                             | SVR12                                                                                                                                                                                                                           | nd                                                    |
|                |                                                                                                                                                                                                                                                                                          |      |                           |                                     |                    |                                                         |                                                                                                                                       |                                         |                                | Discontinuation due to AEs                                                                                                                                                                                                      | nd                                                    |
| 26768604       | Suda G., Kudo M., Nagasaka A., Furuya K., Yamamoto Y., Kobayashi T., Shinada K., Tateyama M., Konno J., Tsukuda Y., Yamasaki K., Kimura M., Umemura M., Izumi T., Tsunematsu S., Sato F., Terashita K., Nakai M., Horimoto H., Sho T., Natsuizaka M., Morikawa K., Ogawa K., Sakamoto N. | 2016 | Peer-reviewed publication | Single arm (cohort), prospective    | 34                 | CKD HD                                                  | nd                                                                                                                                    | median 5.7 (range 2.9, 6.8) log10 IU/mL | 1a: 4.8%; 1b: 90.5%            | SVR 12                                                                                                                                                                                                                          | nd                                                    |
|                |                                                                                                                                                                                                                                                                                          |      |                           |                                     |                    |                                                         |                                                                                                                                       |                                         |                                | Relapse (viral)<br>Hepatocellular carcinoma (HCC)<br>Serious AEs                                                                                                                                                                | nd<br>nd<br>nd                                        |
| 27771774       | Morisawa, N. and Koshima, Y. and Satoh, J. I. and Maruyama, Y. and Kuriyama, S. and Yokoo, T. and Amemiya, M.                                                                                                                                                                            | 2016 | Peer-reviewed publication | Single arm (cohort), retrospective  | 29                 | CKD 3-5D                                                | eGFR: 45.8 (15.9) SCr: 1.82 (2.69)                                                                                                    | 6.0 (3.7, 6.7) log10IU/mL               | 1b: 100%                       | SVR12                                                                                                                                                                                                                           | nd                                                    |
|                |                                                                                                                                                                                                                                                                                          |      |                           |                                     |                    |                                                         |                                                                                                                                       |                                         |                                | SVR24<br>Discontinuation                                                                                                                                                                                                        | nd<br>overall discontinuations                        |
| 27602542       | Nakamura, Y. and Imamura, M. and Kawakami, Y. and Teraoka, Y. and Dajjo, K. and Honda, F. and Morio, K. and Kobayashi, T. and Nakahara, T. and Nagaoki, Y. and Kawaoka, T. and Tsuge, M. and Hiramatsu, A. and Aikata, H. and Hayes, C. N. and Miki, D. and Ochi, H. and Chayama, K.     | 2017 | Peer-reviewed publication | Single arm (cohort), prospective    | 147                | CKD 1-5D                                                | eGFR: 69 (17, 128) mL/min/1/73m2 GFR >=50: 85.7% GFR <50: 14.3% SCr: 0.70 (0.39, 2.33)                                                | nd                                      | nd                             | SVR                                                                                                                                                                                                                             | timepoint unclear                                     |
|                |                                                                                                                                                                                                                                                                                          |      |                           |                                     |                    |                                                         |                                                                                                                                       |                                         |                                | Discontinuations due to AEs                                                                                                                                                                                                     | timepoint unclear<br>nd                               |
| ASN TH-PO1143  | Sise M.E., G.L. Hundemer, G. Ortiz, E. Backman, D.Chute, J.Brancale, R.I. Thadhani, R.T. Chung.                                                                                                                                                                                          | 2016 | Abstract                  | Single arm (cohort), prospective    | 107                | CKD 3-5D                                                | SCr: 1.26 (0.37) mg/dL                                                                                                                | nd                                      | nd                             | SVR                                                                                                                                                                                                                             | nd                                                    |
| AASLD 909      | Bernstein DE, et al                                                                                                                                                                                                                                                                      | 2016 | Abstract                  | Multiple pooled prospective studies | 82<br>1479<br>1172 | eGFR <60 ml/min<br>eGFR 60-90 ml/min<br>eGFR >90 ml/min | nd<br>nd<br>nd                                                                                                                        | nd<br>nd<br>nd                          | 1: 100%<br>1: 100%<br>1: 100%  | Factors associated with >10ml/min increase in eGFR                                                                                                                                                                              | Multivariate analysis                                 |
| AASLD 950      | Miyase S, et al                                                                                                                                                                                                                                                                          | 2016 | Abstract                  | Single arm (cohort), prospective    | 16                 | CKD HD                                                  | nd                                                                                                                                    | nd                                      | 1b: 100%                       | SVR 12<br>Discontinue due to AEs                                                                                                                                                                                                | nd                                                    |
| AASLD 1967     | Suda G, et al                                                                                                                                                                                                                                                                            | 2016 | Abstract                  | Single arm (cohort), prospective    | 29                 | CKD HD                                                  | nd                                                                                                                                    | nd                                      | nd                             | SVR 12<br>Discontinue due to AEs                                                                                                                                                                                                | nd                                                    |

| PMID       | Author                                                                                                                                                                                                                                                                                                                                                                                                                           | Year | Type of article           | Study design                       | Sample size | CKD stage              | Kidney function                                | Viral HCV RNA              | HCV genotype                                   | Outcome                                        | Definition                                                                                                                                                                                                                                                                                                          |
|------------|----------------------------------------------------------------------------------------------------------------------------------------------------------------------------------------------------------------------------------------------------------------------------------------------------------------------------------------------------------------------------------------------------------------------------------|------|---------------------------|------------------------------------|-------------|------------------------|------------------------------------------------|----------------------------|------------------------------------------------|------------------------------------------------|---------------------------------------------------------------------------------------------------------------------------------------------------------------------------------------------------------------------------------------------------------------------------------------------------------------------|
| AASLD 1982 | Panziani FR et al                                                                                                                                                                                                                                                                                                                                                                                                                | 2016 | Abstract                  | Single arm (cohort), prospective   | 10          | CKD HD                 | nd                                             | 513,330 IU/mL              | 1a:10%, 1b:80%, 4:10%                          | SVR 12                                         | nd                                                                                                                                                                                                                                                                                                                  |
| 27943523   | Goki S., Atsushi Nagasaka, Yoshiya Yamamoto, Ken Furuya, Kenichi Kumagai, Mineo Kudo, Katsumi Terashita, Tomoe Kobayashi, Izumi Tsunematsu, Junichi Yoshida,10 Takashi Meguro,11 Megumi Kimura,1 Jun Ito,1 Machiko Umemura,1, Takaaki Izumi,1 Seiji Tsunematsu,1 Fumiyuki Sato,1 Yoko Tsukuda,1,2 Masato Nakai,1, Takuya Sho,1 Mitsuteru Natsuizaka,1 Kenichi Morikawa,1 Koji Ogawa,1 Naoya Sakamoto1, for the NORTE Study Group | 2017 | Peer-reviewed publication | Single arm (cohort), prospective   | 322         | CKD 1-5D               | eGFR 70 (10, 121) mL/min/1.73 m2               | 6.1 (2.6, 7.8) log10 IU/mL | 1: 100%                                        | SVR12                                          | overall SVR                                                                                                                                                                                                                                                                                                         |
|            |                                                                                                                                                                                                                                                                                                                                                                                                                                  |      |                           |                                    |             |                        |                                                |                            |                                                | SVR24                                          | overall SVR in patients with overall end of treatment (ETR) overall ETR in patients with CKD did not complete 24 weeks of |
| 29020583   | Gane E, et al                                                                                                                                                                                                                                                                                                                                                                                                                    | 2017 | Peer-reviewed publication | Single arm (cohort), prospective   | 104         | CKD 4: 13%, CKD 5: 87% | nd                                             | 5.9 (3.4-7.5) log10        | 1: 52% (1a: 22%, 1b: 28%, non1a/1b: 2%)        | SVR12<br>SVR24                                 | Discontinuations due to AEs                                                                                                                                                                                                                                                                                         |
| 29270489   | Agarwal SK, et al                                                                                                                                                                                                                                                                                                                                                                                                                | 2017 | Peer-reviewed publication | Single arm (cohort), prospective   | 62          | CKD HD                 | nd                                             | nd                         | 1: 64.5%, 2: 1.6%, 3: 29%, 4: 3.2%, 6: 1.6%    | SVR12                                          | Discontinuations due to AEs                                                                                                                                                                                                                                                                                         |
| 28882857   | Sise ME, et al                                                                                                                                                                                                                                                                                                                                                                                                                   | 2017 | Peer-reviewed publication | Single arm (cohort), retrospective | 98          | CKD 1-3                | SCr 1.3 (0.3) mg/dL<br><br>eGFR 60 (20) ml/min | 4.4 (5.8) log10 IU/ml      | 1: 73% (1a: 55%, 1b: 18%), 2:14%, 3: 7%, 4: 5% | SVR12                                          | Discontinuation due to AEs<br>Serious adverse events                                                                                                                                                                                                                                                                |
| 28576451   | Bruchfeld A, et al<br><i>This study includes the placebo group from Roth 2015 26456905 who received deferred treatment after the trial was completed.</i>                                                                                                                                                                                                                                                                        | 2017 | Peer-reviewed publication | RCT                                | 113         | CKD 4: 19%, CKD 5: 81% | nd                                             | ≤800,000 IU/mL: 42%        | 1a: 52%; 1b: 47%; 1other: 1%                   | SVR12<br>Serious adverse events                | nd                                                                                                                                                                                                                                                                                                                  |
|            |                                                                                                                                                                                                                                                                                                                                                                                                                                  |      |                           |                                    |             |                        |                                                |                            |                                                | Discontinuation due to AEs<br>Patient survival |                                                                                                                                                                                                                                                                                                                     |



| PMID            | Author                                                                                                                                                                                                                                                                                   | Year | Arm                                                                                            | Dose                                                      | Duration | Timepoint              | Frequency/Rate  | Relative effect                                                                                                                                                                | p-value                            | Quality |
|-----------------|------------------------------------------------------------------------------------------------------------------------------------------------------------------------------------------------------------------------------------------------------------------------------------------|------|------------------------------------------------------------------------------------------------|-----------------------------------------------------------|----------|------------------------|-----------------|--------------------------------------------------------------------------------------------------------------------------------------------------------------------------------|------------------------------------|---------|
|                 |                                                                                                                                                                                                                                                                                          |      |                                                                                                |                                                           |          |                        | 3/168 (2%)      | nd                                                                                                                                                                             | nd                                 |         |
|                 |                                                                                                                                                                                                                                                                                          |      |                                                                                                |                                                           |          | nd                     | 82/1641 (5%)    | nd                                                                                                                                                                             | nd                                 |         |
|                 |                                                                                                                                                                                                                                                                                          |      |                                                                                                |                                                           |          |                        | 5/18 (25%)      | nd                                                                                                                                                                             | nd                                 |         |
|                 |                                                                                                                                                                                                                                                                                          |      |                                                                                                |                                                           |          |                        | 8/63 (13%)      | nd                                                                                                                                                                             | nd                                 |         |
|                 |                                                                                                                                                                                                                                                                                          |      |                                                                                                |                                                           |          |                        | 13/168 (8%)     | nd                                                                                                                                                                             | nd                                 |         |
| ILC 2015 P0802  | Nazario HE, Ndungu M, Modi A                                                                                                                                                                                                                                                             | 2015 | sofosbuvir + simeprevir                                                                        | 400 mg OD + 150 mg OD                                     | 12 weeks | nd                     | 0/12 (0%)       | nd                                                                                                                                                                             | nd                                 | Poor    |
|                 |                                                                                                                                                                                                                                                                                          |      |                                                                                                |                                                           |          | nd                     | 1/12            | nd                                                                                                                                                                             | nd                                 |         |
|                 |                                                                                                                                                                                                                                                                                          |      |                                                                                                |                                                           |          | 12 weeks               | 5/5 (100%)      | nd                                                                                                                                                                             | nd                                 |         |
| ILC 2015 P0878, | Czul F; Schiff E; Peyton A; Levy C; Hernandez M; Jeffers L; O'Brien C; Martin P; Bhamidimarri KR                                                                                                                                                                                         | 2015 | sofosbuvir + simeprevir                                                                        | 150 mg OD + 200 mg OD                                     | 12 weeks | 12 weeks               | 19/21 (90%)     | nd                                                                                                                                                                             | nd                                 | Good    |
|                 |                                                                                                                                                                                                                                                                                          |      |                                                                                                |                                                           |          | 12 weeks               | 1/21 (5%)       | nd                                                                                                                                                                             | nd                                 |         |
|                 |                                                                                                                                                                                                                                                                                          |      |                                                                                                |                                                           |          | 12 weeks               | 1/21 (5%)       | nd                                                                                                                                                                             | nd                                 |         |
| 26976799        | Pockros PJ., Reddy KR., Mantry PS., Cohen E., Bennett M., Sulkowski MS., Bernstein DE., Cohen DE., Shulman NS., Wang D., Khatry A., Abunimeh M., Podsadecki T., Lawitz E.                                                                                                                | 2016 | ombitasvir + paritaprevir + ritonavir + dasabuvir ± ribavirin                                  | 25 mg OD + 150 mg OD + 100 mg OD + 250 mg BID + 200 mg OD | 12 weeks | 12 weeks               | 18/20 (90%)     | nd                                                                                                                                                                             | nd                                 | Fair    |
|                 |                                                                                                                                                                                                                                                                                          |      |                                                                                                |                                                           |          | 4 weeks                | 18/20 (90%)     | nd                                                                                                                                                                             | nd                                 |         |
|                 |                                                                                                                                                                                                                                                                                          |      |                                                                                                |                                                           |          | 12 weeks               | 1/20 (5%)       | nd                                                                                                                                                                             | nd                                 |         |
|                 |                                                                                                                                                                                                                                                                                          |      |                                                                                                |                                                           |          | 12 weeks               | 0/20 (0%)       | nd                                                                                                                                                                             | nd                                 |         |
|                 |                                                                                                                                                                                                                                                                                          |      |                                                                                                |                                                           |          | 12 weeks               | 1/20 (5%)       | nd                                                                                                                                                                             | nd                                 |         |
|                 |                                                                                                                                                                                                                                                                                          |      |                                                                                                |                                                           |          | 30 days                | 4/20 (20%)      | nd                                                                                                                                                                             | nd                                 |         |
| 26872889        | Toyoda H., Kumada T., Tada T., Takaguchi K., Ishikawa T., Tsuji K., Zeniya M., Iio E., Tanaka Y.                                                                                                                                                                                         | 2016 | daclatasvir + asunaprevir                                                                      | 60 mg OD + 100 mg BID                                     | 24 weeks | 12 weeks               | 28/28 (100%)    | nd                                                                                                                                                                             | nd                                 | Fair    |
|                 |                                                                                                                                                                                                                                                                                          |      |                                                                                                |                                                           |          | 2 weeks                | 14/28 (50%)     | nd                                                                                                                                                                             | nd                                 |         |
|                 |                                                                                                                                                                                                                                                                                          |      |                                                                                                |                                                           |          | 4 weeks                | 25/28 (89.3%)   | nd                                                                                                                                                                             | nd                                 |         |
|                 |                                                                                                                                                                                                                                                                                          |      |                                                                                                |                                                           |          | 8 weeks                | 28/28 (100%)    | nd                                                                                                                                                                             | nd                                 |         |
|                 |                                                                                                                                                                                                                                                                                          |      |                                                                                                |                                                           |          | 0 weeks post-treatment | 1/28 (3.6%)     | nd                                                                                                                                                                             | nd                                 |         |
|                 |                                                                                                                                                                                                                                                                                          |      |                                                                                                |                                                           |          | 12 weeks               | 0/28 (0%)       | nd                                                                                                                                                                             | nd                                 |         |
| 27098678        | Miyazaki R., Miyagi K.                                                                                                                                                                                                                                                                   | 2016 | daclatasvir + asunaprevir                                                                      | 60 mg OD + 100 mg BID                                     | 24 weeks | 12 weeks               | 10/10 (100%)    | nd                                                                                                                                                                             | nd                                 | Poor    |
|                 |                                                                                                                                                                                                                                                                                          |      |                                                                                                |                                                           |          | 12 weeks               | 0/10 (0%)       | nd                                                                                                                                                                             | nd                                 |         |
| 26768604        | Suda G., Kudo M., Nagasaka A., Furuya K., Yamamoto Y., Kobayashi T., Shinada K., Tateyama M., Konno J., Tsukuda Y., Yamasaki K., Kimura M., Umemura M., Izumi T., Tsunematsu S., Sato F., Terashita K., Nakai M., Horimoto H., Sho T., Natsuizaka M., Morikawa K., Ogawa K., Sakamoto N. | 2016 | daclatasvir + asunaprevir                                                                      | 100 mg PO BID + 60 mg PO BID                              | 24 weeks | 12 weeks               | 20/21 (95%)     | nd                                                                                                                                                                             | nd                                 | Poor    |
|                 |                                                                                                                                                                                                                                                                                          |      |                                                                                                |                                                           |          | 12 weeks               | 1/21 (5%)       | nd                                                                                                                                                                             | nd                                 |         |
|                 |                                                                                                                                                                                                                                                                                          |      |                                                                                                |                                                           |          | 24 weeks               | 1/21 (5%)       | nd                                                                                                                                                                             | nd                                 |         |
|                 |                                                                                                                                                                                                                                                                                          |      |                                                                                                |                                                           |          | 24 weeks               | 1/21 (5%)       | nd                                                                                                                                                                             | nd                                 |         |
| 27771774        | Morisawa, N. and Koshima, Y. and Satoh, J. I. and Maruyama, Y. and Kuriyama, S. and Yokoo, T. and Amemiya, M.                                                                                                                                                                            | 2016 | daclatasvir + asunaprevir                                                                      | nd                                                        | nd       | 12 weeks               | 27/29 (93.1%)   | nd                                                                                                                                                                             | nd                                 | Fair    |
|                 |                                                                                                                                                                                                                                                                                          |      |                                                                                                |                                                           |          | 24 weeks               | 27/29 (93.1%)   | nd                                                                                                                                                                             | nd                                 |         |
|                 |                                                                                                                                                                                                                                                                                          |      |                                                                                                |                                                           |          | 48 weeks               | 3/29 (10.3%)    | nd                                                                                                                                                                             | nd                                 |         |
| 27602542        | Nakamura, Y. and Imamura, M. and Kawakami, Y. and Teraoka, Y. and Daijo, K. and Honda, F. and Morio, K. and Kobayashi, T. and Nakahara, T. and Nagaoki, Y. and Kawaoka, T. and Tsuge, M. and Hiramatsu, A. and Aikata, H. and Hayes, C. N. and Miki, D. and Ochi, H. and Chayama, K.     | 2017 | daclatasvir + asunaprevir (GFR >=50)                                                           | 60 mg OD + 200 mg BID                                     | 24 weeks | nd                     | 119*126 (94.4%) | nd                                                                                                                                                                             | nd                                 | Fair    |
|                 |                                                                                                                                                                                                                                                                                          |      | daclatasvir + asunaprevir (GFR <50)                                                            | 60 mg OD + 200 mg BID                                     | 24 weeks | 24 weeks               | 20/21 (95.2%)   | nd                                                                                                                                                                             | nd                                 |         |
|                 |                                                                                                                                                                                                                                                                                          |      | daclatasvir + asunaprevir                                                                      | 60 mg OD + 200 mg BID                                     | 24 weeks | 24 weeks               | 2/147 (1.3%)    | nd                                                                                                                                                                             | nd                                 |         |
| ASN TH-PO1143   | Sise M.E., G.L. Hundemer, G. Ortiz, E. Backman, D.Chute, J.Brancale, R.I. Thadhani, R.T. Chung.                                                                                                                                                                                          | 2016 | sofosbuvir + simeprevir (42%)<br>sofosbuvir + ledipasvir (24%)<br>sofosbuvir + ribavirin (34%) | nd                                                        | nd       | 12 weeks               | 81%             | nd                                                                                                                                                                             | nd                                 | Poor    |
| AASLD 909       | Bernstein DE, et al                                                                                                                                                                                                                                                                      | 2016 | ombitasvir + paritaprevir + ritonavir + dasabuvir ± ribavirin                                  | 25 mg OD + 150 mg OD + 100 mg                             | nd       | nd                     |                 | Baseline proteinuria OR 1.647 (1.320-2.054)<br>Baseline diabetes OR 1.512 (1.059-2.161)<br>Baseline BMI OR 0.948 (0.926-0.971)<br>African American race OR 0.596 (0.384-0.923) | <0.001<br>0.023<br><0.001<br>0.021 | Poor    |
| AASLD 950       | Miyase S, et al                                                                                                                                                                                                                                                                          | 2016 | daclatasvir + asunaprevir                                                                      | nd                                                        | nd       | 12 weeks               | 100%            | nd                                                                                                                                                                             | nd                                 | Poor    |
|                 |                                                                                                                                                                                                                                                                                          |      |                                                                                                |                                                           |          |                        | 6%              | nd                                                                                                                                                                             | nd                                 |         |
| AASLD 1967      | Suda G, et al                                                                                                                                                                                                                                                                            | 2016 | daclatasvir + asunaprevir                                                                      | nd                                                        | nd       | 12 weeks               | 97%             | nd                                                                                                                                                                             | nd                                 | Poor    |
|                 |                                                                                                                                                                                                                                                                                          |      |                                                                                                |                                                           |          |                        | 7%              | nd                                                                                                                                                                             | nd                                 |         |

| PMID       | Author                                                                                                                                                                                                                                                                                                                                                                                                                           | Year | Arm                                                           | Dose                                                      | Duration | Timepoint        | Frequency/Rate  | Relative effect | p-value | Quality |
|------------|----------------------------------------------------------------------------------------------------------------------------------------------------------------------------------------------------------------------------------------------------------------------------------------------------------------------------------------------------------------------------------------------------------------------------------|------|---------------------------------------------------------------|-----------------------------------------------------------|----------|------------------|-----------------|-----------------|---------|---------|
| AASLD 1982 | Panziani FR et al                                                                                                                                                                                                                                                                                                                                                                                                                | 2016 | ombitasvir + paritaprevir + ritonavir + dasabuvir ± ribavirin | 25 mg OD + 150 mg OD + 100 mg OD + 250 mg BID + 200 mg OD | nd       | 12-24 weeks      | 100%            | nd              | nd      | Poor    |
| 27943523   | Goki S., Atsushi Nagasaka, Yoshiya Yamamoto, Ken Furuya, Kenichi Kumagai, Mineo Kudo, Katsumi Terashita, Tomoe Kobayashi, Izumi Tsunematsu, Junichi Yoshida,10 Takashi Meguro,11 Megumi Kimura,1 Jun Ito,1 Machiko Umemura,1, Takaaki Izumi,1 Seiji Tsunematsu,1 Fumiyuki Sato,1 Yoko Tsukuda,1,2 Masato Nakai,1, Takuya Sho,1 Mitsuteru Natsuizaka,1 Kenichi Morikawa,1 Koji Ogawa,1 Naoya Sakamoto1, for the NORTE Study Group | 2017 | asunaprevir + daclatasvir                                     | 100 mg PO BID + 60 mg PO BID                              | 24 weeks | 12 weeks         | 289/322 (89.9%) | nd              | nd      | Good    |
|            |                                                                                                                                                                                                                                                                                                                                                                                                                                  |      | asunaprevir + daclatasvir                                     | 101 mg PO BID + 60 mg PO BID                              | 24 weeks | 12 weeks         | 8/8 (100%)      | nd              | nd      |         |
|            |                                                                                                                                                                                                                                                                                                                                                                                                                                  |      | asunaprevir + daclatasvir                                     | 102 mg PO BID + 60 mg PO BID                              | 24 weeks | 12 weeks         | 16/16 (100%)    | nd              | nd      |         |
|            |                                                                                                                                                                                                                                                                                                                                                                                                                                  |      | asunaprevir + daclatasvir                                     | 103 mg PO BID + 60 mg PO BID                              | 24 weeks | 12 weeks         | 63/71 (88.7%)   | nd              | nd      |         |
|            |                                                                                                                                                                                                                                                                                                                                                                                                                                  |      | asunaprevir + daclatasvir                                     | 104 mg PO BID + 60 mg PO BID                              | 24 weeks | 12 weeks         | 137/159 (86.2%) | nd              | nd      |         |
|            |                                                                                                                                                                                                                                                                                                                                                                                                                                  |      | asunaprevir + daclatasvir                                     | 104 mg PO BID + 60 mg PO BID                              | 24 weeks | 12 weeks         | 65/68 (95.6%)   | nd              | nd      |         |
|            |                                                                                                                                                                                                                                                                                                                                                                                                                                  |      | asunaprevir + daclatasvir                                     | 100 mg PO BID + 60 mg PO BID                              | 24 weeks | 24 weeks         | 95%             | nd              | nd      |         |
|            |                                                                                                                                                                                                                                                                                                                                                                                                                                  |      | asunaprevir + daclatasvir                                     | 101 mg PO BID + 60 mg PO BID                              | 24 weeks | 24 weeks         | 100%            | nd              | nd      |         |
|            |                                                                                                                                                                                                                                                                                                                                                                                                                                  |      | asunaprevir + daclatasvir                                     | 102 mg PO BID + 60 mg PO BID                              | 24 weeks | 24 weeks         | 100%            | nd              | nd      |         |
|            |                                                                                                                                                                                                                                                                                                                                                                                                                                  |      | asunaprevir + daclatasvir                                     | 103 mg PO BID + 60 mg PO BID                              | 24 weeks | 24 weeks         | 95.80%          | nd              | nd      |         |
|            |                                                                                                                                                                                                                                                                                                                                                                                                                                  |      | asunaprevir + daclatasvir                                     | 104 mg PO BID + 60 mg PO BID                              | 24 weeks | 24 weeks         | 93.70%          | nd              | nd      |         |
|            |                                                                                                                                                                                                                                                                                                                                                                                                                                  |      | asunaprevir + daclatasvir                                     | 104 mg PO BID + 60 mg PO BID                              | 24 weeks | 24 weeks         | 95.60%          | nd              | nd      |         |
|            |                                                                                                                                                                                                                                                                                                                                                                                                                                  |      | asunaprevir + daclatasvir                                     | 101 mg PO BID + 60 mg PO BID                              | 25 weeks | 24 weeks         | 27/322 (8.4%)   | nd              | nd      |         |
| 29020583   | Gane E, et al                                                                                                                                                                                                                                                                                                                                                                                                                    | 2017 | glecaprevir + pibrentasvir                                    |                                                           |          |                  | 102/104 (98%)   | nd              | nd      | Good    |
|            |                                                                                                                                                                                                                                                                                                                                                                                                                                  |      | glecaprevir + pibrentasvir                                    |                                                           |          |                  | 100/104 (96%)   | nd              | nd      |         |
|            |                                                                                                                                                                                                                                                                                                                                                                                                                                  |      | glecaprevir + pibrentasvir                                    |                                                           |          |                  | 25/104 (24%)    | nd              | nd      |         |
|            |                                                                                                                                                                                                                                                                                                                                                                                                                                  |      | glecaprevir + pibrentasvir                                    |                                                           |          |                  | 5/104 (5%)      | nd              | nd      |         |
| 29270489   | Agarwal SK, et al                                                                                                                                                                                                                                                                                                                                                                                                                | 2017 | Sofosbuvir + ribavirin                                        |                                                           |          |                  | 39/41 (95%)     | nd              | nd      | Fair    |
|            |                                                                                                                                                                                                                                                                                                                                                                                                                                  |      | Sofosbuvir + daclatasvir                                      |                                                           |          |                  | 20/21 (95%)     | nd              | nd      |         |
| 28882857   | Sise ME, et al                                                                                                                                                                                                                                                                                                                                                                                                                   | 2017 | Sofosbuvir-based treatment                                    |                                                           |          |                  | 79/98 (81%)     | nd              | nd      | Fair    |
|            |                                                                                                                                                                                                                                                                                                                                                                                                                                  |      | Sofosbuvir-based treatment                                    |                                                           |          |                  | 8/98 (8%)       | nd              | nd      |         |
|            |                                                                                                                                                                                                                                                                                                                                                                                                                                  |      | Sofosbuvir-based treatment                                    |                                                           |          |                  | 17/98 (17%)     | nd              | nd      |         |
| 28576451   | Bruchfeld A, et al<br>This study includes the placebo group from Roth 2015 26456905 who received deferred treatment after the trial was completed.                                                                                                                                                                                                                                                                               | 2017 | grazoprevir + elbasvir (deferred treatment)                   | 100 mg OD + 50 mg OD                                      | 12 weeks | 12 weeks post-Tx | 97/102 (95.1%)  | nd              | nd      | Good    |
|            |                                                                                                                                                                                                                                                                                                                                                                                                                                  |      | grazoprevir + elbasvir (deferred treatment)                   | 100 mg OD + 50 mg OD                                      | 12 weeks | 12 weeks post-Tx | 19/113 (16.8%)  | nd              | nd      |         |
|            |                                                                                                                                                                                                                                                                                                                                                                                                                                  |      | grazoprevir + elbasvir (deferred treatment)                   | 100 mg OD + 50 mg OD                                      | 12 weeks | 12 weeks post-Tx | 5/113 (4.4%)    | nd              | nd      |         |
|            |                                                                                                                                                                                                                                                                                                                                                                                                                                  |      | grazoprevir + elbasvir (deferred treatment)                   | 100 mg OD + 50 mg OD                                      | 12 weeks | 12 weeks post-Tx | 110/113 (97.3%) | nd              | nd      |         |

Table S5: Summary table  
Treatment with direct-acting antiviral regimens in chronic HCV-  
infected CKD patients  
Continuous outcomes

| PMID            | Author                                                                                                                                     | Year | Type of article           | Study design                       | Sample size | CKD stage                                                   | Kidney function                                    | Viral HCV RNA                      | HCV genotype                                    | Outcome      | Definition                                                         |
|-----------------|--------------------------------------------------------------------------------------------------------------------------------------------|------|---------------------------|------------------------------------|-------------|-------------------------------------------------------------|----------------------------------------------------|------------------------------------|-------------------------------------------------|--------------|--------------------------------------------------------------------|
| AASLD 2015 1158 | Dumortier J, Bailly F, Pageaux GP, Vallet-Pichard A, Radenne S, Habersetzer F, Gagnieu MC, Grange JD, Minello A, Kamar N, Alric L, Leroy V | 2015 | Abstract                  | Single arm (cohort), retrospective | 50          | CKD 3-5; CKD 5 HD: 70%; KTR: 34%; Transplant candidate: 54% | nd                                                 | nd                                 | 1a: 14%; 1b: 42%; 2: 12%; 3: 10%; 4: 18%; 5: 4% | GFR          | GFR in nonHD patients, ml/min                                      |
| ASN TH-PO1143   | M.E. Sise, G.L. Hundemer, G. Ortiz, E. Backman, D.Chute, J.Brancale, R.I. Thadhani, R.T. Chung.                                            | 2016 | Abstract                  | Single arm (cohort), prospective   | 107         | CKD 3-5D                                                    | SCr: 1.26 (0.37) mg/dL                             | nd                                 | nd                                              | SCr          | average creatinine 12 weeks after therapy                          |
| ASN PUB204      | J. Pagan, A.A. Armstrong, V. Blumer, R.J. Echeverri, M. Del Pilar Hernandez, F.E. Pedraza, M.A. LadinoAvellaneda, D. Roth                  | 2016 | Abstract                  | Single arm (cohort), retrospective | 397         | nd                                                          | SCr: 1.4 mg/dL eGFR: 53 mL/min                     | nd                                 | nd                                              | SCr<br>GFR   | SCr after DAA therapy<br>eGFR after DAA therapy                    |
| AASLD 889       | Reddy KR et. al.                                                                                                                           | 2016 | Abstract                  | Single arm (cohort), prospective   | 32<br>1657  | eGFR 30-60 ml/min<br>eGFR >60 ml/min                        | eGFR 56 (45-59) ml/min<br>eGFR 100 (61-364) ml/min | 3,344,605 IU/mL<br>4,030,364 IU/mL | nd                                              | eGFR<br>eGFR | eGFR 12 weeks after DAA therapy<br>eGFR 12 weeks after DAA therapy |
| 29020583        | Gane E, et al                                                                                                                              | 2017 | Peer-reviewed publication | Single arm (cohort), prospective   | 104         | CKD 4-5 (18%)                                               | eGFR                                               | nd                                 | nd                                              | eGFR         | eGFR 12 weeks after DAA therapy                                    |
| 28882857        | Sise ME, et al                                                                                                                             | 2017 | Peer-reviewed publication | Single arm (cohort), retrospective | 98          | CKD 1-3                                                     | SCr: 1.3 (0.3) mg/dL eGFR: 60 (20) mL/min          | 4.4 (5.8) log10 IU/ml              | 1: 73% (1a: 55%, 1b: 18%), 2:14%, 3: 7%, 4: 5%  | eGFR         | eGFR 6 months after DAA therapy                                    |

Table S5: Summary table  
 Treatment with direct-acting antiviral regimens in chronic HCV-  
 infected CKD patients  
 Continuous outcomes

| PMID            | Author                                                                                                                                     | Year | Arm                                                                                                                                                                                                  | Dose                 | Duration                 | N          | Baseline Value                                     | Timepoint            | Value                                              | Change     | p-value        | Quality |
|-----------------|--------------------------------------------------------------------------------------------------------------------------------------------|------|------------------------------------------------------------------------------------------------------------------------------------------------------------------------------------------------------|----------------------|--------------------------|------------|----------------------------------------------------|----------------------|----------------------------------------------------|------------|----------------|---------|
| AASLD 2015 1158 | Dumortier J, Bailly F, Pageaux GP, Vallet-Pichard A, Radenne S, Habersetzer F, Gagnieu MC, Grange JD, Minello A, Kamar N, Alric L, Leroy V | 2015 | sofosbuvir-based therapy                                                                                                                                                                             | nd                   | 12-24 weeks              | 12         | 29.6 (6.2)                                         | 24 weeks             | 27.9 (6.5)                                         | -1.7       | NS             | Poor    |
| ASN TH-PO1143   | M.E. Sise, G.L. Hundemer, G. Ortiz, E. Backman, D.Chute, J.Brancale, R.I. Thadhani, R.T. Chung.                                            | 2016 | sofosbuvir + simeprevir (42%)<br>sofosbuvir + ledipasvir (24%)<br>sofosbuvir + ribavirin (34%)                                                                                                       | nd                   | nd                       | 107        | 1.26 (0.37)                                        | 12 weeks             | 1.24 (0.8)                                         | -0.02      | nd             | Poor    |
| ASN PUB204      | J. Pagan, A.A. Armstrong, V. Blumer, R.J. Echeverri, M. Del Pilar Hernandez, F.E. Pedraza, M.A. LadinoAvellaneda, D. Roth                  | 2016 | sofosbuvir (390/396:98.5%), ribavirin (201/396:50.8%), ledipasvir (195/396:49.2%), simeprevir (155/396:39.1%)<br>or daclastavir (8/396:2%)<br>sofosbuvir (390/396:98.5%), ribavirin (201/396:50.8%), | nd<br>nd             | nd<br>nd                 | 397<br>397 | 1.4<br>53                                          | 12 weeks<br>12 weeks | 1.2<br>64                                          | -0.2<br>11 | 0.001<br>0.001 | Poor    |
| AASLD 889       | Reddy KR et. al.                                                                                                                           | 2016 | elbasvir/grazoprevir (39% with ribavirin)<br>elbasvir/grazoprevir (39% with ribavirin)                                                                                                               | 50/100mg<br>50/100mg | 8-18 weeks<br>8-18 weeks | 32<br>1657 | eGFR 56 (45-59) ml/min<br>eGFR 100 (61-364) ml/min | 12 weeks<br>12 weeks | eGFR 59 (38-78) ml/min<br>eGFR 100 (48-364) ml/min | 3<br>0     | nd<br>nd       | Poor    |
| 29020583        | Gane E, et al                                                                                                                              | 2017 | glecaprevir + pibrentasvir                                                                                                                                                                           | 300/120mg            | 12 weeks                 | 19         | eGFR 20.6                                          | 12 weeks             | eGFR 20.2                                          | -0.4       | nd             | Good    |
| 28882857        | Sise ME, et al                                                                                                                             | 2017 | Sofosbuvir-based therapy                                                                                                                                                                             | multiple             | 12 weeks                 | 98         | eGFR 60 (20) ml/min                                | 6 months             | unclear                                            |            |                |         |



**Table S6: Evidence profile: Treatment with direct-acting antiviral regimens in chronic HCV-infected CKD patients**

| Outcome                                      | # of Studies and Study Design                                           | Total N of Patients on Treatment | Methodological Quality of Studies      | Consistency Across Studies                   | Directness of the Evidence, including Applicability              | Other Considerations | Summary of Findings             |                                                                                                                                                                                                                                                                                  |                       |
|----------------------------------------------|-------------------------------------------------------------------------|----------------------------------|----------------------------------------|----------------------------------------------|------------------------------------------------------------------|----------------------|---------------------------------|----------------------------------------------------------------------------------------------------------------------------------------------------------------------------------------------------------------------------------------------------------------------------------|-----------------------|
|                                              |                                                                         |                                  |                                        |                                              |                                                                  |                      | Quality of Evidence for Outcome | Description of Findings                                                                                                                                                                                                                                                          | Importance of Outcome |
| <b>Death</b>                                 | 1 RCT<br>1 prospective<br>1 retrospective<br>1 cohort                   | 495                              | Some limitations (-1) <sup>‡</sup>     | No important inconsistencies (0)             | Direct (0)                                                       | Sparse (-1)          | Low                             | Inconclusive if DAA lowers mortality                                                                                                                                                                                                                                             | Critical              |
| <b>Sustained virological response</b>        | 1 RCT<br>14 prospective<br>4 retrospective<br>2 cohort<br>1 case series | 1597                             | Some limitations (-1) <sup>§</sup>     | No important inconsistencies (0)             | Direct (0)                                                       | None (0)             | Moderate                        | SVR12: 81-100% across DAA regimens* (SVR12: 0% in placebo arm)                                                                                                                                                                                                                   | High                  |
| <b>Discontinuation due to adverse events</b> | 1 RCT<br>8 prospective<br>3 retrospective<br>1 cohort<br>1 case series  | 1516                             | Some limitations (-1) <sup>  </sup>    | Important inconsistencies (-1) <sup>  </sup> | Direct (0)                                                       | None (0)             | Low                             | 0-8% <sup>†</sup>                                                                                                                                                                                                                                                                | High                  |
| <b>Serious adverse events</b>                | 1 RCT<br>5 prospective<br>2 retrospective<br>2 cohort                   | 789                              | Some limitations (-1) <sup>**</sup>    | Important inconsistencies (-1) <sup>  </sup> | Some uncertainty about directness of evidence (-1) <sup>‡‡</sup> | None (0)             | Very low                        | Sofosbuvir-based and Daclatasvir + Asunaprevir (4 studies) 0-8%<br>Grazoprevir + Elbasvir and Ombitasvir + Paritaprevir + Ritonavir + Dasabuvir +/- Ribavirin (2 studies): 14-20% (none attributed to DAA)<br>Glecaprevir + Pibrentasvir (1 study): 24% (none attributed to DAA) | Moderate              |
| <b>Hepatocellular carcinoma</b>              | 1 prospective                                                           | 34                               | Serious limitations (-2) <sup>††</sup> | NA                                           | Direct (0)                                                       | Sparse (-1)          | Very low                        | Daclatasvir + Asunaprevir 1/21 patients at 24 weeks (1 study)                                                                                                                                                                                                                    | Moderate              |
| <b>Kidney function, continuous</b>           | 2 prospective<br>2 retrospective                                        | 2243                             | Serious limitations (-2) <sup>††</sup> | NA                                           | Direct (0)                                                       | Sparse (-1)          | Very low                        | No significant change in eGFR with Sofosbuvir-based or Grazoprevir + Elbasvir in patients with CKD stages 1-5                                                                                                                                                                    | Moderate              |
| <b>Total N</b>                               |                                                                         | 3252                             |                                        |                                              |                                                                  |                      |                                 |                                                                                                                                                                                                                                                                                  |                       |

**Balance of Potential Benefits and Harms:**

DAA's yield very high rates of SVR 12 with low rates of discontinuation due to adverse events or serious adverse events attributable to DAAs

**Quality of Overall Evidence:**

Low

**Studies included in EP:** 26456905, 26583882, AASLD 2015 1099, AASLD 2015 1158, 26923436; ILC 2015 LP08, ILC 2015 P0802, ILC 2015 P0878, AASLD 2015 2256, 26976799, 26872889, 27098678, 26768604, 27771774, 27602542, ASN TH-PO1143, AASLD 909, AASLD 950, AASLD 1967, AASLD 1982, 27943523, 29020583, 29270489, 28882857, 28576451, ASN PUB204, AASLD 889

**Abbreviations:** CKD: chronic kidney disease; DAA: direct-acting antivirals; GFR: glomerular filtration rate; RCT: randomized controlled trial; SVR: sustained virological response

**Annotations:**

\* Sofosbuvir-based 81-100% SVR (8 studies), Daclatasvir + Asunaprevir 90-100% (8 studies), Grazoprevir + Elbasvir 94-95% (2 studies), Ombitasvir + Paritaprevir + Ritonavir + Dasabuvir +/- Ribavirin 90-100% (2 studies), Glecaprevir + Pibrentasvir 98% (1 study)  
† Sofosbuvir-based 0-8%% SVR (3 studies), Daclatasvir + Asunaprevir 0-4% (6 studies), Grazoprevir + Elbasvir 0-4% (2 studies), Ombitasvir + Paritaprevir + Ritonavir + Dasabuvir +/- Ribavirin 0% (1 study), Glecaprevir + Pibrentasvir 5% (1 study)

‡ 2 good quality; 2 fair quality

§ 7 good quality; 7 fair quality; 8 poor quality

|| Mix of CKD 1-5 both dialysis and non-dialysis patients

¶ 5 good quality; 5 fair quality; 3 poor quality

\*\*5 good quality; 2 fair quality; 3 poor quality

†† 1 poor quality study

‡‡ Inconsistent definitions

Table S7: Summary Table  
 Treatment with direct-acting antiviral regimens in kidney  
 transplant recipients with chronic HCV infection  
 Categorical outcomes

| PMID            | Author                                                                                                                                                    | Year | Type of article           | Study design                     | Sample size | CKD stage | Kidney function                                                                         | Viral HCV RNA                                                                  | HCV genotype                           | Outcome                                                                               |
|-----------------|-----------------------------------------------------------------------------------------------------------------------------------------------------------|------|---------------------------|----------------------------------|-------------|-----------|-----------------------------------------------------------------------------------------|--------------------------------------------------------------------------------|----------------------------------------|---------------------------------------------------------------------------------------|
| 26587971        | Kamar N., Marion O., Rostaing L., Cointault O., Ribes D., Lavayssière L., Esposito L., Del Bello A., Métivier S., Barange K., Izopet J., Alric L.         | 2015 | Peer-reviewed publication | Single arm (cohort), unclear     | 25          | KTR       | GFR: 64 (21) ml/min; SCr: 117 (57) µmol/L                                               | 6.33 (0.6) log IU/mL                                                           | 1a: 16%; 1b: 60%; 2: 8%; 3: 4%; 4: 12% | Kidney Graft Failure/Loss<br><br>SVR12<br>SVR24                                       |
| 26604182        | Sawinski D., Kaur N., Ajeti A., Trofe-Clark J., Lim M., Bleicher M., Goral S., Forde KA., Bloom RD.                                                       | 2015 | Peer-reviewed publication | Retrospective cohort             | 20          | KTR       | SCr: 1.39 (range 0.74-2.24)                                                             | median 6.5 log copies/mL (IQR 6.3-7)                                           | 1a: 30%; 1b: 30%; 1: 25%; 2: 15%       | SVR12<br><br>Discontinuation due to AEs<br>Acute kidney injury                        |
| AASLD 2015 1148 | Bhamidimarri KR., Roth D., Guerra G., Levy C., Martin P.                                                                                                  | 2015 | Abstract                  | Single arm (cohort), prospective | 14          | KTR       | GFR: 60 ml/min                                                                          | 3.4 million IU                                                                 | 1a: 79%; 1b: 21%                       | SVR12                                                                                 |
| ATC 2015 3034   | Sharfuddin A, Taber T, Mujtaba M, Yaqub M, Mishler D, Kwo P, Vuppalachchi R                                                                               | 2015 | Abstract                  | Single arm (cohort), prospective | 12          | KTR       | SCr: 1.9 (0.6); proteinuria: 2.2 (2.2)                                                  | 25.6 (38.0) million IU/mL                                                      | 1a: 91.7%                              | SVR12<br><br>Relapse (viral)<br>Relapse (viral)<br>Discontinuation<br>Serious AEs     |
| 27842383        | Colombo M., Aghemo A., Liu H., Dvory-Sobol H., Hyland RH., Yun C., Brainard D.M., McHutchison J.G., Bourlière M., Peck-Radosavljevic M., Manns M., Pol S. | 2017 | Peer-reviewed publication | RCT                              | 114         | KTR       | GFR: median 56 mL/min/1.73m2 (range 35, 135)                                            | median 6.3 (range 4.5, 7.6) log10 IU/mL                                        | 1: 2% 1a:15% 1b: 75% 4: 9%             | SVR12<br><br>SVR24<br><br>Discontinuation due to AEs<br><br>Serious AEs<br><br>Deaths |
| 27495770        | Eisenberger, U. and Guberina, H. and Willuweit, K. and Bienholz, A. and Kribben, A. and Gerken, G. and Witzke, O. and Herzer, K.                          | 2016 | Peer-reviewed publication | Retrospective cohort             | 15          | KTR       | GFR: median 77.9 ml/min/1.73m2 (36.4, 124)<br>SCr: median 1.22 mg/dL (range 0.77, 2.04) | median 1.2 x 10 <sup>6</sup> (range 3007, 9.3 x 10 <sup>6</sup> ) log 10 IU/mL | 1a: 27% 1b: 67% 4: 7%                  | SVR12                                                                                 |
| 0               | Kirushnan B, M.A. Shujaiddin, K. Arumugam, R. Ravichandran                                                                                                | 2016 | Peer-reviewed publication | Retrospective cohort             | 20          | KTR       | SCr: 1.41 (0.54) mg%                                                                    | median 3,394,705 IU/ml                                                         | 1: 60% 2: 0% 3: 30% 4: 5% 1a and 2: 5% | Mid to Moderate Adverse Events<br>SVR12                                               |

| PMID                                                                              | Author                                                                                            | Year | Type of article           | Study design                         | Sample size                                       | CKD stage | Kidney function                                     | Viral HCV RNA                        | HCV genotype                                        | Outcome                                                                                  |
|-----------------------------------------------------------------------------------|---------------------------------------------------------------------------------------------------|------|---------------------------|--------------------------------------|---------------------------------------------------|-----------|-----------------------------------------------------|--------------------------------------|-----------------------------------------------------|------------------------------------------------------------------------------------------|
| ASN TH-PO770                                                                      | Gonzalez Corvillo C., MA<br>Gentil Govantes, A.<br>Sanchez Fructuoso, A.<br>Mazuecos.             | 2016 | Abstract                  | Prospective and retrospective cohort | 110 (119 with 9 combined liver-kidney transplant) | KTR       | nd                                                  | nd                                   | 1a: 13.8% 1b: 68.1% 2: 4.3% 3: 7.8% 4: 6%           | SVR<br>Discontinuation due to AEs<br>Deaths                                              |
| ASN TH-PO772                                                                      | Prasad N., M. Ranjan<br>Patel, A. Jaiswal, D.<br>Bhadauria, R.K. Sharma,<br>A. Gupta              | 2016 | Abstract                  | Prospective cohort                   | 22                                                | KTR       | nd                                                  | range 96425-24175475 copies logIU/mL | 1: 27.2% 2: 4.5% 3: 63.6% 4: 4.5%                   | SVR12<br>SVR24                                                                           |
| ASN TH-PO774                                                                      | Kusnir J.E., A. Dejman, K.<br>Bhamidimarri, F.E.<br>Pedraza, M.A.<br>LadinoAvellaneda, D.<br>Roth | 2016 | Abstract                  | Prospective cohort                   | 21                                                | KTR       | nd                                                  | nd                                   | nd                                                  | SVR 12                                                                                   |
| 28009781                                                                          | Lubetzky M, et al                                                                                 | 2017 | Peer-reviewed publication | Retrospective cohort                 | 31                                                | KTR       | Scr: 1.3 (0.4) mg/dL<br>GFR: 64.2 (16.5) mL/min/BSA | nd                                   | nd                                                  | SVR12<br>Patient survival<br>Graft survival                                              |
| 28239909                                                                          | Morales AL, et al                                                                                 | 2017 | Peer-reviewed publication | Retrospective cohort                 | 32                                                | KTR       | nd                                                  | nd                                   | 1a: 62.5%, 1b: 28.1%; 2: 3.1%; 3: 3.1%; 4: 3.1%     | SVR12<br>Patient survival                                                                |
| 28703905                                                                          | Taneja S, et al                                                                                   | 2017 | Peer-reviewed publication | Prospective cohort                   | 47                                                | KTR       | eGFR 67.8 ml/min                                    | 7.38 x10^6 IU/ml                     | 1: 68%, 2: 2%, 3: 21%, 4: 9%                        | SVR12<br>Treatment discontinuation                                                       |
| 28504842                                                                          | Saxena V, et al                                                                                   | 2017 | Peer-reviewed publication | Retrospective cohort                 | 60                                                | KTR       | eGFR 58.5 ml/min (7.4-156.4)                        | 6.3 x 10^6 IU/ml                     | 1a: 48%, 1b: 37%; 2: 2%; 3: 3%; 4: 3%; 5: 0%; 6: 2% | SVR12<br>Acute rejection<br>Treatment discontinuation<br>Patient survival                |
| 28332729                                                                          | Bhamidimarri KR, et al                                                                            | 2017 | Peer-reviewed publication | Prospective cohort                   | 25                                                | KTR       | Scr 1.3 mg/dL                                       | nd                                   | 1a: 68%; 1b: 24%; 2: 4%; 3: 4%                      | SVR12<br>Acute rejection                                                                 |
| 28039098                                                                          | Fernandez I, et al                                                                                | 2017 | Peer-reviewed publication | Retrospective cohort                 | 103                                               | KTR       | Scr 1.7mg/dL (0.6-8.8)                              | 6.6 x 10^6 IU/ml                     | 1a: 8%, 1b: 74%; 2: 0%; 3: 6%; 4: 8%; 5: 2%; 6: 0%  | SVR12<br>Acute rejection                                                                 |
| Journal of Hepatology 2017<br>vol. 66   S63-S94 (and ASN<br>2017 poster SA-PO496) | Reau, et al                                                                                       | 2017 | Conference poster         | Prospective cohort                   | 20                                                | KTR       | eGFR <60 ml/min 55%; >=90 10%                       | >6 x 10^6 IU/ml 20%                  | 1a: 30%; 1b: 55%; 3: 10%; 4: 5%                     | SVR12<br>Patient survival<br>Graft survival<br>Discontinuation due to AEs<br>Serious AEs |

Table S7: Summary Table  
 Treatment with direct-acting antiviral regimens in kidney  
 transplant recipients with chronic HCV infection  
 Categorical outcomes

| PMID            | Author                                                                                                                                                    | Year | Definition                              | Arm                                           | Duration                             | Timepoint                      | Frequency/Rate              | Relative effect | p-value | Quality          | Dose                                 |
|-----------------|-----------------------------------------------------------------------------------------------------------------------------------------------------------|------|-----------------------------------------|-----------------------------------------------|--------------------------------------|--------------------------------|-----------------------------|-----------------|---------|------------------|--------------------------------------|
| 26587971        | Kamar N., Marion O., Rostaing L., Cointault O., Ribes D., Lavayssière L., Esposito L., Del Bello A., Métivier S., Barange K., Izopet J., Alric L.         | 2015 |                                         | sofosbuvir + daclatasvir/simeprevir + peg-IFN | nd                                   | nd                             | 0/25 (0%)                   | ND              | ND      | Poor             | 400 mg OD + 60/150 mg OD + 135 mg QW |
|                 |                                                                                                                                                           |      |                                         | sofosbuvir + daclatasvir/simeprevir + peg-IFN | nd                                   | 12 weeks                       | 25/25 (100%)                | ND              | ND      |                  |                                      |
| 26604182        | Sawinski D., Kaur N., Ajeti A., Trofe-Clark J., Lim M., Bleicher M., Goral S., Forde KA., Bloom RD.                                                       | 2015 |                                         | HCV therapy + Immunosuppression               | 12 weeks                             | 12 weeks                       | 20/20 (100%)                | ND              | ND      | Good             | nd                                   |
|                 |                                                                                                                                                           |      |                                         | HCV therapy + Immunosuppression               | 12 weeks                             | 37 weeks                       | 0/20 (0%)                   | ND              | ND      |                  |                                      |
|                 |                                                                                                                                                           |      | SCr ↑0.25 mg/dl                         | HCV therapy + Immunosuppression               | 12 weeks                             | 37 weeks                       | 4/20 (20%)                  | ND              | ND      |                  |                                      |
| AASLD 2015 1148 | Bhamidimarri KR., Roth D., Guerra G., Levy C., Martin P.                                                                                                  | 2015 |                                         | sofosbuvir/ledipasvir                         | nd                                   | 12 weeks                       | 1/1 (100%)                  | ND              | ND      | Fair             | nd                                   |
| ATC 2015 3034   | Sharfuddin A, Taber T, Mujtaba M, Yaqub M, Mishler D, Kwo P, Vuppalanchi R                                                                                | 2015 |                                         | sofosbuvir-based therapy                      | 12-24 weeks                          | 12 weeks                       | 2/3 (67%)                   | ND              | ND      | Poor             |                                      |
|                 |                                                                                                                                                           |      |                                         | sofosbuvir-based therapy                      | 12-24 weeks                          | 4 weeks                        | 1/9 (11%)                   | ND              | ND      |                  |                                      |
|                 |                                                                                                                                                           |      |                                         | sofosbuvir-based therapy                      | 12-24 weeks                          | 12 weeks                       | 1/3 (33%)                   | ND              | ND      |                  |                                      |
|                 |                                                                                                                                                           |      |                                         | sofosbuvir-based therapy                      | 12-24 weeks                          | 12 weeks                       | 1/3 (33%)                   | ND              | ND      |                  |                                      |
|                 |                                                                                                                                                           |      | anemia                                  | sofosbuvir-based therapy                      | 12-24 weeks                          | nd                             | 5/12 (42%)                  | ND              | ND      |                  |                                      |
| 27842383        | Colombo M., Aghemo A., Liu H., Dvory-Sobol H., Hyland RH., Yun C., Brainard D.M., McHutchison J.G., Bourlière M., Peck-Radosavljevic M., Manns M., Pol S. | 2017 |                                         | ledipasvir + sofosbuvir for 12 weeks          | 12 weeks                             | 12 weeks                       | 57/57 (100%)                | ND              | ND      | Good             | 90mg + 400 mg OD                     |
|                 |                                                                                                                                                           |      |                                         | ledipasvir + sofosbuvir for 24 weeks          | 24 weeks                             |                                | 57/57 (100%)                | ND              | ND      | 90mg + 400 mg OD |                                      |
|                 |                                                                                                                                                           |      |                                         | ledipasvir + sofosbuvir for 12 weeks          | 12 weeks                             | 24 weeks                       | NA                          | ND              | ND      | 90mg + 400 mg OD |                                      |
|                 |                                                                                                                                                           |      |                                         | ledipasvir + sofosbuvir for 24 weeks          | 24 weeks                             |                                | 57/57 (100%)                | ND              | ND      | 90mg + 400 mg OD |                                      |
|                 |                                                                                                                                                           |      |                                         | ledipasvir + sofosbuvir for 12 weeks          | 12 weeks                             | 30 days after the last dose    | 1/57 (2%)                   | ND              | ND      | 90mg + 400 mg OD |                                      |
|                 |                                                                                                                                                           |      |                                         | ledipasvir + sofosbuvir for 24 weeks          | 24 weeks                             |                                | 0/57 (0%)                   | ND              | ND      | 90mg + 400 mg OD |                                      |
|                 |                                                                                                                                                           |      |                                         | treatment-related searious adverse events     | ledipasvir + sofosbuvir for 12 weeks | 12 weeks                       | 30 days after the last dose | 1/57 (2%)       | ND      | ND               | 90mg + 400 mg OD                     |
|                 |                                                                                                                                                           |      |                                         |                                               | ledipasvir + sofosbuvir for 24 weeks | 24 weeks                       |                             | 2/57 (4%)       | ND      | ND               | 90mg + 400 mg OD                     |
|                 |                                                                                                                                                           |      |                                         | all serious adverse events                    | ledipasvir + sofosbuvir for 12 weeks | 12 weeks                       | 30 days after the last dose | 5/57 (9%)       | ND      | ND               | 90mg + 400 mg OD                     |
|                 |                                                                                                                                                           |      |                                         |                                               | ledipasvir + sofosbuvir for 24 weeks | 24 weeks                       |                             | 8/57 (14%)      | ND      | ND               | 90mg + 400 mg OD                     |
|                 |                                                                                                                                                           |      |                                         |                                               | ledipasvir + sofosbuvir for 12 weeks | 12 weeks                       | 30 days after the last dose | 0/57 (0%)       | ND      | ND               | 90mg + 400 mg OD                     |
|                 |                                                                                                                                                           |      |                                         |                                               | ledipasvir + sofosbuvir for 24 weeks | 24 weeks                       |                             | 0/57 (0%)       | ND      | ND               | 90mg + 400 mg OD                     |
| 27495770        | Eisenberger, U. and Guberina, H. and Willuweit, K. and Bienholz, A. and Kribben, A. and Gerken, G. and Witzke, O. and Herzer, K.                          | 2016 |                                         | ledipasvir + sofosbuvir for 8 weeks           | 8 weeks                              | 12 weeks                       | 3/3 (100%)                  | ND              | ND      | Fair             | 90mg + 400 mg OD                     |
|                 |                                                                                                                                                           |      |                                         | ledipasvir + sofosbuvir for 12 weeks          | 12 weeks                             | 12 weeks                       | 12/12 (100%)                | ND              | ND      | 90mg + 400 mg OD |                                      |
|                 |                                                                                                                                                           |      | fatigue, headache, nausea, hypertension | all patients                                  | 8 or 12 weeks                        | up to 12 weeks after treatment | 5/15 (33%)                  | ND              | ND      |                  | 90mg + 400 mg OD                     |
| 0               | Kirushnan B, M.A. Shujauddin, K. Arumugam, R. Ravichandran                                                                                                | 2016 |                                         | sofosbuvir + ribavirin                        |                                      | 12 weeks                       | 10/13 (77%)                 | ND              | ND      | Fair             | 400 mg + dose adjusted               |

| PMID                                                                        | Author                                                                                          | Year | Definition                                                                                       | Arm                                                                                                                                                                                  | Duration                                     | Timepoint | Frequency/Rate | Relative effect | p-value | Quality | Dose       |
|-----------------------------------------------------------------------------|-------------------------------------------------------------------------------------------------|------|--------------------------------------------------------------------------------------------------|--------------------------------------------------------------------------------------------------------------------------------------------------------------------------------------|----------------------------------------------|-----------|----------------|-----------------|---------|---------|------------|
| ASN TH-PO770                                                                | Gonzalez Corvillo C., MA<br>Gentil Govantes, A.<br>Sanchez Fructuoso, A.<br>Mazuecos.           | 2016 | neurotoxicity caused by the interaction between 3D and tacrolimus and anemia caused by Ribavirin | sofosbuvir(91%) + ledipasvir (55%)<br>sofosbuvir (91%) + simeprevir (14%)<br>sofosbuvir (91%) + daclatasvir (13%)                                                                    | nd                                           | nd        | 110/110 (100%) | ND              | ND      | Poor    | nd         |
|                                                                             |                                                                                                 |      |                                                                                                  | sofosbuvir(91%) + ledipasvir (55%)<br>sofosbuvir (91%) + simeprevir (14%)<br>sofosbuvir (91%) + daclatasvir (13%)                                                                    | nd                                           | nd        | 2/119 (1.6%)   | ND              | ND      |         | nd         |
|                                                                             |                                                                                                 |      |                                                                                                  | sofosbuvir(91%) + ledipasvir (55%)<br>sofosbuvir (91%) + simeprevir (14%)<br>sofosbuvir (91%) + daclatasvir (13%)                                                                    | nd                                           | nd        | 110/110 (100%) | ND              | ND      |         | nd         |
| ASN TH-PO772                                                                | Prasad N., M. Ranjan<br>Patel, A. Jaiswal, D.<br>Bhadauria, R.K. Sharma,<br>A. Gupta            | 2016 |                                                                                                  | sofosbuvir + ribavirin (63.6%)<br>sofosbuvir + ribavirin + daclatasvir (22.7%)<br>sofosbuvir + ribavirin + ledipasvir (13.6%)                                                        | 24 weeks                                     | 12 weeks  | 22/22 (100%)   | ND              | ND      | Poor    | nd         |
|                                                                             |                                                                                                 |      |                                                                                                  | sofosbuvir + ribavirin (63.6%)<br>sofosbuvir + ribavirin + daclatasvir (22.7%)<br>sofosbuvir + ribavirin + ledipasvir (13.6%)                                                        | 12 weeks minimum                             | 24 weeks  | 22/22 (100%)   | ND              | ND      |         | nd         |
| ASN TH-PO774                                                                | Kusnir J.E., A. Dejman, K.<br>Bhamidimarri, F.E.<br>Pedraza, M.A.<br>LadinoAvellana, D.<br>Roth | 2016 |                                                                                                  | sofosbuvir + ledipasvir + ribavirin (61.9%)<br>sofosbuvir + ledipasvir (23.8%)<br>sofosbuvir + daclatasvir (4.8%)<br>sofosbuvir + simeprevir (4.8%)<br>sofosbuvir + ribavirin (4.8%) | 12 weeks                                     | 12 weeks  | 21/21 (100%)   | ND              | ND      | Poor    | nd         |
| 28009781                                                                    | Lubetzky M, et al                                                                               | 2017 |                                                                                                  | DAA, most commonly sofosbuvir + ledipasvir (67.7%)                                                                                                                                   | 12 weeks                                     | 12 weeks  | 30/31 (97%)    | ND              | ND      | Fair    | nd         |
|                                                                             |                                                                                                 |      |                                                                                                  | DAA, most commonly sofosbuvir + ledipasvir (67.7%)                                                                                                                                   | 12 weeks                                     | nd        | 31/31 (100%)   | ND              | ND      |         | nd         |
|                                                                             |                                                                                                 |      |                                                                                                  | DAA, most commonly sofosbuvir + ledipasvir (67.7%)                                                                                                                                   | 12 weeks                                     | nd        | 31/31 (100%)   | ND              | ND      |         | nd         |
| 28239909                                                                    | Morales AL, et al                                                                               | 2017 |                                                                                                  | Sofosbuvir+ledipasvir                                                                                                                                                                | 8 weeks (9%); 12 weeks (66%), 24 weeks (25%) | 12 weeks  | 27/32 (84%)    | ND              | ND      | Fair    | nd         |
|                                                                             |                                                                                                 |      |                                                                                                  | Sofosbuvir+ledipasvir                                                                                                                                                                |                                              | 12 weeks  | 28/32 (87%)    | ND              | nd      |         | nd         |
| 28703905                                                                    | Taneja S, et al                                                                                 | 2017 |                                                                                                  | Sofosbuvir+ribavirin                                                                                                                                                                 | 24 weeks                                     | 12 weeks  | 12/14 (86%)    | ND              | nd      | Fair    | mult       |
|                                                                             |                                                                                                 |      |                                                                                                  | Sofosbuvir+ ledipasvir +/- ribavirin                                                                                                                                                 | 12 weeks                                     | 12 weeks  | 22/22 (100%)   | ND              | nd      |         | mult       |
|                                                                             |                                                                                                 |      |                                                                                                  | Sofosbuvir + daclatasvir +/- ribavirin                                                                                                                                               | 12 weeks                                     | 12 weeks  | 12/12 (100%)   | ND              | nd      |         | mult       |
|                                                                             |                                                                                                 |      |                                                                                                  | Sofosbuvir+ribavirin                                                                                                                                                                 | 24 weeks                                     | 12 weeks  | 2/14 (14%)     | ND              | nd      |         | mult       |
|                                                                             |                                                                                                 |      |                                                                                                  | Sofosbuvir+ ledipasvir +/- ribavirin                                                                                                                                                 | 12 weeks                                     | 12 weeks  | 0/22 (0%)      | ND              | nd      |         | mult       |
|                                                                             |                                                                                                 |      |                                                                                                  | Sofosbuvir + daclatasvir +/- ribavirin                                                                                                                                               | 12 weeks                                     | 12 weeks  | 0/12 (0%)      | ND              | nd      |         | mult       |
| 28504842                                                                    | Saxena V, et al                                                                                 | 2017 | biopsy proven                                                                                    | DAA, most commonly sofosbuvir+ ledipasvir +/- ribavirin (80%) but also sofosbuvir + daclatasvir +/- ribavirin (4%) and PrOD regimen (16%)                                            | 12 weeks                                     | 12 weeks  | 52/58 (90%)    | ND              | nd      | Fair    | mult       |
|                                                                             |                                                                                                 |      |                                                                                                  | DAA, most commonly sofosbuvir+ ledipasvir +/- ribavirin (80%) but also sofosbuvir + daclatasvir +/- ribavirin (4%) and PrOD regimen (16%)                                            | 12 weeks                                     | 12 weeks  | 2/58 (3%)      | ND              | nd      |         | mult       |
|                                                                             |                                                                                                 |      |                                                                                                  | DAA, most commonly sofosbuvir+ ledipasvir +/- ribavirin (80%) but also sofosbuvir + daclatasvir +/- ribavirin (4%) and PrOD regimen (16%)                                            | 12 weeks                                     | 12 weeks  | 4/60 (7%)      | ND              | nd      |         | mult       |
|                                                                             |                                                                                                 |      |                                                                                                  | DAA, most commonly sofosbuvir+ ledipasvir +/- ribavirin (80%) but also sofosbuvir + daclatasvir +/- ribavirin (4%) and PrOD regimen (16%)                                            | 12 weeks                                     | 12 weeks  | 60/60 (100%)   | ND              | nd      |         | mult       |
| 28332729                                                                    | Bhamidimarri KR, et al                                                                          | 2017 | biopsy proven                                                                                    | Sofosbuvir+ ledipasvir +/- ribavirin (96%)                                                                                                                                           | 12 weeks                                     | 12 weeks  | 24/25 (96%)    | ND              | nd      | Fair    | mult       |
|                                                                             |                                                                                                 |      |                                                                                                  | Sofosbuvir+ ledipasvir +/- ribavirin (96%)                                                                                                                                           | 12 weeks                                     | 12 weeks  | 4/25 (16%)     | ND              | nd      |         | mult       |
| 28039098                                                                    | Fernandez I, et al                                                                              | 2017 |                                                                                                  | DAA, most commonly sofosbuvir+ ledipasvir +/- ribavirin (57%) but also sofosbuvir + daclatasvir +/- ribavirin (17%) and PrOD regimen (10%)                                           | 12 weeks                                     | 12 weeks  | 101/103 (98%)  | ND              | nd      | Good    | mult       |
|                                                                             |                                                                                                 |      |                                                                                                  | DAA, most commonly sofosbuvir+ ledipasvir +/- ribavirin (57%) but also sofosbuvir + daclatasvir +/- ribavirin (17%) and PrOD regimen (10%)                                           | 12 weeks                                     | 12 weeks  | 4/103 (4%)     | ND              | nd      |         | mult       |
| Journal of Hepatology 2017 vol. 66   S63-S94 (and ASN 2017 poster SA-PO496) | Reau, et al                                                                                     | 2017 |                                                                                                  | Glecaprevir + Pibrentasvir                                                                                                                                                           | 12 weeks                                     | 12 weeks  | 20/20 (100%)   | ND              | nd      | Good    | 300+120 mg |
|                                                                             |                                                                                                 |      |                                                                                                  | Glecaprevir + Pibrentasvir                                                                                                                                                           | 12 weeks                                     | 24 weeks  | 20/20 (100%)   | ND              | nd      |         | 300+120 mg |
|                                                                             |                                                                                                 |      |                                                                                                  | Glecaprevir + Pibrentasvir                                                                                                                                                           | 12 weeks                                     | 24 weeks  | 20/20 (100%)   | ND              | nd      |         | 300+120 mg |
|                                                                             |                                                                                                 |      |                                                                                                  | Glecaprevir + Pibrentasvir                                                                                                                                                           | 12 weeks                                     | 12 weeks  | 0/20 (0%)      | ND              | nd      |         | 300+120 mg |
|                                                                             |                                                                                                 |      | None attributable to GP                                                                          | Glecaprevir + Pibrentasvir                                                                                                                                                           | 12 weeks                                     | 12 weeks  | 3/20 (15%)     | ND              | nd      |         | 300+120 mg |

Table S7: Summary Table  
 Treatment with direct-acting antiviral regimens in kidney transplant recipients with chronic HCV infection  
 Continuous outcomes

| PMID                          | Author                                                                                                                                                    | Year | Type of article           | Study design                     | Sample size | CKD stage | Kidney function                                                                      | Viral HCV RNA                                                                 | HCV genotype                           | Outcome                                                                                                              | Definition                                                                                                                                                                                 |
|-------------------------------|-----------------------------------------------------------------------------------------------------------------------------------------------------------|------|---------------------------|----------------------------------|-------------|-----------|--------------------------------------------------------------------------------------|-------------------------------------------------------------------------------|----------------------------------------|----------------------------------------------------------------------------------------------------------------------|--------------------------------------------------------------------------------------------------------------------------------------------------------------------------------------------|
| 26587971                      | Kamar N., Marion O., Rostaing L., Cointault O., Ribes D., Lavayssière L., Esposito L., Del Bello A., Métivier S., Barange K., Izopet J., Alric L.         | 2015 | Peer-reviewed publication | Single arm (cohort), unclear     | 25          | KTR       | GFR: 64 (21) ml/min; SCr: 117 (57) µmol/L                                            | 6.33 (0.6) log IU/mL                                                          | 1a: 16%; 1b: 60%; 2: 8%; 3: 4%; 4: 12% | Kidney Function, continuous                                                                                          | SCr, µmol/L                                                                                                                                                                                |
| ATC 2015 3034                 | Sharfuddin A, Taber T, Mujtaba M, Yaqub M, Mishler D, Kwo P, Vuppalanchi R                                                                                | 2015 | Abstract                  | Single arm (cohort), prospective | 12          | KTR       | SCr: 1.9 (0.6); proteinuria: 2.2 (2.2)                                               | 25.6 (38.0) million IU/mL                                                     | 1a: 91.7%                              | Kidney Function, continuous<br>Proteinuria, continuous                                                               | GFR, ml/min<br>proteinuria, g/day                                                                                                                                                          |
| 27842383, EASL 2016 Barcelona | Colombo M., Aghemo A., Liu H., Dvory-Sobol H., Hyland RH., Yun C., Brainard D.M., McHutchison J.G., Bourlière M., Peck-Radosavljevic M., Manns M., Pol S. | 2017 | Peer-reviewed publication | OL, pjase 2 RCT                  | 114         | KTR       | GFR: median 56 mL/min/1.73m2 (range 35, 135)                                         | median 6.3 (range 4.5, 7.6) log10 IU/mL                                       | 1: 2% 1a:15% 1b: 75% 4: 9%             | Kidney Function, continuous                                                                                          | change in mean GFR over time                                                                                                                                                               |
| 27495770                      | Eisenberger, U. and Guberina, H. and Willuweit, K. and Bienholz, A. and Kribben, A. and Gerken, G. and Witzke, O. and Herzer, K.                          | 2016 | Peer-reviewed publication | Retrospective cohort             | 15          | KTR       | GFR: median 77.9 ml/min/1.73m2 (36.4, 124) SCr: median 1.22 mg/dL (range 0.77, 2.04) | median 1.2 x 10 <sup>6</sup> (range 3007, 9.3 x 10 <sup>6</sup> ) log10 IU/mL | 1a: 27% 1b: 67% 4: 7%                  | Kidney Function, continuous                                                                                          | median GFR over time                                                                                                                                                                       |
| 27495759                      | Sawinski D, Patel N, Appolo B, Bloom RD                                                                                                                   | 2016 | Peer-reviewed publication | Retrospective                    | 43          | KTR       | SCr: median 1.49 mg/dL                                                               | median 6.6 (range 6.2,6.9) log10 IU/mL                                        | 1: 83.3%; 2: 16.7%                     | Kidney Function, continuous                                                                                          | median serum creatinine                                                                                                                                                                    |
| ASN TH-PO775                  | M. Lubetzky, M. Ajaimy, L. Kamal, M. Coco, E. Akalin, G. De Boccardo.                                                                                     | 2016 | Abstract                  | Retrospective cohort             | 31          | KTR       | SCr: 1.3 (0.4) mg/dL GFR: 64.2 (16.5) mL/min/BSA                                     | nd                                                                            | nd                                     | Kidney Function, continuous<br>Kidney Function, continuous<br>Proteinuria, continuous<br>Kidney Function, continuous | change in SCr after therapy, mg/dL<br>change in GFR by MDRD after therapy, mL/min/BSA<br>change in proteinuria after therapy, mg/g<br>change in median proteinuria/creatinine (P/C) ratios |
| ASN TH-PO777                  | M.R. Goetsch, R. Franco, A. Tamhane, M. Varshney, A. Kapil, E. Turner Overton, G. Towns                                                                   | 2016 | Abstract                  | Retrospective cohort             | 16          | KTR       | nd                                                                                   | nd                                                                            | nd                                     | Kidney Function, continuous<br>Kidney Function, continuous                                                           | absolute mean decrease in P/C ratios<br>absolute median percent decrease in P/C ratios                                                                                                     |

Table S7: Summary Table  
 Treatment with direct-acting antiviral regimens in kidney transplant recipients with chronic HCV infection  
 Continuous outcomes

| PMID                          | Author                                                                                                                                                    | Year | Arm                                                | Dose                                 | Duration    | N                  | Baseline Value       | Timepoint           | Value                | Change       | p-value | Quality |
|-------------------------------|-----------------------------------------------------------------------------------------------------------------------------------------------------------|------|----------------------------------------------------|--------------------------------------|-------------|--------------------|----------------------|---------------------|----------------------|--------------|---------|---------|
| 26587971                      | Kamar N., Marion O., Rostaing L., Cointault O., Ribes D., Lavayssière L., Esposito L., Del Bello A., Métivier S., Barange K., Izopet J., Alric L.         | 2015 | sofosbuvir + daclatasvir/simeprevir + peg-IFN      | 400 mg OD + 60/150 mg OD + 135 mg QW | nd          | 25                 | 117 (57)             | 12 weeks            | 126 (69)             | nd           | nd      | Poor    |
| ATC 2015 3034                 | Sharfuddin A, Taber T, Mujtaba M, Yaqub M, Mishler D, Kwo P, Vuppalanchi R                                                                                | 2015 | sofosbuvir-based therapy                           | nd                                   | 12-24 weeks | 12                 | 2.2 (2.2)            | 24 weeks            | 1.7 (1.9)            | nd           | nd      | Poor    |
| 27842383, EASL 2016 Barcelona | Colombo M., Aghemo A., Liu H., Dvory-Sobol H., Hyland RH., Yun C., Brainard D.M., McHutchison J.G., Bourlière M., Peck-Radosavljevic M., Manns M., Pol S. | 2017 | ledipasvir + sofosbuvir for 12 weeks               | 90mg + 400 mg OD                     | 12 weeks    | 57                 | 59.1 (20.51)         | 12 weeks            | 57 (21.23)           | -1.6 (7.62)  | nd      | Good    |
|                               |                                                                                                                                                           |      | ledipasvir + sofosbuvir for 24 weeks               | 90mg + 400 mg OD                     | 24 weeks    | 57                 | 63.5 (20.26)         |                     | 61.9 (18.66)         | -2.0 (8.97)  |         |         |
|                               |                                                                                                                                                           |      | ledipasvir + sofosbuvir for 12 weeks               | 90mg + 400 mg OD                     | 12 weeks    | 57                 | 59.1 (20.51)         | 24 weeks            | NA                   | NA           | nd      |         |
|                               |                                                                                                                                                           |      | ledipasvir + sofosbuvir for 24 weeks               | 90mg + 400 mg OD                     | 24 weeks    | 57                 | 63.5 (20.26)         |                     | 60.6 (19.76)         | -2.7 (10.00) |         |         |
| 27495770                      | Eisenberger, U. and Guberina, H. and Willuweit, K. and Bienholz, A. and Kribben, A. and Gerken, G. and Witzke, O. and Herzer, K.                          | 2016 | ledipasvir + sofosbuvir for 8/12 weeks             | 90mg + 400 mg OD                     | 8/12 weeks  | 15                 | 77.9 (36.4, 124)     | EOT (8 or 12 weeks) | 69.1 (32.5, 120.5)   | nd           | 0.99    | Poor    |
| 27495759                      | Sawinski D, Patel N, Appolo B, Bloom RD                                                                                                                   | 2016 | LDV+SOF: ledipasvir/sofosbuvir                     | nd                                   | 12 weeks    | 24                 | 1.46 mg/dL           | 12 weeks            | 1.49 mg/dL           | nd           | nd      | Fair    |
|                               |                                                                                                                                                           |      | LDV+SOF+RBV: ledipasvir/sofosbuvir with ribavirin  | nd                                   | 12 weeks    | 24                 | 1.46 mg/dL           | 12 weeks            | 1.49 mg/dL           | nd           | nd      |         |
|                               |                                                                                                                                                           |      | SOF+RBV: sofosbuvir/ribavirin                      | nd                                   | 12 weeks    | 24                 | 1.46 mg/dL           | 12 weeks            | 1.49 mg/dL           | nd           | nd      |         |
|                               |                                                                                                                                                           |      | SOF+SIM: sofosbuvir/simeprevir                     | nd                                   | 12 weeks    | 24                 | 1.46 mg/dL           | 12 weeks            | 1.49 mg/dL           | nd           | nd      |         |
|                               |                                                                                                                                                           |      | HCV+ donor                                         | nd                                   |             | 485 (IQR 228,783)  | nd                   | nd                  | nd                   | nd           | 0.02    |         |
|                               |                                                                                                                                                           |      | HCV- donor                                         | nd                                   |             | 969 (IQR 452,2008) | nd                   | nd                  | nd                   | nd           |         |         |
| ASN TH-PO775                  | M. Lubetzky, M. Ajaimy, L. Kamal, M. Coco, E. Akalin, G. De Boccardo.                                                                                     | 2016 | DAA, most commonly sofosbuvir + ledipasvir (67.7%) | nd                                   | 12 weeks    | 31                 | 1.3 mg/dL            | 12 weeks            | 1.4 mg/dL            | 0.1          | 0.25    | Fair    |
|                               |                                                                                                                                                           |      | DAA, most commonly sofosbuvir + ledipasvir (67.7%) | nd                                   | 12 weeks    | 31                 | 64.2 mL/min/BSA      | 12 weeks            | 58.9 mL/min/BSA      | -5.3         | 0.22    |         |
|                               |                                                                                                                                                           |      | DAA, most commonly sofosbuvir + ledipasvir (67.7%) | nd                                   | 12 weeks    | 31                 | 0.66 mg/g            | 12 weeks            | 1.1 mg/g             | 0.44         | 0.1     |         |
| ASN TH-PO777                  | M.R. Goetsch, R. Franco, A. Tamhane, M. Varshney, A. Kapil, E. Turner Overton, G. Towns                                                                   | 2016 | DAA treatment                                      | nd                                   | nd          | 14                 | 0.176 (0.165, 0.385) | nd                  | 0.107 (0.081, 0.151) | -0.069       | 0.001   | Poor    |
|                               |                                                                                                                                                           |      | DAA treatment                                      | nd                                   | nd          | 14                 | nd                   | nd                  | nd                   | 0.118        | nd      |         |
|                               |                                                                                                                                                           |      | DAA treatment                                      | nd                                   | nd          | 14                 | nd                   | nd                  | nd                   | 0.5          | nd      |         |



**Table S8: Evidence profile: Treatment with direct-acting antiviral regimens in kidney transplant recipients with chronic HCV infection**

| Outcome                                      | # of Studies and Study Design                              | Total N of Patients on Treatment | Methodological Quality of Studies     | Consistency Across Studies       | Directness of the Evidence, including Applicability | Other Considerations                | Summary of Findings             |                                                                         |                       |
|----------------------------------------------|------------------------------------------------------------|----------------------------------|---------------------------------------|----------------------------------|-----------------------------------------------------|-------------------------------------|---------------------------------|-------------------------------------------------------------------------|-----------------------|
|                                              |                                                            |                                  |                                       |                                  |                                                     |                                     | Quality of Evidence for Outcome | Description of Findings                                                 | Importance of Outcome |
| <b>Mortality</b>                             | 1 RCT<br>2 prospective<br>3 retrospective                  | 367                              | Some limitations (-1) <sup>A</sup>    | No important inconsistencies (0) | Direct (0)                                          | Limited follow-up <sup>B</sup> (-1) | Low                             | Mortality 0% 12-24 weeks post-treatment (13% in one uncontrolled study) | Critical              |
| <b>Kidney failure / graft loss</b>           | 1 prospective<br>2 retrospective                           | 76                               | Some limitations (-1) <sup>C</sup>    | No important inconsistencies (0) | Direct (0)                                          | Sparse (-1)                         | Low                             | Graft loss rates 0% 12-24 weeks post-treatment                          | Critical              |
| <b>Sustained virological response</b>        | 1 RCT<br>8 prospective<br>8 retrospective                  | 558                              | Some limitations (-1) <sup>D</sup>    | No important inconsistencies (0) | Direct (0)                                          | None (0)                            | Moderate                        | SVR12 in 537/558 (96%) across DAA regimens                              | High                  |
| <b>Discontinuation due to adverse events</b> | 1 RCT<br>4 prospective<br>2 retrospective                  | 293                              | Some limitations (-1) <sup>E</sup>    | Some inconsistency (-1)          | Direct (0)                                          | None (0)                            | Low                             | 10/293 (3.4%) across DAA regimens (range 0-14% <sup>F</sup> )           | High                  |
| <b>Serious adverse events</b>                | 1 RCT<br>2 prospective                                     | 89                               | Some limitations (-1) <sup>G</sup>    | No important inconsistencies (0) | Indirect (-1) <sup>H</sup>                          | Sparse (-1)                         | Low                             | None attributable to DAA                                                | Moderate              |
| <b>Kidney function, continuous</b>           | 1 RCT (different durations)<br>5 retrospective<br>1 cohort | 272                              | Some limitations (-1) <sup>I</sup>    | Some inconsistency (-1)          | Direct (0)                                          | Sparse (-1)                         | Very Low                        | No to small change in SCr or eGFR (0-5 mL/min in 6 months)              | Moderate              |
| <b>Proteinuria, continuous</b>               | 1 prospective<br>2 retrospective                           | 69                               | Serious limitations (-2) <sup>J</sup> | Some inconsistency (-1)          | Direct (0)                                          | Sparse (-1)                         | Very low                        | Variable changes in proteinuria (from -23% to + 39-67%)                 | Moderate              |

Total N 691

**Balance of Benefit and Harms:**

DAA's yield very high rates of SVR 12 with low rates of discontinuation due to adverse events. DAA treatment has minimal impact on kidney function and variable effect on proteinuria.

**Quality of Overall Evidence:**

Low

**Studies included in EP:** 26587971, 26604182, AASLD 2015 1148, ATC 2015 3034, 27842383, 27495770, ASN TH-PO770, ASN TH-PO772, ASN TH-PO774, 28009781, 28239909, 28703905, 28504842, 28332729, 28039098, 27495759, ASN TH-PO777, Journal of Hepatology 2017 vol. 66 | S63-S94/ASN 2017 Poster SA-PO496, Kirushman 2016

**Abbreviations:** DAA: direct-acting antivirals; GFR: glomerular filtration rate; RCT: randomized controlled trial; SCr: serum creatinine; SVR: sustained virological response

**Annotations:**

A. 2 good quality, 3 fair quality, 1 poor quality.

B. Mostly 3 months after treatment.

C. 1 good quality, 1 fair quality, 1 poor quality.

D. 4 good quality, 8 fair quality, 5 poor quality.

E. 3 good quality, 2 fair quality; 2 poor quality.

F. Among studies with at least 10 participants.

G. 2 good, 1 poor.

H. Reporting and attribution of adverse events were unclear and inconsistent.

I. 1 good quality, 2 fair quality; 4 poor quality.

J. 1 fair quality, 2 poor quality.

Table S9: Summary Table  
Isolation of HCV patients receiving hemodialysis  
Categorical outcomes

| PMID     | Author                                                                                                                                                                                            | Year | Country      | Type of article           | Study design    | Sample size | CKD stage | Blood transfusions | HD vintage         | Outcome                   | Definition       | Arm                                                                                                                                                                                                                                                                                                                                                                      |
|----------|---------------------------------------------------------------------------------------------------------------------------------------------------------------------------------------------------|------|--------------|---------------------------|-----------------|-------------|-----------|--------------------|--------------------|---------------------------|------------------|--------------------------------------------------------------------------------------------------------------------------------------------------------------------------------------------------------------------------------------------------------------------------------------------------------------------------------------------------------------------------|
| 19147995 | Agarwal SK., Dash SC., Gupta S., Pandey RM.                                                                                                                                                       | 2009 | India        | Peer-reviewed publication | Pre-post design | 1285        | CKD HD    | 6.6 (3.9)          | nd                 | HCV seroconversion        | nd               | Isolation for HCV+, 2003-2006<br>No isolation for HCV+, 1995-1998                                                                                                                                                                                                                                                                                                        |
| 7753458  | Blumberg A., Zehnder C., Burckhardt JJ.                                                                                                                                                           | 1995 | Switzerland  | Peer-reviewed publication | Pre-post design | 131         | CKD HD    | nd                 | 2 weeks-284 months | HCV seroconversion        | nd               | Isolation for HCV+<br>No isolation for HCV+                                                                                                                                                                                                                                                                                                                              |
| 16903625 | Karkar A., Abdelrahman M., Ghacha R., Malik TQ.                                                                                                                                                   | 2006 | Saudi Arabia | Peer-reviewed publication | Pre-post design | 265         | CKD HD    | nd                 | 4-21 years         | HCV seroconversion        | nd               | Isolation for HCV+<br><br>No isolation for HCV+                                                                                                                                                                                                                                                                                                                          |
|          |                                                                                                                                                                                                   |      |              |                           |                 |             |           |                    |                    | HCV (antibody) positivity | nd               | Isolation for HCV+<br><br>No isolation for HCV+                                                                                                                                                                                                                                                                                                                          |
| 16685138 | Gallego E., López A., Pérez J., Llamas F., Lorenzo I., López E., Illescas ML., Andrés E., Olivas E., Gómez-Roldan C.                                                                              | 2006 | Spain        | Peer-reviewed publication | Pre-post design | 282         | CKD HD    | nd                 | nd                 | HCV seroconversion        | nd               | Strict/complete isolation for HCV+<br>Isolation for HCV+                                                                                                                                                                                                                                                                                                                 |
|          |                                                                                                                                                                                                   |      |              |                           |                 |             |           |                    |                    | HCV (antibody) positivity | nd               | Strict/complete isolation for HCV+<br><br>Isolation for HCV+                                                                                                                                                                                                                                                                                                             |
| 17382087 | Shebeb AM., Kotkat AM., Abd El Reheim SM., Farghaly AG., Fetohy EM.                                                                                                                               | 2006 | Egypt        | Peer-reviewed publication | nRCS, unclear   | 101         | CKD HD    | nd                 | 2.3 (1.4)          | HCV seroconversion        | nd               | Intervention program + no isolation<br><br>No intervention program + isolation<br>No intervention program + no isolation<br>Intervention program + no isolation<br>No intervention program + isolation<br>No intervention program + no isolation<br>Intervention program + no isolation<br>No intervention program + isolation<br>No intervention program + no isolation |
| 15469615 | Shamshirsaz AA., Kamgar M., Bekheirnia MR., Ayazi F., Hashemi SR., Bouzari N., Habibzadeh MR., Pourzahedgilani N., Broumand V., Shamshirsaz AH., Moradi M., Borghei M., Haghighi NN., Broumand B. | 2004 | Iran         | Peer-reviewed publication | RCT             | 442         | CKD HD    | 24%                | 21.6 month         | HCV (RNA) positivity      | incidence of HCV | dedicated HD machine<br>nondedicated HD machine<br>dedicated HD machine<br>nondedicated HD machine                                                                                                                                                                                                                                                                       |

Table S9: Summary Table  
Isolation of HCV patients receiving hemodialysis  
Categorical outcomes

| PMID     | Author                                                                                                                                                                                            | Year | Definition                                                                                                                                                                                                                                 | Timepoint                                                                                                                                 | Frequency/Rate                                                                                                                                                                                                                                                               | Relative effect                                                                                    | p-value                                                                                            | Quality |
|----------|---------------------------------------------------------------------------------------------------------------------------------------------------------------------------------------------------|------|--------------------------------------------------------------------------------------------------------------------------------------------------------------------------------------------------------------------------------------------|-------------------------------------------------------------------------------------------------------------------------------------------|------------------------------------------------------------------------------------------------------------------------------------------------------------------------------------------------------------------------------------------------------------------------------|----------------------------------------------------------------------------------------------------|----------------------------------------------------------------------------------------------------|---------|
| 19147995 | Agarwal SK., Dash SC., Gupta S., Pandey RM.                                                                                                                                                       | 2009 | separate room, separate machine<br>shared room, shared machine                                                                                                                                                                             | 3 years                                                                                                                                   | 2.7%<br>36.2%                                                                                                                                                                                                                                                                | nd                                                                                                 | <0.001                                                                                             | Fair    |
| 7753458  | Blumberg A., Zehnder C., Burckhardt JJ.                                                                                                                                                           | 1995 | separate machine, same room<br>nd                                                                                                                                                                                                          | 1992+<br>nd                                                                                                                               | 7/<131 (unclear)<br>0/nd (unclear)                                                                                                                                                                                                                                           | nd                                                                                                 | nd                                                                                                 | Poor    |
| 16903625 | Karkar A., Abdelrahman M., Ghacha R., Malik TQ.                                                                                                                                                   | 2006 | separate rooms, separate machines<br><br>nd<br><br>separate rooms, separate machines<br><br>nd                                                                                                                                             | 2005<br>2004<br>2003<br>2002<br>2001<br>2000<br>1999<br>1998<br>2005<br>2004<br>2003<br>2002<br>2001<br>2000<br>1999<br>1998<br>1996-2003 | 0/265 (0%)<br>0/265 (0%)<br>nd/265 (0.2%)<br>1/265 (0.3%)<br>7/265 (2.6%)<br>6/265 (2.3%)<br>6/265 (2.1%)<br>7/265 (2.7%)<br>77/265 (29%)<br>85/265 (32%)<br>90/265 (34%)<br>117/265 (44%)<br>151/265 (57%)<br>130/265 (49%)<br>148/265 (56%)<br>154/265 (58%)<br>0/171 (0%) | nd<br>nd<br>nd<br>nd<br>nd<br>nd<br>nd<br>nd<br>nd<br>nd<br>nd<br>nd<br>nd<br>nd<br>nd<br>nd<br>nd | nd<br>nd<br>nd<br>nd<br>nd<br>nd<br>nd<br>nd<br>nd<br>nd<br>nd<br>nd<br>nd<br>nd<br>nd<br>nd<br>nd | Poor    |
| 16685138 | Gallego E., López A., Pérez J., Llamas F., Lorenzo I., López E., Illescas ML., Andrés E., Olivas E., Gómez-Roldan C.                                                                              | 2006 | separate room, separate staff, separate machine<br>separate machines, shared room<br>separate room, separate staff, separate machine<br><br>separate machines, shared room                                                                 | 1993<br>2003<br>2003<br>2001<br>2000<br>1999<br>1998<br>1997<br>1996<br>1995<br>1994<br>1993<br>1992                                      | 2/144 (1.4%)<br>10/161 (6.2%)<br>14/175 (8.0%)<br>13/183 (7.1%)<br>17/172 (10%)<br>18/150 (12%)<br>23/161 (14.3%)<br>26/169 (15.4%)<br>31/171 (18.1%)<br>34/157 (21.7%)<br>38/146 (26.0%)<br>37/144 (25.7%)<br>37/121 (30.6%)                                                | nd<br>nd<br>nd<br>nd<br>nd<br>nd<br>nd<br>nd<br>nd<br>nd<br>nd<br>nd<br>nd                         | nd<br>nd<br>nd<br>nd<br>nd<br>nd<br>nd<br>nd<br>nd<br>nd<br>nd<br>nd<br>nd                         | Fair    |
| 17382087 | Shebeb AM., Kotkat AM., Abd El Reheim SM., Farghaly AG., Fetohy EM.                                                                                                                               | 2006 | Health Education Program (HEP)<br><br>isolation of seropositive patients<br>nd<br>Health Education Program (HEP)<br>isolation of seropositive patients<br>nd<br>Health Education Program (HEP)<br>isolation of seropositive patients<br>nd | 6 month<br><br>6-12 month<br><br>6-18 months                                                                                              | 1/10 (10%)<br><br>11/45 (24%)<br>2/19 (11%)<br>1/18<br>3/32<br>5/24<br>0/15<br>3/30<br>2/12                                                                                                                                                                                  | nd<br>nd<br>nd<br>nd<br>nd<br>nd<br>nd<br>nd<br>OR 0.65 (0.23, 1.80)<br>nd                         | nd<br>nd<br>nd<br>nd<br>nd<br>nd<br>nd<br>nd<br>nd<br>nd                                           | Poor    |
| 15469615 | Shamshirsaz AA., Kamgar M., Bekheirnia MR., Ayazi F., Hashemi SR., Bouzari N., Habibzadeh MR., Pourzahedgilani N., Broumand V., Shamshirsaz AH., Moradi M., Borghei M., Haghighi NN., Broumand B. | 2004 | The only difference between two groups of HD center<br><br>The only difference between two groups of HD center                                                                                                                             | 9 months<br><br>18 months                                                                                                                 | 4/254 (1.6%)<br><br>9/192 (4.7%)<br>2/160 (1.3%)<br>7/121 (5.8%)                                                                                                                                                                                                             | nd<br>nd<br>nd<br>nd                                                                               | 0.05<br><br><0.05                                                                                  | Good    |

**Table S10: Evidence profile: Isolation of HCV patients receiving hemodialysis**

| Outcome                                                                                                                                                                                                             | # of Studies and Study Design          | Total N of Patients | Methodological Quality of Studies                       | Consistency Across Studies                    | Directness of the Evidence, including Applicability             | Other Considerations | Summary of Findings                                    |                                                                                                                                                                                                                          |                       |
|---------------------------------------------------------------------------------------------------------------------------------------------------------------------------------------------------------------------|----------------------------------------|---------------------|---------------------------------------------------------|-----------------------------------------------|-----------------------------------------------------------------|----------------------|--------------------------------------------------------|--------------------------------------------------------------------------------------------------------------------------------------------------------------------------------------------------------------------------|-----------------------|
|                                                                                                                                                                                                                     |                                        |                     |                                                         |                                               |                                                                 |                      | Quality of Evidence for Outcome                        | Description of Findings                                                                                                                                                                                                  | Importance of Outcome |
| <b>HCV seroconversion</b>                                                                                                                                                                                           | 4 Pre-post design, 1 nRCS              | 2064                | Important Limitations* (-2)                             | No Important Inconsistencies <sup>†</sup> (0) | Some uncertainty about directness of evidence <sup>‡</sup> (-1) | None                 | Very Low                                               | Large reductions in rates of seroconversion in most studies, to 0% in 2 studies                                                                                                                                          | High                  |
| <b>HCV positivity</b>                                                                                                                                                                                               | 1 RCT<br>2 Pre-post design<br>1 cohort | 1072                | RCT: none<br>Observational: Important Limitations* (-2) | No Important Inconsistencies <sup>§</sup> (0) | Some uncertainty about directness of evidence <sup>‡</sup> (-1) | None                 | Low                                                    | Significantly lower event rate with dedicated HD machines (1.3% vs. 5.8%)<br>1 study with reduction post-isolation, but rate was already falling annually without isolation<br>2 studies with rate falling by about half | Moderate              |
| <b>Total N</b>                                                                                                                                                                                                      |                                        | 2543                |                                                         |                                               |                                                                 |                      |                                                        |                                                                                                                                                                                                                          |                       |
| <b>Balance of Potential Benefits and Harms:</b><br>Introduction of isolation associated with reduction in HCV seroconversion and HCV positivity; however, unclear if this was the primary cause of the improvement. |                                        |                     |                                                         |                                               |                                                                 |                      | <b>Quality of Overall Evidence:</b><br><b>Very Low</b> |                                                                                                                                                                                                                          |                       |

Studies included in EP: 19147995,7753458, 16903625, 16685138, 17382087, 15469615

**Abbreviations:** HCV = hepatitis C virus, HD = hemodialysis, nRCS = nonrandomized comparative study, RCT = randomized controlled trial.

**Annotations:**

\* Some studies did not incorporate or report the comparability of the baseline characteristics and co-interventions between groups in the study design and/or data analysis. Some studies did not report the compliance with the interventions. Mostly based on pre-post studies, where other factors may have changed also.

<sup>†</sup> HCV seroconversion rate was higher in the non-isolation group in most studies, while was slightly higher in the NRCS. There was great heterogeneity in measures for isolation.

<sup>‡</sup> Mostly limited to developing countries (Iran, Egypt, India, Macedonia, Saudi Arabia, Turkey; also Spain and Switzerland).

<sup>§</sup> HCV (antibody) positive rate was consistently higher in the non-isolation group, although it might reflect the decreased prevalence in the general population in the pre-post design.

**Table S11: Summary table**  
 Transplantation vs. waitlist among patients with HCV infection  
 Categorical outcomes

| PMID     | Author                                                                                  | Year | Type of article           | Study design | Database                         | Sample size | CKD stage | Kidney function | HCV+ | HCV genotype | Outcome          | Definition                                                                                        | Arm                                                                                                           |
|----------|-----------------------------------------------------------------------------------------|------|---------------------------|--------------|----------------------------------|-------------|-----------|-----------------|------|--------------|------------------|---------------------------------------------------------------------------------------------------|---------------------------------------------------------------------------------------------------------------|
| 21546575 | Roth D, Gaynor JJ, Reddy R, Ciancio G, Sageshima J, Kupin W, Guerra G, Chen L, Burke GW | 2011 | Peer-reviewed publication | nRCS         | United Network Organ Sharing     | 175         | nd        | nd              | nd   | nd           | Patient survival | relative risk of the impact of kidney transplantation on the HR of death                          | KTx                                                                                                           |
|          |                                                                                         |      |                           |              |                                  |             |           |                 |      |              |                  | relative risk of the impact of kidney transplantation on the HR of death from infection; relative | No KTx (candidates)<br>KTx                                                                                    |
|          |                                                                                         |      |                           |              |                                  |             |           |                 |      |              |                  | relative risk of the impact of kidney transplantation on the HR od death from CV event            | No KTx (candidates)<br>KTx                                                                                    |
| 25340605 | Scalea JR, Barth RN, Munivenkatappa R, Philosophie B, Cooper M, Whitlow V, LaMattina JC | 2015 | Peer-reviewed publication | nRCS         | nd                               | 1679        | nd        | nd              | nd   | nd           | Graft survival   | hazards ratio of multivariate analysis of variables associated with graft failure                 | Longer waitlist time                                                                                          |
| 15636622 | Bloom RD, Sayer G, Kosunarty F, Constantinescu S, Abt, Reddy KR                         | 2005 | Peer-reviewed publication | nRCS         | nd                               | 315         | nd        | nd              | 100% | nd           | Patient survival | Kaplan Meier                                                                                      | Shorter waitlist time<br>KTx                                                                                  |
| 9100052  | Knoll GA, Tankersley MR, Lee JY, Julian BA, Curtis JJ                                   | 1997 | Peer-reviewed publication | nRCS         | United Network for Organ Sharing | 58          | nd        | nd              | 100% | nd           | Patient survival | Kaplan Meier                                                                                      | No KTx (candidates)<br>KTx                                                                                    |
| 9573555  | Pereira BJ, Natov SN, Bouthot BA, Murthy BV, Ruthazer R, Schmid CH, Levey AS            | 1998 | Peer-reviewed publication | nRCS         | New England Organ Bank           | 287         | nd        | nd              | 100% | nd           | Patient survival | relative risk of death                                                                            | No KTx (candidates)<br>KTx<br>No KTx (candidates)<br>KTx<br>No KTx (candidates)<br>KTx<br>No KTx (candidates) |

Table S11: Summary table  
Transplantation vs. waitlist among patients with HCV infection  
Categorical outcomes

| PMID     | Author                                                                                  | Year | Timepoint               | Frequency/Rate | Relative effect     | p-value | Adjusted for                                                                                           |
|----------|-----------------------------------------------------------------------------------------|------|-------------------------|----------------|---------------------|---------|--------------------------------------------------------------------------------------------------------|
| 21546575 | Roth D, Gaynor JJ, Reddy R, Ciancio G, Sageshima J, Kupin W, Guerra G, Chen L, Burke GW | 2011 | 0-6 mo post-txp         | nd             | 2.51 (1.12, 5.66)   | 0.03    | simultaneous pancreas-kidney transplant listing, age 55 years, and white race                          |
|          |                                                                                         |      | >6-≤84 mo post-txp      | nd             | 0.32 (0.17, 0.62)   | 0.0007  | simultaneous pancreas-kidney transplant listing, age 55 years, and white race                          |
|          |                                                                                         |      | >84 mo post-txp         | nd             | 0.74 (0.19, 2.92)   | 0.66    | simultaneous pancreas-kidney transplant listing, age 55 years, and white race                          |
|          |                                                                                         |      | 0-6 mo post-txp         | nd             | 26.62 (5.01, 141.3) | 0.0001  | simultaneous pancreas-kidney transplant listing                                                        |
|          |                                                                                         |      | >6 months post-txp      | nd             | 1.69 (0.31, 9.14)   | 0.54    | simultaneous pancreas-kidney transplant listing                                                        |
|          |                                                                                         |      | overall post-txp effect | nd             | 0.20 (0.08, 0.47)   | 0.0002  | simultaneous pancreas-kidney transplant listing, age 55 years, and white race                          |
| 25340605 | Scalea JR, Barth RN, Munivenkatappa R, Philosophie B, Cooper M, Whitlow V, LaMattina JC | 2015 | 7.8 years               | nd             | 1.05 (1.01, 1.10)   | 0.02    | DGF, Donor age, R-D-, R+D+, R+D-, Retransplant, Pretransplant, History of recipient DM, Recipient race |
| 15636622 | Bloom RD, Sayer G, Kosunarty F, Constantinescu S, Abt, Reddy KR                         | 2005 | 96 months               | ~80%           | nd                  | 0.003   | nd                                                                                                     |
| 9100052  | Knoll GA, Tankersley MR, Lee JY, Julian BA, Curtis JJ                                   | 1997 | 48 months               | ~85%           | nd                  | 0.043   | nd                                                                                                     |
|          |                                                                                         |      |                         | ~70%           |                     |         |                                                                                                        |
| 9573555  | Pereira BJ, Natov SN, Bouthot BA, Murthy BV, Ruthazer R, Schmid CH, Levey AS            | 1998 | 0-3 months post-tx      | nd             | 4.75 (2.76, 8.17)   | nd      | nd                                                                                                     |
|          |                                                                                         |      | 4-6 months post-tx      | nd             | 1.76 (0.75, 4.13)   | nd      | nd                                                                                                     |
|          |                                                                                         |      | 7-47 months post-tx     | nd             | 0.31 (0.18, 0.54)   | nd      | nd                                                                                                     |
|          |                                                                                         |      | >48 months post-tx      | nd             | 0.84 (0.51, 1.37)   | nd      | nd                                                                                                     |
|          |                                                                                         |      |                         | nd             |                     |         |                                                                                                        |

**Table S12: Evidence profile: Transplantation vs. waitlist among patients with HCV infection**

| Outcome                                                                                                                                                  | # of Studies and Study Design | Total N of Patients | Methodological Quality of Studies | Consistency Across Studies       | Directness of the Evidence, including Applicability | Other Considerations | Summary of Findings                                    |                                                                         |                       |
|----------------------------------------------------------------------------------------------------------------------------------------------------------|-------------------------------|---------------------|-----------------------------------|----------------------------------|-----------------------------------------------------|----------------------|--------------------------------------------------------|-------------------------------------------------------------------------|-----------------------|
|                                                                                                                                                          |                               |                     |                                   |                                  |                                                     |                      | Quality of Evidence for Outcome                        | Description of Findings                                                 | Importance of Outcome |
| <b>Death</b>                                                                                                                                             | 4 retrospective               | 835                 | Serious limitations (-1)*         | No important inconsistencies (0) | Direct (0)                                          | None (0)             | Moderate                                               | Better long-term survival with kidney transplant                        | Critical              |
| <b>Graft loss</b>                                                                                                                                        | 1 retrospective               | 1679                | No limitations (0)                | N/A                              | Indirect (-1)                                       | Sparse (-1)          | Low                                                    | Better graft survival with short waitlist time than long waitlist time. | Critical              |
| <b>Total N</b>                                                                                                                                           |                               | 2514                |                                   |                                  |                                                     |                      |                                                        |                                                                         |                       |
| <b>Balance of Potential Benefits and Harms:</b><br>Kidney transplantation results in improved patient and graft survival than remaining on the waitlist. |                               |                     |                                   |                                  |                                                     |                      | <b>Quality of Overall Evidence:</b><br><b>Moderate</b> |                                                                         |                       |

Studies included in EP: 21546575, 25340605, 15636622, 9100052, 9573555

**Annotations:**

\* Mostly unadjusted analyses.

† Study comparison was of short vs. long waitlist time.



Table S13: Summary table  
HCV infection as predictor of  
death among kidney transplant  
recipients

| PMID     | Author   | Year | Type of article | Country   | Study design               | Registry Name              | Population          | Sample Size, Total | CKD stage, baseline | Kidney function, baseline | HCV genotypes   | Follow-up Time      | Predictor                      | Predictor Definition                                                               | Predictor units | # w/Predictor or mean (95%) | Outcome   | Outcome Definition |
|----------|----------|------|-----------------|-----------|----------------------------|----------------------------|---------------------|--------------------|---------------------|---------------------------|-----------------|---------------------|--------------------------------|------------------------------------------------------------------------------------|-----------------|-----------------------------|-----------|--------------------|
|          | Fontaine | 2013 | Abstract        | France    | Retrospective Case Control | Cristal database           | KTx                 | 25,830             | CKD 5T              |                           |                 | 15 y                | HCV+<br>HBV+ and HCV+          | nd<br>coinfection                                                                  | 983<br>76       |                             | Mortality |                    |
| 23400903 | Soliman  | 2013 | Peer-reviewed   | Egypt     | Retrospective cohort study | nd                         | KTx, HCV genotype 4 | 411                | CKD 5T              | nd                        | genotype 4 100% | 8 years             | HCV +<br>HCV -                 | HCV Ab + one year after transplantation<br>HCV Ab - one year after transplantation | 137<br>274      |                             | Mortality | nd                 |
| 25098499 | Xia      | 2014 | Peer-reviewed   | US        | Retrospective cohort study | Donor kidney mate analysis | KTx                 | 7036               | CKD 5T              |                           |                 | 10 years max        | HCV + (D-/R+)<br>HCV - (D-/R-) |                                                                                    | 3518<br>3518    |                             | Mortality |                    |
|          | Heo      | 2015 | Abstract        | US        | Retrospective cohort study | OPTN                       | KTx                 | 35,557             | CKD 5T              |                           |                 | 10 years max        | HCV +<br>HCV -                 |                                                                                    | 2024<br>33533   |                             | Mortality |                    |
| 22994610 | Ridruejo | 2010 | Peer-reviewed   | Argentina | Retrospective cohort study | none                       | KTx                 | 542                | CKD 5T              |                           |                 | Long-term (unclear) | HCV +<br>HCV -                 |                                                                                    | 180<br>362      |                             | Mortality |                    |

Table S13: Summary table  
HCV infection as predictor of  
death among kidney transplant  
recipients

| PMID     | Author   | Year | Cases (# w/Outcome) | Rate       | Adjustments (reject if none)                                                                           | Metric (HR, OR, RR, beta, change) | Estimate (95% CI)                                                  | Comparison                             | P_value            | Risk of Bias |
|----------|----------|------|---------------------|------------|--------------------------------------------------------------------------------------------------------|-----------------------------------|--------------------------------------------------------------------|----------------------------------------|--------------------|--------------|
|          | Fontaine | 2013 | 64<br>59            | nd<br>nd   | "confounding factors"                                                                                  | HR<br>HR                          | 1.8 (1.6, 2.2)<br>3.2 (1.9, 5.2)                                   | vs. HCV-<br>vs. not coinfectd          | <0.0001<br><0.0001 | LOW          |
| 23400903 | Soliman  | 2013 | 43<br>101           | 31%<br>37% | Univariate. Excluded from multivariate model (with age, diabetes, sex, HD time, HTN, CMV, proteinuria) | HR                                | 1.01 (0.97, 1.06)<br>Univariate; Excluded from multivariate model. | vs. HCV -                              | 0.5                | HIGH         |
| 25098499 | Xia      | 2014 | nd<br>nd            | nd<br>nd   | recipient risk factors                                                                                 | HR                                | 1.24 (1.06, 1.45)                                                  | vs HCV- (matched to donor kidney mate) | nd                 | LOW          |
|          | Heo      | 2015 | nd                  | nd         | not reported                                                                                           | HR                                | 1.60 (1.40, 1.82)                                                  | vs. HCV -                              | nd                 | LOW          |
| 22994610 | Ridruejo | 2010 | 46<br>48            | 26%<br>13% | age >49 y, HBsAg, cadaveric donor, pancreas transplant, IS triple therapy                              | HR                                | 1.64 (1.05, 2.55)                                                  | vs. HCV -                              | 0.027              | LOW          |

Table S13: Summary Table  
HCV infection as predictor of graft  
loss among kidney transplant  
recipients

| PMID     | Author   | Year | Type of article           | Country      | Study design               | Registry Name              | Population | Sample Size, Total | CKD stage, baseline | Kidney function, baseline | HCV genotypes | Follow-up Time | Predictor                                | Predictor Definition                                                                       | Predictor units |
|----------|----------|------|---------------------------|--------------|----------------------------|----------------------------|------------|--------------------|---------------------|---------------------------|---------------|----------------|------------------------------------------|--------------------------------------------------------------------------------------------|-----------------|
|          | Fontaine | 2013 | Abstract                  | France       | Retrospective Case Control | Cristal database           | KTx        | 25,830             |                     |                           |               | 15 y           | HCV+<br>HBV+ and HCV+                    |                                                                                            |                 |
| 16244496 | Mitwalli | 2006 | Peer-reviewed             | Saudi Arabia | Retrospective cohort study | nd                         | KTx        | 448                | CKD 5T              | nd                        | nd            | 5.85 (2.7)     | HCV +<br>HCV -                           | 2nd and 3rd generation ELISA tests for HCV Ab, Ampliclor HCV amplification kit for HCV RNA |                 |
| 26900309 | Molmenti | 2015 | Peer-reviewed publication | US           | Retrospective cohort study | UNOS                       | KTx        | 88,284             | CKD 5T              | nd, all received KTx      | nd            | nd             | HCV +<br><br>HCV -<br>HCV +<br><br>HCV - |                                                                                            |                 |
| 25098499 | Xia      | 2014 | Peer reviewed             | US           | Retrospective cohort study | Donor kidney mate analysis | KTx        | 7036               | CKD 5T              |                           |               | 10 years max   | HCV + (D-/R+)<br>HCV - (D-/R-)           |                                                                                            |                 |
|          | Heo      | 2015 | Abstract                  | US           | Retrospective cohort study | OPTN                       | KTx        | 35,557             | CKD 5T              |                           |               | 10 years max   | HCV +<br>HCV -                           |                                                                                            |                 |
|          | Kassis   | 2014 | Abstract                  | US           | Retrospective cohort study | UNOS/OPTN                  | KTx        | 61,775             | CKD 5T              |                           |               | 14 years max   | HCV +<br>HCV -                           |                                                                                            |                 |
| 22994610 | Ridruejo | 2010 | Peer-reviewed             | Argentina    | Retrospective cohort study | none                       | KTx        | 542                | CKD 5T              |                           |               | 6 months       | HCV +<br>HCV -                           |                                                                                            |                 |

Table S13: Summary Table  
HCV infection as predictor of graft loss among kidney transplant recipients

| PMID     | Author   | Year | # w/<br>Predictor or mean (95%) | Outcome                                  | Outcome Definition | Cases (# w/<br>Outcome) | Rate                                                                                                                                                                                                                                                                                                                                     | Adjustments (reject if none)                                                                                                                                                            | Metric (HR, OR, RR, beta, change) | Estimate (95% CI) | Comparison                             | P_value | Risk of Bias |
|----------|----------|------|---------------------------------|------------------------------------------|--------------------|-------------------------|------------------------------------------------------------------------------------------------------------------------------------------------------------------------------------------------------------------------------------------------------------------------------------------------------------------------------------------|-----------------------------------------------------------------------------------------------------------------------------------------------------------------------------------------|-----------------------------------|-------------------|----------------------------------------|---------|--------------|
|          | Fontaine | 2013 | 983                             | Graft loss                               | nd                 | 53                      | nd                                                                                                                                                                                                                                                                                                                                       | "confounding factors"                                                                                                                                                                   | HR                                | 1.3 (1.2, 1.6)    | vs. HCV-<br>vs. not coinfectd          | <0.0001 | LOW          |
|          |          |      | 76                              |                                          |                    | 54                      | nd                                                                                                                                                                                                                                                                                                                                       |                                                                                                                                                                                         | HR                                | 1.8 (1.2, 2.7)    |                                        |         |              |
| 16244496 | Mitwalli | 2006 | 286                             | Graft failure                            | nd                 | 119                     | 41.6%                                                                                                                                                                                                                                                                                                                                    | age, sex, type of donor, hypertension                                                                                                                                                   | HR                                | 4.37 (1.81, 4.77) | vs. HCV -                              | nd      | LOW          |
|          |          |      | 162                             |                                          |                    | 106                     | 65.4%                                                                                                                                                                                                                                                                                                                                    |                                                                                                                                                                                         |                                   |                   |                                        |         |              |
| 26900309 | Molmenti | 2015 | 799                             | graft failure (live donor recipient)     | nd                 | nd                      | nd                                                                                                                                                                                                                                                                                                                                       | donor age, donor BMI, donor gender, donor ethnicity, HLA mismatch level, donor preoperative creatinine, and donor hepatitis C antibodyrecipient drug-treated hypertension and Hep B SAg | HR                                | 1.56 (1.33, 1.83) | vs. HCV-                               | <0.05   | LOW          |
|          |          |      | 23,544                          | graft failure (deceased donor recipient) | nd                 | nd                      | donor age, donor BMI, donor gender, donor ethnicity, HLA mismatch level, donor terminal laboratory creatinine, donor hepatitis C antibody, donor history of diabetes, donor history of hypertension, donor cause of death, and donor cardiac arrest postbrain death, recipient drug-treated hypertension and hepatitis B surface antigen |                                                                                                                                                                                         |                                   |                   |                                        |         |              |
|          |          |      | 4076<br>49241                   | nd                                       | nd<br>nd           | nd<br>nd                |                                                                                                                                                                                                                                                                                                                                          |                                                                                                                                                                                         |                                   |                   |                                        |         |              |
| 25098499 | Xia      | 2014 | 3518                            | Graft loss                               | nd                 | nd                      | nd                                                                                                                                                                                                                                                                                                                                       | recipient risk factors                                                                                                                                                                  | HR                                | 1.24 (1.04, 1.47) | vs HCV- (matched to donor kidney mate) | nd      | LOW          |
|          |          |      | 3518                            |                                          |                    | nd                      | nd                                                                                                                                                                                                                                                                                                                                       |                                                                                                                                                                                         |                                   |                   |                                        |         |              |
|          | Heo      | 2015 | 2024<br>33533                   | Graft failure                            | nd                 | nd                      | nd                                                                                                                                                                                                                                                                                                                                       | not reported                                                                                                                                                                            | HR                                | 1.32 (1.15, 1.52) | vs. HCV -                              | nd      | LOW          |
|          | Kassis   | 2014 | 3334<br>58441                   | Graft failure                            | nd                 | nd                      | nd                                                                                                                                                                                                                                                                                                                                       | not reported                                                                                                                                                                            | HR                                | 1.34 (1.31, 1.37) | vs. HCV-                               | <0.001  |              |
| 22994610 | Ridruejo | 2010 | 180                             | Graft failure                            | nd                 | 36                      | 20%                                                                                                                                                                                                                                                                                                                                      | age >49 y, cadaveric donor, IS triple therapy                                                                                                                                           | HR                                | 2.65 (1.19, 3.23) | vs. HCV -                              | 0.008   | LOW          |
|          |          |      | 362                             |                                          |                    | 31                      | 9%                                                                                                                                                                                                                                                                                                                                       |                                                                                                                                                                                         |                                   |                   |                                        |         |              |

**Table S14: Evidence profile: HCV infection as predictor of death and graft loss among kidney transplant recipients**

| Outcome    | # of Studies and Study Design | Total N of Participants | Methodological Quality of Studies | Consistency Across Studies       | Directness of the Evidence, including Applicability | Other Considerations | Summary of Findings             |                                                                                                                                                                                                                                                                                                                               |                       |
|------------|-------------------------------|-------------------------|-----------------------------------|----------------------------------|-----------------------------------------------------|----------------------|---------------------------------|-------------------------------------------------------------------------------------------------------------------------------------------------------------------------------------------------------------------------------------------------------------------------------------------------------------------------------|-----------------------|
|            |                               |                         |                                   |                                  |                                                     |                      | Quality of Evidence for Outcome | Description of Findings                                                                                                                                                                                                                                                                                                       | Importance of Outcome |
| Death      | 5 retrospective cohorts       | Cohorts: 411-35,557     | No limitations (0)                | No important inconsistencies (0) | Direct (0)                                          | None                 | High                            | 4 of 5 studies found significant association between HCV+ status and mortality among KTx recipients (HR 1.01-1.8). The study with a nonsignificant finding was restricted to HCV genotype 4 (in Egypt).<br>1 study found that HCV/HBV coinfection was associated with a higher death rate (HR 3.2).                           | Critical              |
| Graft Loss | 7 retrospective cohorts       | Cohorts: 448-61,775     | No limitations (0)                | No important inconsistencies (0) | Direct (0)                                          | None                 | High                            | All 7 studies found statistically significant associations between HCV+ status and increased risk of graft loss (ES 1.3-4.37).<br>1 study found similarly increased risk in patients with live or deceased donor kidneys.<br>1 study found that HCV/HBV coinfection was associated with a higher rate of graft loss (HR 1.8). | Critical              |
| Total N    | 8 retrospective cohorts       | Cohorts: 411-61,775     |                                   |                                  |                                                     |                      |                                 |                                                                                                                                                                                                                                                                                                                               |                       |

**Association of HCV+ status and CKD:**

Kidney transplant recipients with HCV infection are at higher risk of death and graft loss than similar patients without HCV.

**Quality of Overall Evidence:**

High

**Studies included in EP:** 23400903, 16244496, 26900309, 25098499, 22994610, AASLD-850 2013, ATC Abstracts 2015, Kassis 2014

**Abbreviations:** CKD: chronic kidney disease; DAA: direct-acting antivirals; GFR: glomerular filtration rate; RCT: randomized controlled trial; SVR: sustained virological response



| PMID          | Author            | Year | Publication | Study design        | Database                            | Sample size | CKD stage | Kidney function | HCV+                            | HCV genotype | Outcome                | Arm                                                                            |
|---------------|-------------------|------|-------------|---------------------|-------------------------------------|-------------|-----------|-----------------|---------------------------------|--------------|------------------------|--------------------------------------------------------------------------------|
| 20977636      | Morales JM et al. | 2010 | Journal     | nRCS, prospective   | Madrid/Barcelona transplant centers | 545         | nd        | nd              | 34.6% donors<br>100% recipients |              | Death                  | D+/R+<br>D-/R+<br>D+/R-<br>D-/R-                                               |
|               |                   |      |             |                     |                                     |             |           |                 |                                 |              | Graft loss             | D-/R+<br>D+/R+<br>D-/R+                                                        |
|               |                   |      |             |                     |                                     |             |           |                 |                                 |              | Acute rejection        | D+/R+<br>D-/R+                                                                 |
|               |                   |      |             |                     |                                     |             |           |                 |                                 |              | Delayed graft function | D+/R+<br>D-/R+                                                                 |
| ATC 2015 1678 | Myint T et al     | 2015 | Abstract    | nRCS, retrospective | SRTR                                | 12,841      | nd        | nd              | 100% donors                     | nd           | Death                  | D+/R+ ≤50 yo<br>D-/R+ ≤50 yo<br>D+/R+ >50 yo<br>D-/R+ >50 yo<br>D+/R-<br>D-/R- |
| 25340605      | Scalea JR et al   | 2015 | Journal     | nRCS, retrospective | Baltimore transplant center         | 1679        | nd        | nd              | nd                              | nd           | Death                  | D+/R+<br>D-/R+<br>D-/R-                                                        |
|               |                   |      |             |                     |                                     |             |           |                 |                                 |              | Graft loss             | D+/R+<br>D-/R+<br>D-/R-                                                        |

**Table S15: Summary Table**  
**Clinical outcomes of HCV-positive kidney**  
**transplant recipients from HCV-positive donors**  
**Categorical outcomes**

| PMID           | Author                                                | Year | Timepoint        | Frequency/Rate                                                                                                       | Relative effect                                     | p-value                            | Quality | Notes                                        |
|----------------|-------------------------------------------------------|------|------------------|----------------------------------------------------------------------------------------------------------------------|-----------------------------------------------------|------------------------------------|---------|----------------------------------------------|
| ATC 2013 C1264 | Jawa P et al                                          | 2013 | 1 year           | <b>7/106 (6.7%)</b>                                                                                                  | nd                                                  | <b>&gt;0.05 (overall)</b>          |         | Time since transplant, not waitlist          |
|                |                                                       |      | 3 years          | 9/57 (16%)<br><b>25/106 (24%)</b><br>15/57 (26%)                                                                     |                                                     | nd                                 |         |                                              |
|                |                                                       |      | 5 years          | <b>43/106 (41%)</b><br>23/57 (41%)                                                                                   |                                                     | nd                                 |         |                                              |
|                |                                                       |      | 1 year           | <b>4/102 (3.9%)</b><br>6/57 (11%)                                                                                    | nd                                                  | <b>&gt;0.05 (overall)</b>          |         |                                              |
|                |                                                       |      | 3 years          | <b>21/106 (20%)</b><br>11/57 (19%)                                                                                   |                                                     | nd                                 |         |                                              |
|                |                                                       |      | 5 years          | <b>41/106 (39%)</b><br>14/57 (24%)                                                                                   |                                                     | nd                                 |         |                                              |
|                |                                                       |      | 5 years          | <b>nd/692 (31%)</b>                                                                                                  | nd                                                  | <b>&lt;0.001</b>                   |         |                                              |
| 5 years        | nd/1149 (25%)<br><b>nd/692 (53%)</b><br>nd/1149 (37%) | nd   | <b>&lt;0.001</b> |                                                                                                                      |                                                     |                                    |         |                                              |
| 20353475       | Kucirka LM et al.                                     | 2010 | nd               | <b>613/1804 (34.0%) [smaller subset]</b>                                                                             | <b>adjHR 1.29 (1.15, 1.45)</b>                      | <b>&lt;0.001</b>                   |         | Adjusted for wait time                       |
| 22560841       | Kucirka LM et al.                                     | 2012 | nd               | 1467/4446 (33.0%) [smaller subset]<br><b>774/1804 (42.9%) [smaller subset]</b><br>1881/4446 (42.3%) [smaller subset] | <b>adjHR 1.18 (1.04, 1.32)</b>                      | <b>0.007</b>                       |         |                                              |
| 22283142       | Singh N et al.                                        | 2012 | 6.0 years (mean) | <b>38/95 (40%) (52% per survival curve)</b>                                                                          | <b>adjHR 2.1 (1.4, 2.9)</b>                         | <b>&lt;0.01</b>                    |         | Multivariate, but not adjusted for wait time |
|                |                                                       |      | 6.0 years (mean) | 13/59 (22%) (30% per survival curve)<br><b>93/118 (79%) (77% per survival curve)</b>                                 | NS (no further data)<br><b>adjHR 2.5 (1.9, 3.2)</b> | NS<br><b>&lt;0.01</b>              |         |                                              |
|                |                                                       |      | 6.0 years (mean) | 446/1897 (24%) (35% per survival curve)<br><b>63/95 (66%) (77% per survival curve)</b>                               | REF<br><b>adjHR 1.8 (1.4, 2.5)</b>                  | <b>&lt;0.01</b>                    |         |                                              |
|                |                                                       |      | 6.0 years (mean) | 36/59 (61%) (76% per survival curve)<br><b>103/108 (87%) (84% per survival curve)</b>                                | adjHR 2.0 (1.4, 2.8)<br><b>adjHR 2.1 (1.6, 2.6)</b> | <b>&lt;0.01</b><br><b>&lt;0.01</b> |         |                                              |
|                |                                                       |      | 6.0 years (mean) | 723/1897 (38%) (52% per survival curve)                                                                              | REF                                                 |                                    |         |                                              |



| PMID          | Author            | Year | Timepoint        | Frequency/Rate        | Relative effect                                              | p-value | Quality | Notes                            |
|---------------|-------------------|------|------------------|-----------------------|--------------------------------------------------------------|---------|---------|----------------------------------|
|               |                   |      | 6.0 years (mean) | 61%                   | NS (no further data)                                         | NS      |         |                                  |
|               |                   |      |                  | 72%                   | adjHR 1.9 (1.4, 2.7)                                         | <0.05   |         |                                  |
|               |                   |      |                  | 53%                   | NS (no further data)                                         | NS      |         |                                  |
|               |                   |      |                  | 44%                   | REF                                                          |         |         |                                  |
| 20977636      | Morales JM et al. | 2010 | 6.2 years (mean) | 33/162 (20%)          | OR 0.71 (0.41, 1.22)                                         | 0.22    |         | Time on dialysis tested, NS      |
|               |                   |      |                  | 53/306 (17%)          |                                                              |         |         |                                  |
|               |                   |      | 6.2 years (mean) | 68/162 (42%)          | 1.25 (0.90, 1.73)                                            | 0.18    |         |                                  |
|               |                   |      |                  | 112/306 (37%)         |                                                              |         |         |                                  |
|               |                   |      | 6.2 years (mean) | nd/162 (42%)          | nd                                                           | 0.57    |         |                                  |
|               |                   |      |                  | nd/306 (37%)          |                                                              |         |         |                                  |
|               |                   |      | 6.2 years (mean) | nd/162 (54%)          | nd                                                           | 0.26    |         |                                  |
|               |                   |      |                  | nd/306 (48%)          |                                                              |         |         |                                  |
| ATC 2015 1678 | Myint T et al     | 2015 | nd               | nd                    | adjHR 0.88 (0.72, 1.08)<br>vs. waitlist w/o Txp<br>(implied) | NS      |         | Comparison with waitlist w/o Txp |
|               |                   |      |                  | nd                    | adjHR 0.69 (0.53, 0.90)                                      | <0.05   |         |                                  |
|               |                   |      |                  | nd                    | adjHR 0.66 (0.57, 0.77)                                      | <0.05   |         |                                  |
|               |                   |      |                  | nd                    | adjHR 0.67 (0.55, 0.81)                                      | <0.05   |         |                                  |
|               |                   |      |                  | nd                    | adjHR 1.13 (0.92, 1.40)                                      | NS      |         |                                  |
|               |                   |      |                  | nd                    | adjHR 0.55 (0.50, 0.60)                                      | <0.05   |         |                                  |
| 25340605      | Scalea JR et al   | 2015 | 7.8 years (mean) | nd/195 (51% 10 year)  | nd                                                           | nd      |         | multivariate                     |
|               |                   |      |                  | nd/66 (59% 10 year)   | nd                                                           | nd      |         |                                  |
|               |                   |      |                  | nd/1418 (46% 10 year) | nd                                                           | nd      |         |                                  |
|               |                   |      | 7.8 years (mean) | nd/195 (53% 10 year)  | 0.78 (0.57, 1.08)                                            | 0.10    |         |                                  |
|               |                   |      |                  | nd/66 (72% 10 year)   | 1.67 (1.10, 2.52)                                            | 0.02    |         |                                  |
|               |                   |      |                  | nd/1418 (64% 10 year) | REF                                                          |         |         |                                  |

**Table S15: Summary Table**  
**Clinical outcomes of HCV-positive kidney**  
**transplant recipients from HCV-positive donors**  
**Continuous outcomes**

| PMID          | Author             | Year | Publication | Study design        | Database                           | Sample size | CKD stage | Kidney function | HCV+                          | HCV genotype | Outcome          | Definition        | Arm                                     |
|---------------|--------------------|------|-------------|---------------------|------------------------------------|-------------|-----------|-----------------|-------------------------------|--------------|------------------|-------------------|-----------------------------------------|
| 22283142      | Singh N et al.     | 2012 | Journal     | nRCS, retrospective | UWisconsin<br>Abdominal Transplant | 2169        | nd        | nd              | 7.1% donors                   | nd           | Patient survival | median in years   | D+/R+<br><br>D+/R-<br>D-/R+<br>D-/R-    |
|               |                    |      |             |                     |                                    |             |           |                 |                               |              | Graft survival   | median in years   | D+/R+<br>D+/R-<br>D-/R+<br>D-/R-        |
| 25340605      | Scalea JR et al.   | 2015 | Journal     | nRCS, retrospective | Baltimore<br>transplant center     | 1679        | nd        | nd              | nd                            | nd           | Waitlist time    | mean (SD) in days | HCV+ donors<br><br>HCV- donors<br>D-/R- |
| AST 2015 P-53 | Limkemann A et al. | 2015 | Abstract    | nRCS, retrospective | OPTN                               | 1841        | nd        | nd              | 37.6% donors<br>0% recipients | nd           | Waitlist time    | mean (SD) in days | D+/R-<br><br>D-/R-                      |

**Table S15: Summary Table**  
**Clinical outcomes of HCV-positive kidney**  
**transplant recipients from HCV-positive donors**  
**Continuous outcomes**

| PMID          | Author             | Year | N    | Timepoint | Value      | Change | p-value | Quality |
|---------------|--------------------|------|------|-----------|------------|--------|---------|---------|
| 22283142      | Singh N et al.     | 2012 | 25   | 10 years  | 5.3        | nd     | nd      | Good    |
|               |                    |      | 23   |           | 9.3        | nd     | nd      |         |
|               |                    |      | 15   |           | 15.5       | nd     | nd      |         |
|               |                    |      | 362  |           | 16         | nd     | nd      |         |
|               |                    |      | 11   | 10 years  | 4.4        | nd     | nd      |         |
|               |                    |      | 17   |           | 5.2        | nd     | nd      |         |
|               |                    |      | 5    |           | 4.8        | nd     | nd      |         |
| 290           |                    | 9.5  | nd   | nd        |            |        |         |         |
| 25340605      | Scalea JR et al.   | 2015 | 195  | Txp       | 318 (458)  | nd     | nd      | Good    |
|               |                    |      | 66   |           | 570 (838)  | nd     | nd      |         |
|               |                    |      | 1418 |           | 613 (819)  | nd     | nd      |         |
| AST 2015 P-53 | Limkemann A et al. | 2015 | 692  | Txp       | 450 (461)  |        | <0.001  | Fair    |
|               |                    |      | 1149 |           | 1490 (880) |        |         |         |

**Table S16: Summary Table**  
**Induction and immunosuppression in kidney transplant recipients with HCV infection**  
**Categorical outcomes**

| PMID           | Author                                    | Year | Publication | Study design        | Sample size | CKD Stage | Kidney function | Viral HCV RNA | HCV genotype | Outcome                          | Definition            |
|----------------|-------------------------------------------|------|-------------|---------------------|-------------|-----------|-----------------|---------------|--------------|----------------------------------|-----------------------|
| 18551066       | <b>Luan FL et al. (Immunosuppression)</b> | 2008 | Journal     | nRCS, retrospective | 3708        | KTR       | nd              | nd            | nd           | <b>Death</b>                     | <b>Death</b>          |
| 18551066       | <b>Luan FL et al. (Induction)</b>         | 2008 | Journal     | nRCS, retrospective | 3708        | KTR       | nd              | nd            | nd           | <b>Death</b>                     | <b>nd</b>             |
|                |                                           |      |             |                     |             |           |                 |               |              | <b>Kidney Graft Failure/Loss</b> | <b>nd</b>             |
| ATC 2012 1001  | <b>Sureshkumar KK et al.</b>              | 2012 | Abstract    | nRCS, retrospective | 1676        | KTR       | nd              | nd            | nd           | <b>Death</b>                     | <b>Survival</b>       |
|                |                                           |      |             |                     |             |           |                 |               |              | <b>Kidney Graft Failure/Loss</b> | <b>Graft Survival</b> |
| ATC 2013 B1097 | <b>Aull M et al.</b>                      | 2013 | Abstract    | nRCS, retrospective | 634         | KTR       | nd              | nd            | nd           | <b>Kidney Graft Failure/Loss</b> | <b>Graft Survival</b> |

| PMID              | Author           | Year | Publication | Study design        | Sample size | CKD Stage | Kidney function | Viral HCV RNA | HCV genotype | Outcome                   | Definition     |
|-------------------|------------------|------|-------------|---------------------|-------------|-----------|-----------------|---------------|--------------|---------------------------|----------------|
| ATC 2013 oral 179 | Linatoc J et al. | 2013 | Abstract    | nRCS, retrospective | 79          | KTR       | nd              | nd            | nd           | Death                     | Survival       |
|                   |                  |      |             |                     |             |           |                 |               |              | Kidney Graft Failure/Loss | Graft Survival |

**Table S16: Summary Table**  
**Induction and immunosuppression in kidney transplant recipients with HCV infection**  
**Categorical outcomes**

| PMID           | Author                             | Year | Arm                                                               | Dose | Duration | Timepoint | Frequency/Rate | Relative effect          | p-value |
|----------------|------------------------------------|------|-------------------------------------------------------------------|------|----------|-----------|----------------|--------------------------|---------|
| 18551066       | Luan FL et al. (Immunosuppression) | 2008 | tacrolimus                                                        | nd   | nd       | nd        | nd             | adj HR 1.03 (0.79, 1.35) | 0.83    |
|                |                                    |      | cyclosporin A                                                     | nd   | nd       | nd        | nd             | adj HR 1.12 (0.88, 1.44) | 0.37    |
|                |                                    |      | mycophenolate mofetil                                             | nd   | nd       | nd        | nd             | adj HR 0.77 (0.64, 0.92) | 0.005   |
|                |                                    |      | sirolimus/everolimus                                              | nd   | nd       | nd        | nd             | adj HR 1.13 (0.83, 1.55) | 0.43    |
|                |                                    |      | steroid                                                           | nd   | nd       | nd        | nd             | adj HR 1.16 (0.79, 1.71) | 0.44    |
|                |                                    |      | no immunosuppression                                              | nd   | nd       | nd        | nd             |                          |         |
| 18551066       | Luan FL et al. (Induction)         | 2008 | depleting antibodies                                              | nd   | nd       | nd        | nd             | adj HR 0.75 (0.61, 0.90) | 0.003   |
|                |                                    |      | nondepleting antibodies                                           | nd   | nd       | nd        | nd             | adj HR 0.82 (0.69, 0.98) | 0.03    |
|                |                                    |      | no immunosuppression                                              | nd   | nd       | nd        | nd             | adj HR 0.79 (0.64, 0.98) | 0.03    |
|                |                                    |      | no induction                                                      | nd   | nd       | nd        | nd             |                          |         |
|                |                                    |      | depleting antibodies                                              | nd   | nd       | nd        | nd             | adj HR 1.14 (0.92, 1.42) | 0.42    |
| ATC 2012 1001  | Sureshkumar KK et al.              | 2012 | rabbit-antithymocyte globulin or alemtuzumab                      | nd   | nd       | nd        | nd             | HR 1.00 (0.76, 1.33)     | 0.97    |
|                |                                    |      | basiliximab or daclizumab                                         | nd   | nd       | nd        | nd             |                          |         |
|                |                                    |      | rabbit-antithymocyte globulin or alemtuzumab                      | nd   | nd       | nd        | nd             | HR 1.12 (0.93, 1.36)     | 0.24    |
|                |                                    |      | basiliximab or daclizumab                                         | nd   | nd       | nd        | nd             |                          |         |
| ATC 2013 B1097 | Aull M et al.                      | 2013 | rATG induction + tacrolimus + mycophenolate + rapid steroid taper | nd   | nd       | 234 weeks | 22/31 (72%)    |                          |         |

| PMID                 | Author           | Year      | Arm                  | Dose                 | Duration  | Timepoint        | Frequency/Rate       | Relative effect | p-value      |
|----------------------|------------------|-----------|----------------------|----------------------|-----------|------------------|----------------------|-----------------|--------------|
| ATC 2013 oral 179    | Linatoc J et al. | 2013      | <b>thymoglobulin</b> | <b>nd</b>            | <b>nd</b> | <b>52 weeks</b>  | <b>34/40 (85%)</b>   | <b>nd</b>       | <b>nd</b>    |
|                      |                  |           | no induction         | nd                   | nd        | 52 weeks         | 37/39 (94.9%)        |                 |              |
|                      |                  |           | <b>thymoglobulin</b> | <b>nd</b>            | <b>nd</b> | <b>156 weeks</b> | <b>28/40 (69.7%)</b> | <b>nd</b>       | <b>nd</b>    |
|                      |                  |           | no induction         | nd                   | nd        | 156 weeks        | 32/39 (82.1%)        |                 |              |
|                      |                  |           | <b>thymoglobulin</b> | <b>nd</b>            | <b>nd</b> | <b>260 weeks</b> | <b>25/40 (61.7%)</b> | <b>nd</b>       | <b>0.005</b> |
|                      |                  |           | no induction         | nd                   | nd        | 260 weeks        | 32/39 (79.5%)        |                 |              |
|                      |                  |           | <b>thymoglobulin</b> | <b>nd</b>            | <b>nd</b> | <b>52 weeks</b>  | <b>36/40 (92%)</b>   | <b>nd</b>       | <b>nd</b>    |
|                      |                  |           | no induction         | nd                   | nd        | 52 weeks         | 37/39 (94.7%)        |                 |              |
|                      |                  |           | <b>thymoglobulin</b> | <b>nd</b>            | <b>nd</b> | <b>156 weeks</b> | <b>33/40 (83.3%)</b> | <b>nd</b>       | <b>nd</b>    |
|                      |                  |           | no induction         | nd                   | nd        | 156 weeks        | 31/39 (80.4%)        |                 |              |
| <b>thymoglobulin</b> | <b>nd</b>        | <b>nd</b> | <b>260 weeks</b>     | <b>23/40 (58.1%)</b> | <b>nd</b> | <b>0.005</b>     |                      |                 |              |
| no induction         | nd               | nd        | 260 weeks            | 30/39 (77.4%)        |           |                  |                      |                 |              |

Table S17: Summary Table  
HCV treatment of HCV-associated glomerular disease  
Categorical outcomes

| PMID                    | Author                                                                                                                                                                                                                                                                                                                                                                                                                                                                                                                                                                                                                                                                       | Year       | Type of article           | Study design                       | Sample size | CKD stage                                                                                                                                                                                           | Kidney function                                                                                                      | GN description                                                                                                                                                            | Viral HCV RNA                                              | HCV genotype                                     | Outcome                                                                                                                                                                                                                         |
|-------------------------|------------------------------------------------------------------------------------------------------------------------------------------------------------------------------------------------------------------------------------------------------------------------------------------------------------------------------------------------------------------------------------------------------------------------------------------------------------------------------------------------------------------------------------------------------------------------------------------------------------------------------------------------------------------------------|------------|---------------------------|------------------------------------|-------------|-----------------------------------------------------------------------------------------------------------------------------------------------------------------------------------------------------|----------------------------------------------------------------------------------------------------------------------|---------------------------------------------------------------------------------------------------------------------------------------------------------------------------|------------------------------------------------------------|--------------------------------------------------|---------------------------------------------------------------------------------------------------------------------------------------------------------------------------------------------------------------------------------|
| 18711294                | Abbas G., Hussain S., Shafi T.                                                                                                                                                                                                                                                                                                                                                                                                                                                                                                                                                                                                                                               | 2008       | Peer-reviewed publication | Single arm (cohort), unclear       | 30          | nd                                                                                                                                                                                                  | Scr: 1.44 mg/dL (range 0.70, 4.60); proteinuria: 4.83 g (range 1.60, 9.07)                                           | Membranoproliferative glomerulonephritis in 25/30 (83%), membranous glomerulonephritis (MGN) in 3/30 (10%), mesangioproliferative glomerulonephritis (MesGN) in 2/30 (7%) | nd                                                         | 3: 100%                                          | <b>SVR24</b>                                                                                                                                                                                                                    |
| 26567178, ILC 2015 LP08 | Saadoun D., Thibault V., Si Ahmed SN., Alric L., Mallet M., Guillaud C., Izzedine H., Plaisier A., Fontaine H., Costopoulos M., Le Garff-Tavernier M., Hezode C., Poi S., Musset L., Poynard T., Cacoub P.                                                                                                                                                                                                                                                                                                                                                                                                                                                                   | 2015       | Peer-reviewed publication | Single arm (cohort), prospective   | 24          | CKD 1-3                                                                                                                                                                                             | GFR: median 77.3 mL/min/1.73m <sup>2</sup> (44-90); SCR: median 89 μmol/L (80-163); proteinuria: 1.09 g/d (0.6, 2.4) | HCV-cryoglobulinemia vasculitis; 5 (21%) patients had renal involvement                                                                                                   | 5.9 log <sub>10</sub> IU/mL (4.5-6.3)                      | 1a: 25%; 1b: 25%; 2: 8%; 3: 25%; 4: 13%; 5: 4%   | <b>Death</b><br><br><a href="#">Discontinuation due to AEs</a><br><a href="#">Relapse (viral)</a><br><a href="#">SVR12</a><br><b>Serious AEs</b><br><a href="#">Relapse (viral)</a>                                             |
| EULAR 2013 OPO212       | Roccatello D., Sciascia S., Baldovino S., Rossi D.                                                                                                                                                                                                                                                                                                                                                                                                                                                                                                                                                                                                                           | 2012       | Abstract                  | Single arm (cohort), prospective   | 27          | Type II mixed cryoglobulinemia syndrome with manifestations, including renal involvement (diffuse membranoproliferative glomerulonephritis in 15 cases), peripheral neuropathy (26 cases) and large | Scr: 2.2 (1.9); proteinuria: 2.3 (2.1)                                                                               | Diffuse membranoproliferative glomerulonephritis (15 cases), peripheral neuropathy (26 cases), large skin ulcers (9 case, in 7 necrotizing)                               | nd                                                         | nd                                               | <b>Serious AEs</b><br><a href="#">Relapse (viral)</a>                                                                                                                                                                           |
| 22147661; 26255249      | De Vita S., Quartuccio L., Isola M., Mazza C., Scaini P., Lenzi M., Campanini M., Naclerio C., Tavoni A., Pietrogrande M., Ferri C., Mascia MT., Masolini P., Zabotti A., Maset M., Roccatello D., Zignego AL, Pioltelli P., Gabrielli A., Filippini D., Perrella O., Migliaresi S., Galli M., Bombardieri S., Monti G.; Quartuccio L., Zuliani F., Corazza L., Scaini P., Zani R., Lenzi M., Tavoni A., Sebastiani M., Baldovino S., Urraro T., Saccardo F., Sbreglia C., Mazza C., Pioltelli P., Fraticelli P., Filippini D., Gabrielli A., Perrella O., Scarpato S., Roccatello D., Zignego AL, Ferri C., Bombardieri S., Pietrogrande M., Monti G., Galli M., De Vita S. | 2012; 2015 | Peer-reviewed publication | RCT                                | 59          | CKD 1-3                                                                                                                                                                                             | Scr: 1.4 mg/dL (range 0.7, 2.8); Proteinuria: 2.0 g/24h (range 0.6, 7.9)                                             | Severe cryoglobulinemic vasculitis                                                                                                                                        | nd                                                         | nd                                               | <b>Death</b><br><br><a href="#">Discontinuation due to AEs</a><br><b>Discontinuation</b><br><br><a href="#">Relapse</a><br><b>Serious AEs</b>                                                                                   |
| 26474537                | Sise ME., Bloom AK., Wisocky J., Lin MV., Gustafson JL., Lundquist AL., Steele D., Thim M., Williams WW., Hashemi N., Kim AY., Thadhani R., Chung RT.                                                                                                                                                                                                                                                                                                                                                                                                                                                                                                                        | 2016       | Peer-reviewed publication | nRCS, retrospective                | 22          | CKD 1-2: 58%; CKD 3A: 25%; CKD 3B: 8%; CKD 4-5: 8%                                                                                                                                                  | GFR: 79 mL/min/1.73m <sup>2</sup> (range 43, 115); SCR: 0.97 mg/dL (0.70, 2.47)                                      | Mixed cryoglobulinemia                                                                                                                                                    | nd                                                         | 1a: 45.5%; 1b: 13.6%; 2: 18.2%; 3: 9.1%; 4: 4.5% | <b>SVR12</b><br><br><a href="#">Discontinuation due to AEs</a><br><br><a href="#">Relapse (viral)</a><br><br><b>Serious AEs</b>                                                                                                 |
| 22147444                | Sneller MC., Hu Z., Langford CA.                                                                                                                                                                                                                                                                                                                                                                                                                                                                                                                                                                                                                                             | 2012       | Peer-reviewed publication | RCT                                | 24          | CKD 1-3                                                                                                                                                                                             | CrCl: >30 mL/min                                                                                                     | Hepatitis C-associated cryoglobulinemic vasculitis                                                                                                                        | median 5.50 log <sub>10</sub> copies/mL                    | 1: 83.3%; 2: 16.7%                               | <a href="#">Relapse</a><br><br><b>Serious AEs</b>                                                                                                                                                                               |
| 25890508                | Mazzaro C., Panarello G., Mauro E., Gattei V., Pozzato G.                                                                                                                                                                                                                                                                                                                                                                                                                                                                                                                                                                                                                    | 2015       | Peer-reviewed publication | Single arm (cohort), retrospective | 10          | CKD 3                                                                                                                                                                                               | CrCl: 47 (10) mL/min; SCR: 1.6 (0.3) mg/mL; Proteinuria: 4.0 (0.7) g/24h                                             | HCV-positive cryoglobulinemic glomerulonephritis.                                                                                                                         | 15.0 x 10 <sup>6</sup> copies/mL (17.5 x 10 <sup>6</sup> ) | 1b: 50%; 2: 20%; 3: 30%                          | <b>SVR</b><br><br><a href="#">Discontinuation due to AEs</a><br><a href="#">Relapse (viral)</a>                                                                                                                                 |
| 17075881                | Saadoun D., Resche-Rigon M., Thibault V., Piette JC., Cacoub P.                                                                                                                                                                                                                                                                                                                                                                                                                                                                                                                                                                                                              | 2006       | Peer-reviewed publication | Single arm (cohort), prospective   | 72          | nd                                                                                                                                                                                                  | GFR ≤70: 22%                                                                                                         | Mixed cryoglobulinemia vasculitis                                                                                                                                         | 5.87 (0.65) log copies/mL                                  | 1: 61.1%                                         | <b>Early SVR</b><br><br><br><br><br><br><br><br><br><br><b>SVR26</b><br><br><br><br><br><br><br><br><br><br><b>SVR0</b><br><b>SVR total</b><br><b>Death</b><br><a href="#">Discontinuation due to AEs</a><br><b>Serious AEs</b> |
| 22153224                | Mazzaro                                                                                                                                                                                                                                                                                                                                                                                                                                                                                                                                                                                                                                                                      | 2011       | Peer-reviewed publication | Single arm (cohort), retrospective | 86          | nd                                                                                                                                                                                                  | nd                                                                                                                   | Mixed cryoglobulinemia vasculitis                                                                                                                                         | nd                                                         | 1a: 7%; 1b: 42%; 2: 39%; 3: 11%; 4: 1%           | <b>SVR</b><br><b>Relapse (viral)</b><br><a href="#">Discontinuation due to AEs</a>                                                                                                                                              |



| PMID     | Author  | Year | Type of article           | Study design                     | Sample size | CKD stage    | Kidney function                                           | GN description                    | Viral HCV RNA                       | HCV genotype                                     | Outcome                                                                                               |
|----------|---------|------|---------------------------|----------------------------------|-------------|--------------|-----------------------------------------------------------|-----------------------------------|-------------------------------------|--------------------------------------------------|-------------------------------------------------------------------------------------------------------|
| 26853322 | Gragani | 2016 | Peer-reviewed publication | Single arm (cohort), prospective | 17          | CKD 3: 17.6% | CrCl: 100.0 (39.6) ml/min, Proteinuria: 13.8 (29.0) mg/dl | Mixed cryoglobulinemia vasculitis | 1.77 (1.85) x 10 <sup>6</sup> IU/ml | 1a: 12%, 1b: 65%, 2: 6%, 3: 17%                  | Serious AEs                                                                                           |
| 27483451 | Gragani | 2016 | Peer-reviewed publication | nRCS, prospective                | 44          | nd           | nd                                                        | Mixed cryoglobulinemia            | 2.9 (3.6) IU/mL x 10 <sup>6</sup>   | 1a: 4.5%; 1b: 47.7%, 2: 29.5%; 3: 11.3%, 4: 6.8% | <a href="#">SVR12</a><br><a href="#">SVR24</a><br><a href="#">SVR4</a><br>Discontinuations due to AEs |

Table S17: Summary Table  
HCV treatment of HCV-associated glomerular disease  
Categorical outcomes

| PMID                    | Author                                                                                                                                                                                                                                                                                                                                                                                                                                                                                                                                                                                                                                                                       | Year       | Definition                                                                                                                                                                                                                                                                | Arm                                                                                                    | Dose                                                                                              | Timepoint                                                                                                               | Duration                                                         | Frequency/Rate                                    | Relative effect | p-value | Quality |
|-------------------------|------------------------------------------------------------------------------------------------------------------------------------------------------------------------------------------------------------------------------------------------------------------------------------------------------------------------------------------------------------------------------------------------------------------------------------------------------------------------------------------------------------------------------------------------------------------------------------------------------------------------------------------------------------------------------|------------|---------------------------------------------------------------------------------------------------------------------------------------------------------------------------------------------------------------------------------------------------------------------------|--------------------------------------------------------------------------------------------------------|---------------------------------------------------------------------------------------------------|-------------------------------------------------------------------------------------------------------------------------|------------------------------------------------------------------|---------------------------------------------------|-----------------|---------|---------|
| 18711294                | Abbas G., Hussain S., Shafi T.                                                                                                                                                                                                                                                                                                                                                                                                                                                                                                                                                                                                                                               | 2008       | nd                                                                                                                                                                                                                                                                        | IFN + RBV                                                                                              | 3 MU TIW + 200-1000 mg OD                                                                         | 24 weeks                                                                                                                | ≥6 months                                                        | 4/8 (50%)                                         |                 |         | Poor    |
| 26567178, ILC 2015 LP08 | Saadoun D., Thibault V., Si Ahmed SN., Alric L., Mallet M., Guillaud C., Izzedine H., Plaisier A., Fontaine H., Costopoulos M., Le Garff-Tavernier M., Hezode C., Poi S., Musset L., Poynard T., Cacoub P.                                                                                                                                                                                                                                                                                                                                                                                                                                                                   | 2015       | severe anemia                                                                                                                                                                                                                                                             | sofosbuvir + ribavirin                                                                                 | 400 mg OD + 200-1400 mg OD                                                                        | 24 weeks                                                                                                                | 24 weeks                                                         | 7/27 (26%)<br>2/24 (8%)                           |                 |         | Good    |
| EULAR 2013 OPO212       | Roccatello D., Sciascia S., Baldovino S., Rossi D.                                                                                                                                                                                                                                                                                                                                                                                                                                                                                                                                                                                                                           | 2012       | nd                                                                                                                                                                                                                                                                        | rituximab                                                                                              | 375 mg/m2 on days 1, 8, 15, 22 and then 2 months later                                            | 124 weeks                                                                                                               | nd                                                               | 9/27 (33%)                                        |                 |         | Fair    |
| 22147661; 26255249      | De Vita S., Quartuccio L., Isola M., Mazza C., Scaini P., Lenzi M., Campanini M., Naclerio C., Tavoni A., Pietrogrande M., Ferri C., Mascia MT., Masolini P., Zabotti A., Maset M., Roccatello D., Zignego AL, Pioltelli P., Gabrielli A., Filippini D., Perrella O., Migliaresi S., Galli M., Bombardieri S., Monti G., Quartuccio L., Zuliani F., Corazza L., Scaini P., Zani R., Lenzi M., Tavoni A., Sebastiani M., Baldovino S., Urraro T., Saccardo F., Sbreglia C., Mazza C., Pioltelli P., Fraticelli P., Filippini D., Gabrielli A., Perrella O., Scarpato S., Roccatello D., Zignego AL, Ferri C., Bombardieri S., Pietrogrande M., Monti G., Galli M., De Vita S. | 2012; 2015 | nd                                                                                                                                                                                                                                                                        | rituximab control                                                                                      | 1 g IV days 0 and 14                                                                              | 24 months                                                                                                               | 24 months                                                        | 2/28 (7.1%)                                       |                 |         | Fair    |
| 26474537                | Sise ME., Bloom AK., Wisocky J., Lin MV., Gustafson JL., Lundquist AL., Steele D., Thim M., Williams WW., Hashemi N., Kim AY., Thadhani R., Chung RT.                                                                                                                                                                                                                                                                                                                                                                                                                                                                                                                        | 2016       | nd                                                                                                                                                                                                                                                                        | sofosbuvir-based therapy (SOF/SIM: 67%; SOF/RBV 12 weeks: 17%; SOF/RBV 24 weeks: 17%)                  | 180 µg QW + 800 mg OD<br>SOF: 400 mg OD; SIM: 150 mg OD; RBV: 400-1200 mg OD                      | 12 weeks                                                                                                                | SOF: 12-24 weeks; SIM: 12 weeks; RBV: 12-24 weeks                | 10/12 (83.3%)                                     |                 |         | Poor    |
|                         |                                                                                                                                                                                                                                                                                                                                                                                                                                                                                                                                                                                                                                                                              |            | due to severe AEs                                                                                                                                                                                                                                                         | peg-IFN + RBV<br>sofosbuvir-based therapy (SOF/SIM: 67%; SOF/RBV 12 weeks: 17%; SOF/RBV 24 weeks: 17%) | 180 µg QW + 800 mg OD<br>SOF: 400 mg OD; SIM: 150 mg OD; RBV: 400-1200 mg OD                      | 12-24 weeks                                                                                                             | 24-52 weeks<br>SOF: 12-24 weeks; SIM: 12 weeks; RBV: 12-24 weeks | 1/10 (10%)<br>1/12 (8.3%)                         |                 |         |         |
|                         |                                                                                                                                                                                                                                                                                                                                                                                                                                                                                                                                                                                                                                                                              |            | nd                                                                                                                                                                                                                                                                        | peg-IFN + RBV<br>sofosbuvir-based therapy (SOF/SIM: 67%; SOF/RBV 12 weeks: 17%; SOF/RBV 24 weeks: 17%) | 180 µg QW + 800 mg OD<br>SOF: 400 mg OD; SIM: 150 mg OD; RBV: 400-1200 mg OD                      | 24-52 weeks<br>12 weeks                                                                                                 | 24-52 weeks<br>SOF: 12-24 weeks; SIM: 12 weeks; RBV: 12-24 weeks | 5/10 (50%)<br>2/12 (16.6%)                        |                 |         |         |
|                         |                                                                                                                                                                                                                                                                                                                                                                                                                                                                                                                                                                                                                                                                              |            | nd                                                                                                                                                                                                                                                                        | peg-IFN + RBV<br>sofosbuvir-based therapy (SOF/SIM: 67%; SOF/RBV 12 weeks: 17%; SOF/RBV 24 weeks: 17%) | 180 µg QW + 800 mg OD<br>SOF: 400 mg OD; SIM: 150 mg OD; RBV: 400-1200 mg OD                      | 12-24 weeks                                                                                                             | 24-52 weeks<br>SOF: 12-24 weeks; SIM: 12 weeks; RBV: 12-24 weeks | nd/10 (nd)<br>2/12 (16.6%)                        |                 |         |         |
| 22147444                | Sneller MC., Hu Z., Langford CA.                                                                                                                                                                                                                                                                                                                                                                                                                                                                                                                                                                                                                                             | 2012       | nd                                                                                                                                                                                                                                                                        | rituximab control                                                                                      | 180 µg QW + 800 mg OD<br>375 mg/m2 on days 1, 8, 15, and 22                                       | 24-52 weeks<br>12 months                                                                                                | 24-52 weeks<br>12 months                                         | 5/10 (50%)<br>4/12 (33.3%)                        |                 |         | Good    |
| 25890508                | Mazzaro C., Panarello G., Mauro E., Gattei V., Pozzato G.                                                                                                                                                                                                                                                                                                                                                                                                                                                                                                                                                                                                                    | 2015       | nd                                                                                                                                                                                                                                                                        | rituximab control                                                                                      | 375 mg/m2 on days 1, 8, 15, and 22                                                                | 12 months                                                                                                               | 12 months                                                        | 1/12 (8.3%)<br>0/12 (0%)                          |                 |         |         |
| 25890508                |                                                                                                                                                                                                                                                                                                                                                                                                                                                                                                                                                                                                                                                                              |            | nd                                                                                                                                                                                                                                                                        | peg-IFN + RBV                                                                                          | 1.5 µg/kg QW + 800-1200 mg OD                                                                     | 4 months                                                                                                                | 24-48 weeks                                                      | 6/10 (60%)                                        |                 |         | Good    |
| 17075881                | Saadoun D., Resche-Rigon M., Thibault V., Piette JC., Cacoub P.                                                                                                                                                                                                                                                                                                                                                                                                                                                                                                                                                                                                              | 2006       | An early virologic response was defined as the absence of detectable serum HCV RNA 3 months after starting antiviral treatment.<br><br>A sustained virologic response was defined as the absence of detectable serum HCV RNA 6 months after stopping antiviral treatment. | IFN + RBV<br><br>peg-IFN + RBV<br>IFN + RBV                                                            | 3 MU TIW + 600-1200 mg OD<br><br>1.5 µg/kg OD + 600-1200 mg OD<br>3 MU TIW + 600-1200 mg OD       | 3 months<br><br>12 months                                                                                               | ≥6 months<br>≥6 months                                           | 16/32 (50%)<br><br>25/40 (62.5%)<br>19/32 (59.3%) |                 |         | Good    |
|                         |                                                                                                                                                                                                                                                                                                                                                                                                                                                                                                                                                                                                                                                                              |            |                                                                                                                                                                                                                                                                           | peg-IFN + RBV<br>IFN + RBV                                                                             | 1.5 µg/kg OD + 600-1200 mg OD<br>3 MU TIW + 600-1200 mg OD                                        | 16.63 months (end of therapy)                                                                                           | ≥6 months<br>≥6 months                                           | 30/40 (75%)<br>20/32 (62.5%)                      |                 |         |         |
|                         |                                                                                                                                                                                                                                                                                                                                                                                                                                                                                                                                                                                                                                                                              |            |                                                                                                                                                                                                                                                                           | peg-IFN + RBV<br>IFN + RBV                                                                             | 1.5 µg/kg OD + 600-1200 mg OD<br>3 MU TIW + 600-1200 mg OD                                        | 39.7 months (end of follow-up)                                                                                          | ≥6 months<br>≥6 months                                           | 30/40 (75%)<br>17/32 (53.1%)                      |                 |         |         |
|                         |                                                                                                                                                                                                                                                                                                                                                                                                                                                                                                                                                                                                                                                                              |            |                                                                                                                                                                                                                                                                           | peg-IFN + RBV<br>IFN + RBV                                                                             | 1.5 µg/kg OD + 600-1200 mg OD<br>3 MU TIW + 600-1200 mg OD                                        | 16.63 months (end of therapy)                                                                                           | ≥6 months<br>≥6 months                                           | 25/40 (62.5%)<br>6/32 (18.8%)                     | nd              | 0.98    |         |
|                         |                                                                                                                                                                                                                                                                                                                                                                                                                                                                                                                                                                                                                                                                              |            |                                                                                                                                                                                                                                                                           | peg-IFN + RBV<br>IFN + RBV                                                                             | 1.5 µg/kg OD + 600-1200 mg OD<br>3 MU TIW + 600-1200 mg OD                                        | 39.7 months (end of follow-up)                                                                                          | ≥6 months<br>≥6 months                                           | 2/40 (5%)<br>0/32 (0%)                            |                 |         |         |
|                         |                                                                                                                                                                                                                                                                                                                                                                                                                                                                                                                                                                                                                                                                              |            |                                                                                                                                                                                                                                                                           | peg-IFN + RBV<br>IFN + RBV                                                                             | 1.5 µg/kg OD + 600-1200 mg OD<br>3 MU TIW + 600-1200 mg OD                                        | 39.7 months (end of follow-up)                                                                                          | ≥6 months<br>≥6 months                                           | 0/40 (0%)<br>nd/32 (53.1%)                        |                 |         |         |
| 22153224                | Mazzaro                                                                                                                                                                                                                                                                                                                                                                                                                                                                                                                                                                                                                                                                      | 2011       | nd                                                                                                                                                                                                                                                                        | peg-IFN + RBV<br>peg-IFN + RBV<br>peg-IFN + RBV                                                        | 1.5 µg/kg qW + 800-1200 mg qD<br>1.5 meg/kg qW + 800-1200 mg qD<br>1.5 meg/kg qW + 800-1200 mg qD | >=17.6 or 23.2 months (end of follow-up)<br>>=17.6 or 23.2 months (end of follow-up)<br>24 or 48 weeks (end of therapy) | 24 or 48 weeks<br>24 or 48 weeks<br>24 or 48 weeks               | 43/85 (50.6%)<br>19/86 (22.1%)<br>5/86 (5.8%)     |                 |         | Fair    |

| PMID     | Author   | Year | Definition | Arm                           | Dose                                                                                                                                                                                                                                                                                                                                                                                                                                                                                                                                                                                   | Timepoint              | Duration       | Frequency/Rate | Relative effect | p-value | Quality |
|----------|----------|------|------------|-------------------------------|----------------------------------------------------------------------------------------------------------------------------------------------------------------------------------------------------------------------------------------------------------------------------------------------------------------------------------------------------------------------------------------------------------------------------------------------------------------------------------------------------------------------------------------------------------------------------------------|------------------------|----------------|----------------|-----------------|---------|---------|
| 26853322 | Gragnani | 2016 |            | DAA + RBV                     | (1) ombitasvir, paritaprevir+ ritonavir (once daily dose of 25-mg ombitasvir, 150-mg paritaprevir, and 100- mg ritonavir) and dasabuvir (250 mg twice daily) for 12 or 24 weeks; (2) ombitasvir, paritaprevir+ ritonavir (once daily dose of 25-mg ombitasvir, 150- mg paritaprevir, and 100- mg ritonavir) and dasabuvir (250 mg twice daily) and ribavirin (800-1200 mg daily, weight based dose) for 12 or 24 weeks; (3) sofosbuvir (400 mg once daily) plus daclatasvir (60 mg once daily); (4) sofosbuvir (400 mg once daily) plus ribavirin (800-1200 daily, weight-based dose). | 8 weeks (on treatment) | 12 or 24 weeks | 1/17 (5.9%)    |                 |         |         |
| 27483451 | Gragnani | 2016 | nd         | sofosbuvir-based combinations | sofosbuvir 400 mg, simeprevir 150 mg, ledipasvir 90 mg, daclatasvir 30 mg, and ribavirin 800-1200 mg daily in a weight-based dose                                                                                                                                                                                                                                                                                                                                                                                                                                                      | 24 weeks               | 12 weeks       | 44/44 (100%)   | nd              | nd      | Fair    |
|          |          |      | nd         |                               |                                                                                                                                                                                                                                                                                                                                                                                                                                                                                                                                                                                        | 24 weeks               | 44/44 (100%)   | nd             | nd              | Good    |         |
|          |          |      | nd         |                               |                                                                                                                                                                                                                                                                                                                                                                                                                                                                                                                                                                                        | 4 weeks                | 44/44 (100%)   | nd             | nd              |         |         |
|          |          |      | nd         |                               |                                                                                                                                                                                                                                                                                                                                                                                                                                                                                                                                                                                        |                        | 24 weeks       | 0/44 (0%)      | nd              | nd      |         |

Table S17: Summary Table  
HCV treatment of HCV-associated glomerular disease  
Continuous outcomes

| PMID              | Author        | Year     | Type of article        | Study design                       | Sample size         | CKD stage         | Kidney function             | GN description          | Viral HCV RNA            | HCV genotype             | Outcome                                                                               | Definition                                                              |
|-------------------|---------------|----------|------------------------|------------------------------------|---------------------|-------------------|-----------------------------|-------------------------|--------------------------|--------------------------|---------------------------------------------------------------------------------------|-------------------------------------------------------------------------|
| 18711294          | Abbas G., H   | 2008     | Peer-reviewed publicat | Single arm (cohort), unclear       | 30                  | nd                | SCr: 1.44 mg/dL (range 0    | Membranoproliferative   | nd                       | 3: 100%                  | Kidney Function, continuous<br>Proteinuria, continuous                                | SCr, mg/dL<br>proteinuria, g/24 h                                       |
| 20439619          | Saadoun D.    | 2010     | Peer-reviewed publicat | nRCS, prospective                  | 31 (kidney involven | nd                | GFR: 58.0 (7.4) mL/min; †   | HCV-MC                  | 5.8 log copies/mL (0.7)  | 1: 67.7%; 2: 9.6%; 3: 1: | Kidney Function, continuous<br>Kidney Function, continuous<br>Proteinuria, continuous | creatininemia, μmol/L<br>GFR, mL/min<br>proteinuria, g/24 h             |
| 26567178; ILC 20: | Saadoun D.    | 2015     | Peer-reviewed publicat | Single arm (cohort), prospective   | 24                  | CKD 1-3           | GFR: median 77.3 mL/mi      | HCV-cryoglobulinemia v  | 5.9 log10 IU/mL (4.5-6.: | 1a: 25%; 1b: 25%; 2: 8:  | Kidney Function, continuous<br>QoL Physical status<br>QoL mental status               | median SCr, μmol/L<br>physical status<br>mental status                  |
| EULAR 2013 OPO:   | Roccatello    | 2012     | Abstract               | Single arm (cohort), prospective   | 27                  | Type II mixed cry | SCr: 2.2 (1.9); proteinuria | diffuse membranoprolifi | nd                       | nd                       | Kidney Function, continuous<br>Proteinuria, continuous                                | SCr, mg/dL<br>proteinuria, g/24 h                                       |
| 22147661; 26255   | De Vita S., † | 2012; 20 | Peer-reviewed publicat | RCT                                | 59                  | CKD 1-3           | SCr: 1.4 mg/dL (range 0.7   | Severe cryoglobulinemic | nd                       | nd                       | Kidney Function, continuous<br>Proteinuria, continuous<br>QoL Pain<br>QoL Paresthesia | SCr, mg/dL<br>g/24 h<br>VAS score for pain<br>VAS score for paresthesia |
| 25890508          | Mazzaro C.    | 2015     | Peer-reviewed publicat | Single arm (cohort), retrospective | 10                  | CKD 3             | CrCl: 47 (10) mL/min; SCr   | HCV-positive cryoglobul | 15.0 x 10^6 copies/mL    | 1b: 50%; 2: 20%; 3: 30%  | Kidney Function, continuous<br>Kidney Function, continuous<br>Proteinuria, continuous | SCr, mg/mL<br>CrCl, mL/min<br>g/24 h                                    |
| ACR 2012 1547     | Roccatello    | 2012     | Abstract               | Single arm (cohort), prospective   | 27                  | nd                | SCr: 2.2 (1.9) mg/dL; Prot  | Mixed cryoglobulinemia  | nd                       | nd                       | Kidney function, continuous<br>Proteinuria, continuous                                | SCr, mg/dL<br>g/24 h                                                    |
| 22153224          | Mazzaro       | 2011     | Peer-reviewed publicat | Single arm (cohort), retrospective | 86                  | nd                | nd                          | Mixed cryoglobulinemia  | nd                       | 1a: 7%; 1b: 42%; 2: 39%  | Rheumatoid factor<br>Cryocrit<br>C4 level                                             | U/L<br>%<br>mg/mL                                                       |
| 26853322          | Graghani      | 2016     | Peer-reviewed publicat | Single arm (cohort), prospective   | 17                  | CKD 3: 17.6%      | CrCl: 100.0 (39.6) ml/min   | Mixed cryoglobulinemia  | 1.77 (1.85) x 10^6 IU/m  | 1a: 12%; 1b: 65%; 2: 6:  | Rheumatoid factor<br>Cryocrit                                                         | IU/mL<br>%                                                              |

| PMID     | Author   | Year | Type of article        | Study design      | Sample size | CKD stage | Kidney function | GN description         | Viral HCV RNA                     | HCV genotype                            | Outcome              | Definition     |
|----------|----------|------|------------------------|-------------------|-------------|-----------|-----------------|------------------------|-----------------------------------|-----------------------------------------|----------------------|----------------|
| 27483451 | Gragnani | 2016 | Peer-reviewed publicat | nRCS, prospective | 44          | nd        | nd              | Mixed cryoglobulinemia | 2.9 (3.6) IU/mL x 10 <sup>6</sup> | 1a: 4.5%; 1b: 47.7%, 2: Liver cirrhosis | C4 level<br>C3 Level | mg/dL<br>mg/dL |

Table S17: Summary Table  
HCV treatment of HCV-associated glomerulonephritis  
Continuous outcomes

| PMID                                     | Author      | Year      | Arm                       | Dose         | Duration      | N              | Baseline Value    | Timepoint                               | Value             | Change from baseline | p-value | Quality |
|------------------------------------------|-------------|-----------|---------------------------|--------------|---------------|----------------|-------------------|-----------------------------------------|-------------------|----------------------|---------|---------|
| 18711294                                 | Abbas G., F | 2008      | IFN + RBV                 | 3 MU TI      | ≥6 months     | 30             | 1.44 (0.70, 4.60) | 24 weeks                                | 1.39 (0.80, 2.60) | nd                   | 0.678   | Poor    |
|                                          |             |           | 4 hours                   |              |               | 30             | 4.83 (1.60, 9.07) | 24 weeks                                | 1.19 (0.50, 2.50) | nd                   | <0.001  |         |
| 20439619                                 | Saadoun D.  | 2010      | rituximab + peg-IFN + RBV | 375 mg/      | 52 weeks      | 21             | 217.5 (47.4)      | 24 weeks                                | 136.9 (27.1)      | nd                   | 0.03    | Fair    |
|                                          |             |           | peg-IFN + RBV             | 2a: 180 µg   | 48 weeks      | 10             | 150.0 (30.6)      |                                         | 169.2 (44.2)      | nd                   | 0.28    |         |
|                                          |             |           | rituximab + peg-IFN + RBV | 375 mg/      | 52 weeks      | 21             | 42.8 (5.8)        | 24 weeks                                | 57.6 (4.5)        | nd                   | 0.01    |         |
|                                          |             |           | peg-IFN + RBV             | 2a: 180 µg   | 48 weeks      | 10             | 58.0 (7.4)        |                                         | 59.5 (9.9)        | nd                   | 0.41    |         |
|                                          |             |           | rituximab + peg-IFN + RBV | 375 mg/      | 52 weeks      | 21             | 3.5 (0.9)         | 24 weeks                                | 0.35 (0.1)        | nd                   | <0.001  |         |
| 26567178; ILC 20: Saadoun D.             | 2015        | 2015      | sofosbuvir + ribavirin    | 400 mg       | 24 weeks      | 24             | 89 (80, 163)      | 24 weeks                                | 85 (78, 146)      | nd                   | nd      | Good    |
|                                          |             |           |                           |              |               | 24             | nd                | 24 weeks                                | nd                | +10%                 | nd      |         |
|                                          |             |           |                           |              |               | 24             | nd                | 36 weeks                                | nd                | +14%                 | nd      |         |
|                                          |             |           |                           |              |               | 24             | nd                | 24 weeks                                | nd                | +4%                  | nd      |         |
|                                          |             |           |                           |              |               | 24             | nd                | 36 weeks                                | nd                | +7%                  | nd      |         |
|                                          |             |           |                           |              |               | 24             | 77.3 (44, 90)     | 24 weeks                                | 66.7 (48, 87)     | nd                   | nd      |         |
|                                          |             |           |                           |              |               | 24             | 1.09 (0.6, 2.4)   | 24 weeks                                | 0.17 (0.25, 0.07) | nd                   | nd      |         |
|                                          |             |           |                           |              |               | 24             | 1.09 (0.6, 2.4)   | 24 weeks                                | 0.17 (0.25, 0.07) | nd                   | nd      |         |
| EULAR 2013 OPO: Roccatello               | 2012        | 2012      | rituximab                 | 375 mg/      | nd            | 27             | 2.2 (1.9)         | 216 weeks                               | 1.6 (1.2)         | nd                   | ≤0.05   | Fair    |
|                                          |             |           | 4 hours                   |              |               | 27             | 2.3 (2.1)         | 216 weeks                               | 0.9 (1.9)         | nd                   | ≤0.05   |         |
| 22147661; 26255 De Vita S., (2012; 2012) | 2012        | 2012      | rituximab                 | 1 g IV da    | 24 months     | 28             | 1.6 (0.7, 2.8)    | 1 month                                 | 1.2 (0.8, 6.0)    | nd                   | nd      | Fair    |
|                                          |             |           | control                   | NA           | 24 months     | 29             | 1.2 (0.7, 2.3)    |                                         | 1.2 (1.0, 2.0)    | nd                   | nd      |         |
|                                          |             |           | rituximab                 | 1 g IV da    | 24 months     | 28             | 1.6 (0.7, 2.8)    | 2 months                                | 1.6 (0.8, 6.0)    | nd                   | nd      |         |
|                                          |             |           | control                   | NA           | 24 months     | 29             | 1.2 (0.7, 2.3)    |                                         | 1.5 (0.8, 2.4)    | nd                   | nd      |         |
|                                          |             |           | rituximab                 | 1 g IV da    | 24 months     | 28             | 2.0 (0.6, 7.9)    | 1 month                                 | 0.6 (0.5, 7.8)    | nd                   | nd      |         |
|                                          |             |           | control                   | NA           | 24 months     | 29             | 2.0 (0.9, 6.8)    |                                         | 2.1 (0.9, 7.0)    | nd                   | nd      |         |
|                                          |             |           | rituximab                 | 1 g IV da    | 24 months     | 28             | 2.0 (0.6, 7.9)    | 2 months                                | 0.9 (0.5, 4.5)    | nd                   | nd      |         |
|                                          |             |           | control                   | NA           | 24 months     | 29             | 2.0 (0.9, 6.8)    |                                         | 1.85 (1.0, 11.0)  | nd                   | nd      |         |
|                                          |             |           | rituximab                 | 1 g IV da    | 24 months     | 28             | 70 (10, 100)      | 1 month                                 | 52 (0, 100)       | nd                   | nd      |         |
|                                          |             |           | control                   | NA           | 24 months     | 29             | 88 (30, 100)      |                                         | 82 (20, 100)      | nd                   | nd      |         |
|                                          |             |           | rituximab                 | 1 g IV da    | 24 months     | 28             | 70 (10, 100)      | 2 months                                | 40 (0, 81)        | nd                   | nd      |         |
|                                          |             |           | control                   | NA           | 24 months     | 29             | 88 (30, 100)      |                                         | 90 (0, 100)       | nd                   | nd      |         |
|                                          |             |           | rituximab                 | 1 g IV da    | 24 months     | 28             | 89 (30, 100)      | 1 month                                 | 63 (30, 100)      | nd                   | nd      |         |
|                                          |             |           | control                   | NA           | 24 months     | 29             | 90 (10, 100)      |                                         | 70 (10, 100)      | nd                   | nd      |         |
| rituximab                                | 1 g IV da   | 24 months | 28                        | 89 (30, 100) | 2 months      | 44 (10, 100)   | nd                | nd                                      |                   |                      |         |         |
| control                                  | NA          | 24 months | 29                        | 90 (10, 100) |               | 80.5 (10, 100) | nd                | nd                                      |                   |                      |         |         |
| 25890508                                 | Mazzaro C.  | 2015      | peg-IFN + RBV             | 1.5 µg/k     | 24-48 weeks   | 10             | 1.6 (0.3)         | 4 months                                | 1.6 (0.6)         | nd                   | nd      | Good    |
|                                          |             |           |                           |              |               | 10             |                   | 36 months                               | 1.7 (0.9)         | nd                   | nd      |         |
|                                          |             |           |                           |              |               | 10             | 47 (10)           | 4 months                                | 46 (16)           | nd                   | nd      |         |
|                                          |             |           |                           |              |               | 10             |                   | 36 months                               | 42 (14)           | nd                   | nd      |         |
|                                          |             |           |                           |              |               | 10             | 4.0 (0.7)         | 4 months                                | 2.9 (1.7)         | nd                   | nd      |         |
| ACR 2012 1547                            | Roccatello  | 2012      | rituximab                 | 375 mg/      | 3 months      | 27             | 2.2 (1.9)         | 3 months                                | 1.6 (1.2)         | nd                   | ≤0.05   | ND      |
|                                          |             |           |                           |              |               | 27             | 2.3 (2.1)         | 3 months                                | 0.9 (1.9)         | nd                   | ≤0.05   |         |
| 22153224                                 | Mazzaro     | 2011      | peg-IFN + RBV             | 1.5 meg      | 24 or 48 week | 86             | 211 (320)         | 24 or 48 weeks (end of therapy)         | 175 (324)         | nd                   | nd      | Fair    |
|                                          |             |           |                           |              |               | 86             |                   | ≥17.6 or 23.2 months (end of follow-up) | 197 (348)         | nd                   | nd      |         |
|                                          |             |           | peg-IFN + RBV             | 1.5 meg      | 24 or 48 week | 86             | 5.6 (6.0)         | 24 or 48 weeks (end of therapy)         | 2.4 (4.5)         | nd                   | nd      |         |
|                                          |             |           |                           |              |               | 86             |                   | ≥17.6 or 23.2 months (end of follow-up) | 3.8 (4.2)         | nd                   | nd      |         |
| 26853322                                 | Gragnani    | 2016      | DAA + RBV                 | (1) ombi     | 12 or 24 week | 17             | 626.6 (216.8)     | 8 weeks (on treatment)                  | 137.7 (30.3)      | nd                   | nd      | Fair    |
|                                          |             |           | DAA + RBV                 | (1) ombi     | 12 or 24 week | 17             | 60.2 (11.0)       | 8 weeks (on treatment)                  | 13.4 (3.1)        | nd                   | nd      |         |

| PMID     | Author   | Year | Arm                         | Dose     | Duration      | N  | Baseline Value | Timepoint              | Value         | Change from baseline | p-value | Quality |
|----------|----------|------|-----------------------------|----------|---------------|----|----------------|------------------------|---------------|----------------------|---------|---------|
|          |          |      | DAA + RBV                   | (1) ombi | 12 or 24 week | 17 | 0.087 (0.010)  | 8 weeks (on treatment) | 0.094 (0.009) | nd                   | nd      |         |
|          |          |      | DAA + RBV                   | (1) ombi | 12 or 24 week | 17 | 0.71 (0.02)    | 8 weeks (on treatment) | 0.88 (0.03)   | nd                   | nd      |         |
| 27483451 | Gragnani | 2016 | sofosbuvir-based combinator | sofosbus | 24 weeks      | 44 | 9.9 (2.5)      | 12 weeks               | 8.8 (2.7)     | nd                   | nd      | Good    |
|          |          |      |                             |          |               |    |                | 24 weeks               | 7.3 (1.9)     | nd                   | nd      |         |

**Table S18: Evidence profile: HCV treatment of HCV-associated glomerular disease**

| Outcome                                      | # of Studies and Study Design                         | Total N of Patients on Treatment | Methodological Quality of Studies | Consistency Across Studies      | Directness of the Evidence, including Applicability | Other Considerations | Summary of Findings             |                                                                                                                                                                                                  |                       |
|----------------------------------------------|-------------------------------------------------------|----------------------------------|-----------------------------------|---------------------------------|-----------------------------------------------------|----------------------|---------------------------------|--------------------------------------------------------------------------------------------------------------------------------------------------------------------------------------------------|-----------------------|
|                                              |                                                       |                                  |                                   |                                 |                                                     |                      | Quality of Evidence for Outcome | Description of Findings                                                                                                                                                                          | Importance of Outcome |
| <b>Survival</b>                              | 1 RCT<br>2 cohort (pro)                               | 155                              | Some limitations (-1)*            | Consistent (0)                  | Direct (0)                                          | Sparse (-1)          | Low                             | Range of survival was 83%-92%<br>Survival was 89% at 40 months for interferon+ribavirin<br>Survival was 92% at 40 months for sofosbuvir+ribavirin<br>Survival was 83% at 73 months for rituximab | Critical              |
| <b>Sustained virological response</b>        | 1 RCT<br>13 cohort (4 pro, 9 ret)                     | 654                              | Some limitations (-1)‡            | Consistent (0)                  | Direct (0)                                          | None (0)             | Moderate                        | SVR 12 or 24:74-100% with DAA treatment (5 studies)<br>10-63% with PEG-IFN +RBV (4 studies)<br>50-53% with IFN + RBV (2 studies)                                                                 | High                  |
| <b>Serious adverse events</b>                | 2 RCT<br>5 cohort (3 pro, 1 ret, 1 unclear)           | 248                              | Some limitations (-1)¶            | Important inconsistencies (-1)† | Direct (0)                                          | None (0)             | Low                             | 6-17% with Sofosbuvir-based treatment (3 studies)<br>26-55% with IFN + RBV or PEG-IFN +RBV (4 studies)<br>8-18% with rituximab (2 studies)<br>0-10% in placebo arms (2 studies)                  | High                  |
| <b>Discontinuation due to adverse events</b> | 2 RCT<br>12 cohort (5 pro, 5 ret)                     | 362                              | Some limitations (-1)¶            | Important inconsistencies (-1)† | Direct (0)                                          | None (0)             | Low                             | 0-8% with Sofosbuvir-based treatment (2 studies)<br>0-10% with IFN + RBV or PEG-IFN +RBV (4 studies)<br>7% with rituximab (1 study)                                                              | High                  |
| <b>Kidney function, continuous</b>           | 1 RCT<br>1 nRCS<br>5 cohort (3 pro, 1 ret, 1 unclear) | 208                              | Some limitations (-1)¶¶           | Important inconsistencies (-1)† | Direct (0)                                          | None (0)             | Low                             | Range of decreased serum creatinine for interferon 0-0.1mg/dl<br>Range of decreased serum creatinine for rituximab 0.4-0.9mg/dl<br>Decreased serum creatinine for sofosbuvir+ribavirin 0.04mg/dl | Moderate              |
| <b>Quality of Life</b>                       | 1 RCT<br>1 cohort (pro)                               | 73                               | Some limitations (-1)¶¶           | Important inconsistencies (-1)† | Direct (0)                                          | None (0)             | Low                             | Increased quality of life (physical, mental status) with sofosbuvir+ribavirin (1 study)<br>Increased quality of life (pain, paresthesia) with rituximab (1 study)                                | High                  |
| <b>Proteinuria, continuous</b>               | 1 RCT<br>1 nRCS<br>5 cohort (3 pro, 1 ret, 1 unclear) | 208                              | Some limitations (-1)¶¶           | Important inconsistencies (-1)† | Direct (0)                                          | None (0)             | Low                             | Range of decreased proteinuria for interferon 28-75%<br>Range of decreased proteinuria for rituximab 61-90%<br>Decreased proteinuria for sofosbuvir+ribavirin 84%                                | Moderate              |
| <b>Cryocrit, Continuous</b>                  | 2 cohort (1 pro, 1 ret)                               | 103                              | Some limitations (-1)¶¶           | Important inconsistencies (-1)† | Direct (0)                                          | None (0)             | Low                             | 77% decrease in cryocrit with DAA treatment† (1 study)<br>32% decrease in cryocrit with PEG-IFN (1 study)                                                                                        | Moderate              |



---

|         |     |
|---------|-----|
| Total N | 702 |
|---------|-----|

---

**Balance of Potential Benefits and Harms:**

Decreased proteinuria for all interventions, improvement in renal function, cryocrit and quality of life for sofosbuvir and rituximab; SVR rates high for DAAs and interferon-based treatment with low rates of discontinuation for all agents, despite high serious adverse event rates with interferon-based treatments. Survival rates good but no untreated group for comparison.

**Quality of Overall Evidence:**

Low

---

**Studies included in EP:** 18711294, 26567178, ILC 2015 LP08, EULAR 2013 OPO212, 22147661; 26255249, 26474537, 22147444, 25890508, 17075881, 22153224, 26853322, 27483451, 20439619

**Abbreviations:** DAA = direct acting antiviral; ESRD: end stage renal disease; GN: glomerulonephritis; HCV: hepatitis C; nRCS: non-randomized controlled study; pro = prospective (single-group cohort), RCT: randomized controlled trial; ret = retrospective (single-group cohort), SVR: sustained virologic response

**Annotations:**

\* 1 good quality; 2 fair quality

† Heterogeneous treatment and inconsistent reporting of outcomes

‡ 4 good quality; 2 fair quality; 9 poor quality

§ Wide range of sample sizes and duration of follow-up

|| 4 good quality; 3 fair quality; 7 poor quality

¶ 3 good quality; 2 fair quality; 2 poor quality

\*\* 3 good quality; 3 fair quality; 1 poor quality

†† 1 fair quality; 6 poor quality

‡‡ 2 good quality; 4 fair quality; 1 poor quality
